# Supplementary material for: Projective light-sheet microscopy with flexible parameter selection
Source: Nat Commun. 2024 Mar 29;15:2755. doi: 10.1038/s41467-024-46693-y (PMC10980818; doi:10.1038/s41467-024-46693-y)
Supplement: Supplementary file 15 — Source Data file [file 41467_2024_46693_MOESM15_ESM.xlsx]

## Sheet: Figure 3d
Figure 3d	ms	deltaF/F
	0	0.0405895
	20.9	0.0340445
	41.8	-0.00676609
	62.7	-0.0150969
	83.6	-0.00609871
	104.5	-0.00763279
	125.4	-0.0318521
	146.3	-0.0308093
	167.2	-0.0291113
	188.1	-0.0377657
	209	-0.0278206
	229.9	-0.0386144
	250.8	-0.0324037
	271.7	-0.0425799
	292.6	-0.046794
	313.5	-0.0422129
	334.4	-0.0438003
	355.3	-0.0413634
	376.2	-0.0388703
	397.1	-0.0294946
	418	-0.0302972
	438.9	-0.0428384
	459.8	-0.043832
	480.7	-0.0407971
	501.6	-0.0402762
	522.5	-0.0462799
	543.4	-0.0488304
	564.3	-0.0401829
	585.2	-0.0346226
	606.1	-0.0519636
	627	-0.0513204
	647.9	-0.0440305
	668.8	-0.0482912
	689.7	-0.0335268
	710.6	-0.0358275
	731.5	-0.0426431
	752.4	-0.0324887
	773.3	-0.0415153
	794.2	-0.0429504
	815.1	-0.0244033
	836	-0.0300702
	856.9	-0.0421194
	877.8	-0.0263861
	898.7	-0.0368094
	919.6	-0.0284202
	940.5	-0.0358164
	961.4	-0.0317481
	982.3	-0.0274712
	1003.2	-0.029588
	1024.1	-0.0387487
	1045	-0.0403585
	1065.9	-0.0329809
	1086.8	-0.0432454
	1107.7	-0.0317512
	1128.6	-0.0510566
	1149.5	-0.0384102
	1170.4	-0.0361225
	1191.3	-0.027774
	1212.2	-0.0377115
	1233.1	-0.0343434
	1254	-0.0326061
	1274.9	-0.0363112
	1295.8	-0.0363299
	1316.7	-0.0271796
	1337.6	-0.0259963
	1358.5	-0.0402029
	1379.4	-0.0319523
	1400.3	-0.0450044
	1421.2	-0.0423633
	1442.1	-0.0284756
	1463	-0.0424792
	1483.9	-0.0548879
	1504.8	-0.0456035
	1525.7	-0.0346035
	1546.6	-0.0368163
	1567.5	-0.0482498
	1588.4	-0.0490215
	1609.3	-0.0454945
	1630.2	-0.0468051
	1651.1	-0.0487223
	1672	-0.0440916
	1692.9	-0.0500022
	1713.8	-0.051073
	1734.7	-0.0548349
	1755.6	-0.0483176
	1776.5	-0.0411339
	1797.4	-0.0543308
	1818.3	-0.0638404
	1839.2	-0.0560289
	1860.1	-0.0507535
	1881	-0.0503708
	1901.9	-0.0618176
	1922.8	-0.0544441
	1943.7	-0.0642693
	1964.6	-0.065115
	1985.5	-0.0572589
	2006.4	-0.0745453
	2027.3	-0.0645254
	2048.2	-0.0564169
	2069.1	-0.0685261
	2090	-0.0617103
	2110.9	-0.0639327
	2131.8	-0.0625704
	2152.7	-0.0536869
	2173.6	-0.0510466
	2194.5	-0.063182
	2215.4	-0.0575762
	2236.3	-0.0428621
	2257.2	-0.0474873
	2278.1	-0.0471488
	2299	-0.0510231
	2319.9	-0.0388631
	2340.8	-0.045273
	2361.7	-0.0507498
	2382.6	-0.036384
	2403.5	-0.0335663
	2424.4	-0.0478222
	2445.3	-0.0371941
	2466.2	-0.0343365
	2487.1	-0.0381565
	2508	-0.0356578
	2528.9	-0.0388794
	2549.8	-0.038434
	2570.7	-0.0201442
	2591.6	-0.0318037
	2612.5	-0.0314747
	2633.4	-0.0209789
	2654.3	-0.0290529
	2675.2	-0.0246639
	2696.1	-0.0323798
	2717	-0.0057301
	2737.9	-0.00584751
	2758.8	-0.0103175
	2779.7	-0.0154716
	2800.6	-0.00825246
	2821.5	0.00839281
	2842.4	0.0163508
	2863.3	0.0121288
	2884.2	0.0223589
	2905.1	0.0528572
	2926	0.0732828
	2946.9	0.0843461
	2967.8	0.126014
	2988.7	0.148902
	3009.6	0.156554
	3030.5	0.206362
	3051.4	0.228639
	3072.3	0.258428
	3093.2	0.248263
	3114.1	0.257636
	3135	0.251167
	3155.9	0.266653
	3176.8	0.245083
	3197.7	0.239118
	3218.6	0.228708
	3239.5	0.223637
	3260.4	0.210454
	3281.3	0.211866
	3302.2	0.182591
	3323.1	0.191161
	3344	0.171161
	3364.9	0.181669
	3385.8	0.180315
	3406.7	0.169673
	3427.6	0.137394
	3448.5	0.130603
	3469.4	0.139721
	3490.3	0.121063
	3511.2	0.115983
	3532.1	0.141001
	3553	0.11424
	3573.9	0.102944
	3594.8	0.0757447
	3615.7	0.0852028
	3636.6	0.109527
	3657.5	0.0670297
	3678.4	0.0647253
	3699.3	0.0637867
	3720.2	0.0470635
	3741.1	0.0588188
	3762	0.021814
	3782.9	0.0142579
	3803.8	0.0194225
	3824.7	-0.000393187
	3845.6	-0.0196163
	3866.5	-0.0132358
	3887.4	-0.0248536
	3908.3	-0.0465474
	3929.2	-0.0459205
	3950.1	-0.0678498
	3971	-0.0658792
	3991.9	-0.0801472
	4012.8	-0.0739762
	4033.7	-0.0771566
	4054.6	-0.0881784
	4075.5	-0.0861166
	4096.4	-0.0898587
	4117.3	-0.0773456
	4138.2	-0.103071
	4159.1	-0.086265
	4180	-0.0983515
	4200.9	-0.0977061
	4221.8	-0.0979562
	4242.7	-0.0974083
	4263.6	-0.0919776
	4284.5	-0.102107
	4305.4	-0.0958039
	4326.3	-0.0860927
	4347.2	-0.0926663
	4368.1	-0.0846604
	4389	-0.0930825
	4409.9	-0.0782395
	4430.8	-0.0954929
	4451.7	-0.101605
	4472.6	-0.0728839
	4493.5	-0.0812991
	4514.4	-0.065397
	4535.3	-0.0751819
	4556.2	-0.0725902
	4577.1	-0.0586821
	4598	-0.0597948
	4618.9	-0.0504535
	4639.8	-0.0589392
	4660.7	-0.0600003
	4681.6	-0.0713398
	4702.5	-0.0705872
	4723.4	-0.071224
	4744.3	-0.0908563
	4765.2	-0.0808285
	4786.1	-0.0767629
	4807	-0.0909393
	4827.9	-0.0805573
	4848.8	-0.100665
	4869.7	-0.0884929
	4890.6	-0.0791154
	4911.5	-0.0821449
	4932.4	-0.0871848
	4953.3	-0.0804024
	4974.2	-0.0781609
	4995.1	-0.0763802
	5016	-0.084744
	5036.9	-0.0778545
	5057.8	-0.0686743
	5078.7	-0.0773266
	5099.6	-0.0562251
	5120.5	-0.0548493
	5141.4	-0.0602146
	5162.3	-0.0461545
	5183.2	-0.0430093
	5204.1	-0.0518614
	5225	-0.0292998
	5245.9	-0.020205
	5266.8	-0.0236512
	5287.7	-0.00200753
	5308.6	0.00555237
	5329.5	0.026764
	5350.4	0.0385168
	5371.3	0.0245565
	5392.2	0.0190992
	5413.1	0.0462009
	5434	0.0597303
	5454.9	0.0503489
	5475.8	0.0704661
	5496.7	0.0778844
	5517.6	0.078225
	5538.5	0.0885307
	5559.4	0.121396
	5580.3	0.103656
	5601.2	0.100356
	5622.1	0.0933573
	5643	0.108921
	5663.9	0.10745
	5684.8	0.0883734
	5705.7	0.111778
	5726.6	0.109318
	5747.5	0.102742
	5768.4	0.105893
	5789.3	0.110107
	5810.2	0.126614
	5831.1	0.0935813
	5852	0.100556
	5872.9	0.0909481
	5893.8	0.112484
	5914.7	0.0922017
	5935.6	0.107507
	5956.5	0.0961492
	5977.4	0.104489
	5998.3	0.111191
	6019.2	0.0757787
	6040.1	0.0897668
	6061	0.0676061
	6081.9	0.0825253
	6102.8	0.0823883
	6123.7	0.068963
	6144.6	0.0934273
	6165.5	0.0717496
	6186.4	0.0830507
	6207.3	0.0752995
	6228.2	0.0763045
	6249.1	0.103571
	6270	0.0845145
	6290.9	0.061677
	6311.8	0.0633415
	6332.7	0.0877901
	6353.6	0.0801642
	6374.5	0.110249
	6395.4	0.0785841
	6416.3	0.0729589
	6437.2	0.0539361
	6458.1	0.0565246
	6479	0.0615849
	6499.9	0.0619788
	6520.8	0.0870003
	6541.7	0.0886059
	6562.6	0.0933818
	6583.5	0.0469676
	6604.4	0.0564494
	6625.3	0.0339793
	6646.2	0.0475497
	6667.1	0.0227659
	6688	0.0147631
	6708.9	0.0014024
	6729.8	-0.00806199
	6750.7	-0.0241343
	6771.6	-0.0175945
	6792.5	-0.0356141
	6813.4	-0.0281978
	6834.3	-0.0426656
	6855.2	-0.038812
	6876.1	-0.0366131
	6897	-0.0523804
	6917.9	-0.0480103
	6938.8	-0.0614175
	6959.7	-0.0622965
	6980.6	-0.0517529
	7001.5	-0.053498
	7022.4	-0.0493135
	7043.3	-0.055485
	7064.2	-0.0518361
	7085.1	-0.0582609
	7106	-0.0383264
	7126.9	-0.0520019
	7147.8	-0.043314
	7168.7	-0.0530741
	7189.6	-0.0512449
	7210.5	-0.0488444
	7231.4	-0.0432578
	7252.3	-0.0473173
	7273.2	-0.0410275
	7294.1	-0.0510495
	7315	-0.0516274
	7335.9	-0.0396368
	7356.8	-0.0495482
	7377.7	-0.0569778
	7398.6	-0.0445697
	7419.5	-0.0415099
	7440.4	-0.0383947
	7461.3	-0.0393083
	7482.2	-0.0467809
	7503.1	-0.0269432
	7524	-0.0397129
	7544.9	-0.026298
	7565.8	-0.023113
	7586.7	-0.0310682
	7607.6	-0.0289335
	7628.5	-0.0366563
	7649.4	-0.0235514
	7670.3	-0.0258215
	7691.2	-0.033427
	7712.1	-0.031346
	7733	-0.0369936
	7753.9	-0.0301961
	7774.8	-0.0363717
	7795.7	-0.03855
	7816.6	-0.0379401
	7837.5	-0.0412329
	7858.4	-0.0362665
	7879.3	-0.0333938
	7900.2	-0.0231547
	7921.1	-0.034153
	7942	-0.0205185
	7962.9	-0.0407394
	7983.8	-0.0401459
	8004.7	-0.0339288
	8025.6	-0.0415802
	8046.5	-0.0463977
	8067.4	-0.0288784
	8088.3	-0.0242401
	8109.2	-0.0275325
	8130.1	-0.0248931
	8151	-0.0303619
	8171.9	-0.0269244
	8192.8	-0.0393076
	8213.7	-0.0266919
	8234.6	-0.0223615
	8255.5	-0.0204198
	8276.4	-0.0218636
	8297.3	-0.0180854
	8318.2	0.0033968
	8339.1	-0.0174481

## Sheet: Supplementary Figure 6
Supplementary Figure 6	Scanning Galvo Position	Shearing Galvo Shift Value
	-91.05	-392
	-90.8999	-390
	-90.7499	-389
	-90.5998	-388
	-90.4498	-386
	-90.2997	-385
	-90.1496	-383
	-89.9996	-382
	-89.8495	-380
	-89.6995	-379
	-89.5494	-378
	-89.3993	-376
	-89.2493	-375
	-89.0992	-373
	-88.9492	-372
	-88.7991	-371
	-88.649	-369
	-88.4991	-368
	-88.3485	-366
	-88.112	-365
	-88.041	-364
	-88.0337	-363
	-87.8719	-362
	-87.7161	-360
	-87.4966	-360
	-87.3312	-358
	-87.1888	-357
	-87.0227	-355
	-86.9996	-354
	-86.9656	-353
	-86.7728	-352
	-86.5606	-351
	-86.4083	-349
	-86.2588	-348
	-86.1087	-347
	-85.9581	-345
	-85.8103	-344
	-85.5969	-343
	-85.4153	-342
	-85.2719	-340
	-85.12	-339
	-84.9705	-337
	-84.8202	-336
	-84.6706	-334
	-84.5187	-333
	-84.3757	-332
	-84.1892	-330
	-83.9788	-329
	-83.8329	-328
	-83.6818	-327
	-83.532	-325
	-83.3819	-324
	-83.2318	-322
	-83.0819	-321
	-82.9314	-319
	-82.783	-318
	-82.6265	-317
	-82.4079	-316
	-82.2402	-314
	-82.0945	-313
	-81.9431	-312
	-81.7939	-310
	-81.6419	-309
	-81.4988	-307
	-81.2989	-306
	-81.0997	-305
	-80.9567	-304
	-80.805	-302
	-80.6543	-301
	-80.5085	-299
	-80.3402	-298
	-80.1217	-297
	-79.9658	-296
	-79.8172	-294
	-79.667	-293
	-79.516	-292
	-79.3699	-290
	-79.1592	-289
	-78.9732	-288
	-78.8302	-286
	-78.6783	-285
	-78.5286	-284
	-78.3789	-282
	-78.2271	-281
	-78.0837	-279
	-77.9016	-278
	-77.6885	-277
	-77.541	-276
	-77.39	-274
	-77.241	-273
	-77.0877	-272
	-76.8701	-271
	-76.6986	-269
	-76.5517	-268
	-76.4076	-266
	-76.2124	-265
	-76.009	-264
	-75.8654	-263
	-75.7138	-261
	-75.5633	-260
	-75.4166	-258
	-75.2525	-257
	-75.0334	-256
	-74.8739	-255
	-74.7262	-253
	-74.5759	-252
	-74.4246	-251
	-74.2798	-249
	-74.0724	-248
	-73.8817	-247
	-73.7395	-246
	-73.5858	-244
	-73.4423	-243
	-73.2647	-241
	-73.0493	-240
	-72.8994	-239
	-72.7494	-238
	-72.5991	-236
	-72.3841	-235
	-72.2049	-234
	-72.0684	-233
	-71.8751	-231
	-71.6691	-230
	-71.5238	-229
	-71.3748	-227
	-71.2152	-226
	-70.996	-225
	-70.8327	-224
	-70.6844	-222
	-70.5398	-221
	-70.3366	-220
	-70.1411	-219
	-69.9988	-217
	-69.8453	-216
	-69.7011	-214
	-69.5282	-213
	-69.311	-212
	-69.1583	-211
	-69.0084	-209
	-68.8604	-208
	-68.647	-207
	-68.4658	-206
	-68.3205	-204
	-68.1757	-203
	-67.9899	-202
	-67.7794	-201
	-67.633	-199
	-67.4834	-198
	-67.3277	-196
	-67.1096	-196
	-66.9394	-194
	-66.8008	-193
	-66.6004	-192
	-66.3999	-191
	-66.2611	-189
	-66.0916	-188
	-65.8735	-187
	-65.716	-186
	-65.5721	-184
	-65.3583	-183
	-65.1798	-182
	-65.0069	-181
	-64.7903	-180
	-64.6431	-178
	-64.49	-177
	-64.2731	-176
	-64.0984	-175
	-63.9609	-173
	-63.765	-172
	-63.5604	-171
	-63.4199	-169
	-63.2551	-168
	-63.0365	-167
	-62.8746	-166
	-62.7328	-164
	-62.5258	-163
	-62.3329	-162
	-62.1959	-161
	-62.018	-159
	-61.8023	-158
	-61.6515	-157
	-61.5021	-156
	-61.284	-155
	-61.1151	-153
	-60.93	-152
	-60.7234	-151
	-60.5697	-150
	-60.3487	-149
	-60.1896	-147
	-59.9935	-146
	-59.7923	-145
	-59.6555	-144
	-59.4808	-143
	-59.2639	-142
	-59.113	-140
	-58.9037	-139
	-58.7162	-138
	-58.581	-136
	-58.3918	-135
	-58.184	-134
	-58.0323	-133
	-57.8124	-132
	-57.649	-131
	-57.4584	-129
	-57.2527	-128
	-57.1144	-127
	-56.9449	-126
	-56.7261	-125
	-56.5738	-123
	-56.3653	-122
	-56.1826	-121
	-56.0105	-120
	-55.7946	-119
	-55.6449	-117
	-55.4394	-116
	-55.2094	-115
	-55.0156	-114
	-54.8728	-113
	-54.7092	-112
	-54.4891	-111
	-54.3341	-109
	-54.1304	-108
	-53.9419	-107
	-53.7745	-106
	-53.5564	-105
	-53.4061	-103
	-53.1922	-102
	-53.0156	-101
	-52.8466	-100
	-52.6174	-99
	-52.3987	-98
	-52.2445	-97
	-52.0481	-95
	-51.8463	-94
	-51.7089	-93
	-51.536	-92
	-51.3184	-91
	-51.1673	-89
	-50.956	-88
	-50.7771	-87
	-50.6007	-86
	-50.3878	-85
	-50.237	-83
	-50.0178	-82
	-49.8529	-81
	-49.662	-80
	-49.4596	-79
	-49.3073	-78
	-49.0899	-77
	-48.8598	-76
	-48.6887	-74
	-48.5146	-73
	-48.2992	-72
	-48.1491	-71
	-47.9322	-70
	-47.7624	-69
	-47.5764	-67
	-47.3708	-66
	-47.2164	-65
	-46.9951	-64
	-46.8377	-63
	-46.6365	-62
	-46.4455	-60
	-46.2801	-59
	-46.0611	-58
	-45.9105	-57
	-45.6971	-56
	-45.5214	-54
	-45.3423	-53
	-45.1307	-52
	-44.9812	-51
	-44.7712	-50
	-44.5384	-49
	-44.3573	-48
	-44.1936	-46
	-43.9736	-45
	-43.8213	-44
	-43.613	-43
	-43.4285	-42
	-43.2657	-41
	-43.0393	-40
	-42.8163	-39
	-42.6585	-37
	-42.4671	-36
	-42.2638	-35
	-42.1121	-34
	-41.8962	-33
	-41.6655	-32
	-41.4922	-31
	-41.321	-29
	-41.1039	-28
	-40.9535	-27
	-40.752	-26
	-40.519	-25
	-40.3259	-24
	-40.1737	-22
	-39.9615	-21
	-39.7308	-21
	-39.5505	-19
	-39.3898	-18
	-39.1698	-17
	-38.9575	-16
	-38.7378	-15
	-38.5361	-14
	-38.3858	-13
	-38.1774	-12
	-37.9449	-11
	-37.7611	-10
	-37.5998	-8
	-37.3796	-7
	-37.2242	-6
	-37.0326	-5
	-36.7995	-4
	-36.5972	-3
	-36.4471	-1
	-36.2426	0
	-36.0104	0
	-35.8202	2
	-35.6659	3
	-35.45	4
	-35.2356	5
	-35.0182	6
	-34.8087	7
	-34.6584	8
	-34.4548	9
	-34.2355	10
	-34.0228	11
	-33.8036	12
	-33.6447	14
	-33.462	15
	-33.2307	16
	-33.0202	17
	-32.8693	18
	-32.6699	19
	-32.4497	20
	-32.2378	21
	-32.0168	22
	-31.855	23
	-31.6736	25
	-31.4505	26
	-31.2404	27
	-31.0173	28
	-30.8389	29
	-30.6751	30
	-30.4528	31
	-30.238	32
	-30.0313	33
	-29.8137	34
	-29.5957	35
	-29.4398	36
	-29.2503	38
	-29.0281	38
	-28.8177	39
	-28.5948	40
	-28.424	42
	-28.2532	43
	-28.0294	44
	-27.8168	45
	-27.6068	46
	-27.3933	47
	-27.1811	48
	-26.9721	49
	-26.7504	50
	-26.5459	51
	-26.3958	52
	-26.1883	53
	-25.9677	54
	-25.7584	55
	-25.5456	56
	-25.3363	57
	-25.116	58
	-24.9074	59
	-24.7571	61
	-24.5538	62
	-24.3319	63
	-24.1228	64
	-23.9106	65
	-23.6978	66
	-23.486	67
	-23.2737	68
	-23.0606	69
	-22.8511	70
	-22.6362	71
	-22.4152	72
	-22.254	73
	-22.0728	74
	-21.8482	75
	-21.6374	76
	-21.4264	77
	-21.2134	78
	-21.0014	79
	-20.7891	80
	-20.5771	81
	-20.3646	82
	-20.152	83
	-19.943	84
	-19.723	85
	-19.5129	86
	-19.3622	88
	-19.1609	89
	-18.9385	90
	-18.7294	91
	-18.5173	92
	-18.3045	93
	-18.0925	94
	-17.8803	95
	-17.6681	96
	-17.4558	97
	-17.2436	98
	-17.0316	99
	-16.8185	100
	-16.6077	101
	-16.3966	102
	-16.1721	102
	-15.9926	104
	-15.8301	105
	-15.6085	106
	-15.394	107
	-15.1844	108
	-14.9713	109
	-14.7591	110
	-14.547	111
	-14.3347	112
	-14.1225	113
	-13.9103	114
	-13.6981	115
	-13.4859	116
	-13.2737	117
	-13.0614	118
	-12.8493	119
	-12.6371	120
	-12.424	121
	-12.2142	122
	-12.0004	123
	-11.778	124
	-11.613	124
	-11.4363	125
	-11.212	126
	-11.0006	127
	-10.7891	128
	-10.5782	129
	-10.3655	130
	-10.142	131
	-9.97259	131
	-9.80083	132
	-9.57694	133
	-9.36459	134
	-9.15425	135
	-8.94128	136
	-8.72921	137
	-8.51622	138
	-8.30652	139
	-8.09207	140
	-7.87046	141
	-7.70774	141
	-7.52841	142
	-7.30389	143
	-7.09277	144
	-6.882	145
	-6.6689	146
	-6.45689	147
	-6.24492	148
	-6.03186	149
	-5.82077	150
	-5.61029	151
	-5.38573	152
	-5.20169	153
	-5.04223	153
	-4.82234	154
	-4.60988	155
	-4.39026	156
	-4.18809	157
	-4.03746	157
	-3.8268	158
	-3.60992	159
	-3.39495	160
	-3.17989	161
	-3.0268	161
	-2.83224	162
	-2.60801	163
	-2.399	164
	-2.18986	165
	-1.96579	166
	-1.77153	167
	-1.61904	167
	-1.40534	168
	-1.17535	169
	-0.996291	170
	-0.836118	170
	-0.614727	171
	-0.389017	172
	-0.221605	172
	-0.0511116	173
	0.175962	174
	0.395419	175
	0.553219	175
	0.735691	176
	0.966493	177
	1.17765	178
	1.32893	178
	1.52653	179
	1.75013	180
	1.95886	181
	2.16839	182
	2.39273	183
	2.58427	184
	2.73797	184
	2.95358	185
	3.18282	186
	3.35919	187
	3.52143	187
	3.74425	188
	3.96875	189
	4.13383	189
	4.30682	190
	4.53496	191
	4.75291	192
	4.90828	192
	5.09729	193
	5.3194	194
	5.52983	195
	5.75283	196
	5.92424	197
	6.09489	197
	6.31782	198
	6.52832	199
	6.75032	200
	6.94012	201
	7.09506	201
	7.31251	202
	7.5409	203
	7.71467	204
	7.87892	204
	8.10323	205
	8.32734	206
	8.487	206
	8.67589	207
	8.88104	208
	9.03296	208
	9.249	209
	9.46403	210
	9.68105	211
	9.89077	212
	10.0412	212
	10.2446	213
	10.4637	214
	10.6767	215
	10.8966	216
	11.0527	216
	11.2496	217
	11.4474	218
	11.6017	218
	11.8213	219
	12.0501	220
	12.2181	221
	12.3953	221
	12.6092	222
	12.7587	222
	12.9649	223
	13.1984	224
	13.3842	225
	13.5439	225
	13.7647	226
	13.9195	226
	14.1234	227
	14.313	228
	14.4723	228
	14.6966	229
	14.9219	230
	15.0828	230
	15.2701	231
	15.476	232
	15.6298	232
	15.8508	233
	16.0096	233
	16.208	234
	16.4034	235
	16.5593	235
	16.7808	236
	17.0084	237
	17.1735	237
	17.3549	238
	17.5655	239
	17.7169	239
	17.9366	240
	18.1004	240
	18.2907	241
	18.4966	242
	18.635	242
	18.8042	242
	19.0231	243
	19.1755	243
	19.3835	244
	19.5671	245
	19.7372	245
	19.9549	246
	20.1035	246
	20.2551	246
	20.4712	247
	20.6481	248
	20.7846	247
	20.9818	248
	21.1821	249
	21.3383	249
	21.5595	250
	21.7157	250
	21.9184	251
	22.108	252
	22.2731	252
	22.4924	253
	22.6449	253
	22.7928	253
	23.0101	254
	23.1811	254
	23.3637	255
	23.5725	256
	23.7245	256
	23.9432	257
	24.1132	257
	24.2518	257
	24.4543	258
	24.6515	259
	24.7958	259
	24.9433	259
	25.1115	259
	25.3299	260
	25.4864	260
	25.6312	260
	25.8434	261
	26.0275	262
	26.1726	262
	26.3173	261
	26.5014	262
	26.712	263
	26.8627	263
	27.0801	264
	27.2525	264
	27.3991	264
	27.5434	264
	27.7383	265
	27.9428	266
	28.0825	266
	28.249	266
	28.4678	267
	28.6264	267
	28.7755	267
	28.921	267
	29.1277	268
	29.3201	269
	29.4567	269
	29.6361	269
	29.8513	270
	30.0009	270
	30.1514	270
	30.367	271
	30.5453	272
	30.6822	271
	30.8748	272
	31.0821	273
	31.224	273
	31.3856	273
	31.6042	274
	31.7693	274
	31.9096	274
	32.114	275
	32.3102	276
	32.4477	276
	32.6222	276
	32.8391	277
	32.9925	277
	33.1395	277
	33.3537	278
	33.5342	279
	33.6797	279
	33.8244	278
	34.0103	279
	34.2207	280
	34.3671	280
	34.5167	280
	34.6724	280
	34.8905	281
	35.0608	281
	35.1992	281
	35.4005	282
	35.599	283
	35.7433	283
	35.8909	283
	36.0582	283
	36.2769	284
	36.4333	284
	36.5814	284
	36.7331	284
	36.8788	284
	37.0895	285
	37.2753	286
	37.4201	286
	37.5655	286
	37.7463	286
	37.96	287
	38.1078	287
	38.2586	287
	38.4078	287
	38.5606	287
	38.7779	288
	38.9507	289
	39.095	288
	39.2484	288
	39.3908	288
	39.5859	289
	39.7897	290
	39.9331	290
	40.0858	290
	40.232	290
	40.3957	290
	40.6148	291
	40.7749	291
	40.9224	291
	41.0728	291
	41.2242	291
	41.3687	291
	41.5757	292
	41.7669	293
	41.9096	293
	42.0617	293
	42.2108	293
	42.3626	293
	42.5067	293
	42.6835	293
	42.8992	294
	43.0495	294
	43.1995	294
	43.3495	294
	43.4996	294
	43.6496	294
	43.7997	294
	43.9497	294
	44.1653	295
	44.3425	296
	44.4865	295
	44.6382	296
	44.7878	296
	44.9381	296
	45.0876	296
	45.2397	296
	45.3824	295
	45.5732	296
	45.7805	297
	45.9251	297
	46.0766	297
	46.2263	297
	46.3764	297
	46.5265	297
	46.6765	297
	46.8266	297
	46.9765	297
	47.1272	297
	47.2748	297
	47.4347	297
	47.6538	298
	47.8175	298
	47.9641	298
	48.1151	298
	48.2649	298
	48.4151	298
	48.5651	298
	48.7152	298
	48.8652	298
	49.0153	298
	49.1653	298
	49.3154	298
	49.4655	298
	49.6155	298
	49.7656	298
	49.9156	298
	50.0657	298
	50.2158	298
	50.3658	298
	50.5159	298
	50.6659	298
	50.816	298
	50.9661	298
	51.1161	298
	51.2662	298
	51.4162	298
	51.5663	298
	51.7164	298
	51.8664	298
	52.0165	298
	52.1665	298
	52.3166	298
	52.4667	298
	52.6167	298
	52.7668	298
	52.9168	298
	53.0669	298
	53.217	298
	53.367	298
	53.5171	298
	53.6671	298
	53.8172	298
	53.9673	298
	54.1173	298
	54.2674	298
	54.4174	298
	54.5675	298
	54.7175	298
	54.8677	298
	55.0173	298
	55.169	298
	55.3129	298
	55.5177	299
	55.7116	300
	55.8543	300
	56.0063	300
	56.1558	300
	56.306	300
	56.4561	300
	56.6061	300
	56.7562	300
	56.9063	300
	57.0563	300
	57.2064	300
	57.3564	300
	57.5065	300
	57.6565	300
	57.8066	300
	57.9567	300
	58.1067	300
	58.2568	300
	58.4068	300
	58.5569	300
	58.707	300
	58.857	300
	59.0071	300
	59.1571	300
	59.3072	300
	59.4573	300
	59.6073	300
	59.7574	300
	59.9074	300
	60.0575	300
	60.2076	300
	60.3576	300
	60.5077	300
	60.6577	300
	60.8078	300
	60.9579	300
	61.1079	300
	61.258	300
	61.408	300
	61.5581	300
	61.7082	300
	61.8582	300
	62.0083	300
	62.1583	300
	62.3084	300
	62.4585	300
	62.6085	300
	62.7586	300
	62.9086	300
	63.0587	300
	63.2087	300
	63.3589	300
	63.5085	300
	63.6601	300
	63.8045	300
	63.98	300
	64.1963	301
	64.3472	301
	64.497	301
	64.6472	301
	64.7972	301
	64.9473	301
	65.0973	301
	65.2474	301
	65.3975	301
	65.5475	301
	65.6976	301
	65.8476	301
	65.9977	301
	66.1478	301
	66.2978	301
	66.4479	301
	66.5979	301
	66.748	301
	66.8981	301
	67.0481	301
	67.1982	301
	67.3482	301
	67.4983	301
	67.6484	301
	67.7984	301
	67.9485	301
	68.0985	301
	68.2486	301
	68.3986	301
	68.5487	301
	68.6988	301
	68.8488	301
	68.9989	301
	69.1489	301
	69.299	301
	69.4491	301
	69.5991	301
	69.7492	301
	69.8992	301
	70.0493	301
	70.1994	301
	70.3494	301
	70.4995	301
	70.6495	301
	70.7996	301
	70.9497	301
	71.0997	301
	71.2498	301
	71.3998	301
	71.5499	301
	71.7	301
	71.85	301
	72.0001	301
	72.1501	301
	72.3002	301
	72.5159	302
	72.6929	303
	72.837	303
	72.9886	303
	73.1383	303
	73.2884	303
	73.4385	303
	73.5885	303
	73.7386	303
	73.8887	303
	74.0387	303
	74.1888	303
	74.3388	303
	74.4889	303
	74.639	303
	74.789	303
	74.9391	303
	75.0891	303
	75.2392	303
	75.3893	303
	75.5393	303
	75.6894	303
	75.8394	303
	75.9895	303
	76.1396	303
	76.2896	303
	76.4397	303
	76.5897	303
	76.7398	303
	76.8899	303
	77.0399	303
	77.19	303
	77.34	303
	77.4901	303
	77.6402	303
	77.7902	303
	77.9403	303
	78.0903	303
	78.2404	303
	78.3904	303
	78.5405	303
	78.6906	303
	78.8406	303
	78.9907	303
	79.1407	303
	79.2908	303
	79.4409	303
	79.5909	303
	79.741	303
	79.891	303
	80.0411	303
	80.1912	303
	80.3412	303
	80.4913	303
	80.6413	303
	80.7914	303
	80.9415	303
	81.0915	303
	81.2416	303
	81.3916	303
	81.5417	303
	81.6918	303
	81.8418	303
	81.9919	303
	82.1419	303
	82.292	303
	82.4421	303
	82.5921	303
	82.7422	303
	82.8922	303
	83.0423	303
	83.1924	303
	83.3424	303
	83.4925	303
	83.6425	303
	83.7926	303
	83.9427	303
	84.0927	303
	84.2428	303
	84.3928	303
	84.5429	303
	84.693	303
	84.843	303
	84.9931	303
	85.1431	303
	85.2932	303
	85.4432	303
	85.5933	303
	85.7434	303
	85.8934	303
	86.0435	303
	86.1936	303
	86.3433	303
	86.4947	303
	86.64	303
	86.8078	303
	86.8527	302
	86.8701	301
	87.035	301
	87.181	301
	87.3322	301
	87.4818	301
	87.6325	301
	87.7805	301
	87.9381	301
	88.0586	301
	88.0417	300
	88.1648	300
	88.3218	300
	88.4698	300
	88.6213	300
	88.7675	300
	88.9317	300
	88.9468	299
	88.9945	298
	89.1623	298
	89.3076	298
	89.459	298
	89.6087	298
	89.7589	298
	89.9087	298
	90.0597	298
	90.2061	298
	90.37	298
	90.4585	298
	90.4487	297
	90.5967	297
	90.7473	297
	90.8973	297
	91.0469	297
	91.1988	297
	91.1923	296
	91.2732	295
	91.4396	296
	91.5809	295
	91.7497	296
	91.804	295
	91.8142	294
	91.975	294
	92.1271	294
	92.2575	294
	92.2408	293
	92.3554	293
	92.5103	293
	92.6737	293
	92.7006	292
	92.7332	291
	92.9129	291
	93.0084	291
	92.9958	290
	93.1343	290
	93.2943	290
	93.292	289
	93.3642	288
	93.5258	288
	93.6883	289
	93.7563	288
	93.7577	287
	93.9152	287
	94.0661	287
	94.2053	287
	94.1906	286
	94.2942	286
	94.4507	286
	94.6164	286
	94.6456	285
	94.6855	284
	94.8116	284
	94.7909	283
	94.9338	283
	94.9441	282
	95.0137	281
	95.1135	281
	95.102	280
	95.2548	280
	95.405	280
	95.5518	280
	95.5379	279
	95.6412	279
	95.7309	278
	95.6902	277
	95.6853	276
	95.8111	276
	95.9821	276
	95.9904	275
	96.0538	274
	96.162	274
	96.1473	273
	96.2955	273
	96.3225	272
	96.2779	271
	96.3135	270
	96.4757	270
	96.6065	270
	96.5919	269
	96.697	269
	96.8749	269
	96.8926	268
	96.942	267
	97.0647	267
	97.0458	266
	97.1798	266
	97.3431	266
	97.3366	265
	97.4235	264
	97.5082	264
	97.5072	263
	97.6554	263
	97.6383	262
	97.7531	262
	97.8026	261
	97.8302	260
	97.9641	260
	97.9446	259
	98.0669	259
	98.2371	259
	98.2383	258
	98.3117	257
	98.41	257
	98.4005	256
	98.5505	256
	98.5392	255
	98.6416	255
	98.7053	254
	98.7205	253
	98.862	253
	98.8443	252
	98.9543	252
	99.1301	252
	99.1405	251
	99.2001	250
	99.3112	250
	99.2953	249
	99.4441	249
	99.4414	248
	99.5285	247
	99.6132	247
	99.6079	246
	99.7724	246
	99.9045	246
	99.8854	245
	100.01	245
	100.057	244
	100.076	243
	100.256	243
	100.356	243
	100.341	242
	100.486	242
	100.501	241
	100.551	240
	100.737	240
	100.802	240
	100.805	239
	100.954	239
	100.938	238
	101.049	238
	101.103	237
	101.127	236
	101.261	236
	101.24	235
	101.376	235
	101.403	234
	101.441	233
	101.625	233
	101.704	233
	101.698	232
	101.848	232
	101.847	231
	101.919	230
	102.104	231
	102.148	230
	102.169	229
	102.309	229
	102.288	228
	102.417	228
	102.448	227
	102.495	226
	102.612	226
	102.594	225
	102.741	225
	102.742	224
	102.826	223
	102.908	223
	102.909	222
	103.057	222
	103.04	221
	103.151	221
	103.233	220
	103.185	219
	103.185	218
	103.335	218
	103.342	217
	103.414	216
	103.51	216
	103.502	215
	103.652	215
	103.639	214
	103.744	214
	103.806	213
	103.821	212
	103.969	212
	103.963	211
	103.917	210
	104.008	209
	104.109	209
	104.096	208
	104.246	208
	104.243	207
	104.327	206
	104.433	206
	104.392	205
	104.375	204
	104.516	204
	104.549	203
	104.588	202
	104.722	202
	104.703	201
	104.701	200
	104.685	199
	104.707	198
	104.856	198
	104.861	197
	104.849	196
	104.843	195
	104.836	194
	104.977	194
	105.028	193
	104.979	192
	104.999	191
	105.149	191
	105.171	190
	105.123	189
	105.172	188
	105.314	188
	105.309	187
	105.292	186
	105.305	185
	105.302	184
	105.274	183
	105.378	182
	105.474	182
	105.448	181
	105.453	180
	105.428	179
	105.487	178
	105.62	178
	105.605	177
	105.593	176
	105.606	175
	105.599	174
	105.576	173
	105.695	172
	105.775	172
	105.746	171
	105.748	170
	105.751	169
	105.75	168
	105.75	167
	105.748	166
	105.755	165
	105.745	164
	105.73	163
	105.863	163
	105.922	162
	105.897	161
	105.902	160
	105.876	159
	105.972	158
	106.074	158
	106.049	157
	106.053	156
	106.029	155
	106.082	154
	106.218	154
	106.205	153
	106.201	152
	106.187	151
	106.2	150
	106.35	150
	106.365	149
	106.343	148
	106.351	147
	106.351	146
	106.35	145
	106.349	144
	106.35	143
	106.357	142
	106.331	141
	106.363	140
	106.51	140
	106.511	139
	106.494	138
	106.501	137
	106.5	136
	106.5	135
	106.5	134
	106.5	133
	106.5	132
	106.498	131
	106.502	130
	106.504	129
	106.475	128
	106.555	127
	106.674	127
	106.651	126
	106.646	125
	106.652	124
	106.65	123
	106.65	122
	106.65	121
	106.65	120
	106.65	119
	106.65	118
	106.65	117
	106.65	116
	106.65	115
	106.65	114
	106.65	113
	106.65	112
	106.65	111
	106.65	110
	106.65	109
	106.65	108
	106.65	107
	106.65	106
	106.649	105
	106.657	104
	106.637	103
	106.644	102
	106.793	102
	106.817	101
	106.793	100
	106.801	99
	106.802	98
	106.793	97
	106.81	96
	106.812	95
	106.666	93
	106.63	92
	106.657	91
	106.65	90
	106.649	89
	106.65	88
	106.65	87
	106.65	86
	106.65	85
	106.65	84
	106.65	83
	106.65	82
	106.65	81
	106.65	80
	106.65	79
	106.65	78
	106.65	77
	106.65	76
	106.65	75
	106.65	74
	106.65	73
	106.652	72
	106.644	71
	106.659	70
	106.664	69
	106.52	68
	106.479	67
	106.507	66
	106.5	65
	106.499	64
	106.501	63
	106.5	62
	106.5	61
	106.502	60
	106.497	59
	106.499	58
	106.525	57
	106.419	56
	106.326	55
	106.352	54
	106.347	53
	106.372	52
	106.31	50
	106.179	49
	106.196	48
	106.205	47
	106.198	46
	106.2	45
	106.202	44
	106.194	43
	106.208	42
	106.216	41
	106.075	40
	106.028	39
	106.057	38
	106.05	37
	106.042	36
	106.07	35
	106.031	34
	105.885	32
	105.886	31
	105.93	30
	105.854	29
	105.725	28
	105.745	27
	105.779	26
	105.675	25
	105.57	23
	105.605	22
	105.625	22
	105.495	20
	105.426	19
	105.456	18
	105.452	17
	105.442	16
	105.466	15
	105.448	14
	105.298	13
	105.285	12
	105.308	11
	105.297	10
	105.294	9
	105.327	8
	105.245	6
	105.139	5
	105.153	4
	105.006	3
	104.975	2
	105.027	1
	104.984	0
	104.839	-2
	104.841	-3
	104.85	-4
	104.859	-5
	104.86	-6
	104.715	-7
	104.674	-8
	104.725	-9
	104.693	-10
	104.546	-11
	104.561	-12
	104.455	-14
	104.368	-15
	104.413	-16
	104.417	-17
	104.273	-18
	104.231	-19
	104.252	-20
	104.25	-21
	104.276	-22
	104.157	-24
	104.096	-25
	104.081	-26
	103.94	-27
	103.96	-28
	103.837	-29
	103.769	-31
	103.818	-31
	103.808	-32
	103.659	-34
	103.626	-35
	103.675	-36
	103.638	-37
	103.491	-38
	103.491	-39
	103.5	-40
	103.509	-41
	103.513	-42
	103.365	-44
	103.355	-45
	103.29	-46
	103.169	-47
	103.202	-48
	103.229	-49
	103.1	-50
	103.048	-52
	103.025	-53
	102.889	-54
	102.909	-55
	102.78	-56
	102.719	-57
	102.771	-58
	102.754	-59
	102.603	-61
	102.609	-62
	102.52	-63
	102.423	-64
	102.453	-65
	102.452	-66
	102.45	-67
	102.447	-68
	102.447	-69
	102.475	-70
	102.378	-71
	102.275	-73
	102.302	-74
	102.303	-75
	102.298	-76
	102.3	-77
	102.3	-78
	102.3	-79
	102.3	-80
	102.3	-81

## Sheet: Supplementary Figure 7
Supplementary Figure 7	Time	Shearing Galvo	Shearing Galvo Shift Value	Shearing Galvo Base
	0	-1.1372	-0.312264	-0.824936
	0.00099999	-1.13715	-0.312236	-0.824919
	0.00199998	-1.13711	-0.312208	-0.824902
	0.00299997	-1.13706	-0.31218	-0.824884
	0.00399996	-1.13702	-0.312152	-0.824867
	0.00499995	-1.13697	-0.312125	-0.824849
	0.00599994	-1.13693	-0.312098	-0.824832
	0.00699993	-1.13689	-0.312071	-0.824815
	0.00799992	-1.13684	-0.312044	-0.824797
	0.00899991	-1.1368	-0.312018	-0.82478
	0.0099999	-1.13675	-0.311992	-0.824763
	0.0109999	-1.13671	-0.311966	-0.824745
	0.0119999	-1.13667	-0.311941	-0.824728
	0.0129999	-1.13663	-0.311916	-0.82471
	0.0139999	-1.13658	-0.311891	-0.824693
	0.0149999	-1.13654	-0.311866	-0.824676
	0.0159998	-1.1365	-0.311842	-0.824658
	0.0169998	-1.13646	-0.311818	-0.824641
	0.0179998	-1.13642	-0.311794	-0.824624
	0.0189998	-1.13638	-0.311771	-0.824606
	0.0199998	-1.13634	-0.311747	-0.824589
	0.0209998	-1.1363	-0.311724	-0.824571
	0.0219998	-1.13626	-0.311702	-0.824554
	0.0229998	-1.13622	-0.311679	-0.824537
	0.0239998	-1.13618	-0.311657	-0.824519
	0.0249998	-1.13614	-0.311635	-0.824502
	0.0259997	-1.1361	-0.311613	-0.824485
	0.0269997	-1.13606	-0.311592	-0.824467
	0.0279997	-1.13602	-0.31157	-0.82445
	0.0289997	-1.13598	-0.311549	-0.824432
	0.0299997	-1.13594	-0.311529	-0.824415
	0.0309997	-1.13591	-0.311508	-0.824398
	0.0319997	-1.13587	-0.311488	-0.82438
	0.0329997	-1.13583	-0.311468	-0.824363
	0.0339997	-1.13579	-0.311448	-0.824346
	0.0349997	-1.13576	-0.311428	-0.824328
	0.0359996	-1.13572	-0.311409	-0.824311
	0.0369996	-1.13568	-0.31139	-0.824293
	0.0379996	-1.13565	-0.311371	-0.824276
	0.0389996	-1.13561	-0.311352	-0.824259
	0.0399996	-1.13557	-0.311333	-0.824241
	0.0409996	-1.13554	-0.311315	-0.824224
	0.0419996	-1.1355	-0.311297	-0.824207
	0.0429996	-1.13547	-0.311279	-0.824189
	0.0439996	-1.13543	-0.311261	-0.824172
	0.0449996	-1.1354	-0.311244	-0.824154
	0.0459995	-1.13536	-0.311226	-0.824137
	0.0469995	-1.13533	-0.311209	-0.82412
	0.0479995	-1.13529	-0.311192	-0.824102
	0.0489995	-1.13526	-0.311176	-0.824085
	0.0499995	-1.13523	-0.311159	-0.824068
	0.0509995	-1.13519	-0.311143	-0.82405
	0.0519995	-1.13516	-0.311127	-0.824033
	0.0529995	-1.13513	-0.311111	-0.824015
	0.0539995	-1.13509	-0.311095	-0.823998
	0.0549995	-1.13506	-0.311079	-0.823981
	0.0559994	-1.13503	-0.311064	-0.823963
	0.0569994	-1.13499	-0.311049	-0.823946
	0.0579994	-1.13496	-0.311034	-0.823929
	0.0589994	-1.13493	-0.311019	-0.823911
	0.0599994	-1.1349	-0.311004	-0.823894
	0.0609994	-1.13487	-0.310989	-0.823876
	0.0619994	-1.13483	-0.310975	-0.823859
	0.0629994	-1.1348	-0.310961	-0.823842
	0.0639994	-1.13477	-0.310947	-0.823824
	0.0649994	-1.13474	-0.310933	-0.823807
	0.0659993	-1.13471	-0.310919	-0.82379
	0.0669993	-1.13468	-0.310905	-0.823772
	0.0679993	-1.13465	-0.310892	-0.823755
	0.0689993	-1.13462	-0.310879	-0.823738
	0.0699993	-1.13459	-0.310866	-0.82372
	0.0709993	-1.13456	-0.310853	-0.823703
	0.0719993	-1.13453	-0.31084	-0.823685
	0.0729993	-1.13449	-0.310827	-0.823668
	0.0739993	-1.13446	-0.310814	-0.823651
	0.0749993	-1.13444	-0.310802	-0.823633
	0.0759992	-1.13441	-0.31079	-0.823616
	0.0769992	-1.13438	-0.310777	-0.823599
	0.0779992	-1.13435	-0.310765	-0.823581
	0.0789992	-1.13432	-0.310753	-0.823564
	0.0799992	-1.13429	-0.310742	-0.823546
	0.0809992	-1.13426	-0.31073	-0.823529
	0.0819992	-1.13423	-0.310718	-0.823512
	0.0829992	-1.1342	-0.310707	-0.823494
	0.0839992	-1.13417	-0.310696	-0.823477
	0.0849992	-1.13414	-0.310685	-0.82346
	0.0859991	-1.13412	-0.310673	-0.823442
	0.0869991	-1.13409	-0.310662	-0.823425
	0.0879991	-1.13406	-0.310652	-0.823407
	0.0889991	-1.13403	-0.310641	-0.82339
	0.0899991	-1.134	-0.31063	-0.823373
	0.0909991	-1.13397	-0.31062	-0.823355
	0.0919991	-1.13395	-0.310609	-0.823338
	0.0929991	-1.13392	-0.310599	-0.823321
	0.0939991	-1.13389	-0.310589	-0.823303
	0.0949991	-1.13386	-0.310578	-0.823286
	0.095999	-1.13384	-0.310568	-0.823268
	0.096999	-1.13381	-0.310558	-0.823251
	0.097999	-1.13378	-0.310548	-0.823234
	0.098999	-1.13375	-0.310538	-0.823216
	0.099999	-1.13373	-0.310529	-0.823199
	0.100999	-1.1337	-0.310519	-0.823182
	0.101999	-1.13367	-0.310509	-0.823164
	0.102999	-1.13365	-0.3105	-0.823147
	0.103999	-1.13362	-0.31049	-0.823129
	0.104999	-1.13359	-0.310481	-0.823112
	0.105999	-1.13357	-0.310472	-0.823095
	0.106999	-1.13354	-0.310463	-0.823077
	0.107999	-1.13351	-0.310453	-0.82306
	0.108999	-1.13349	-0.310444	-0.823043
	0.109999	-1.13346	-0.310435	-0.823025
	0.110999	-1.13343	-0.310426	-0.823008
	0.111999	-1.13341	-0.310417	-0.82299
	0.112999	-1.13338	-0.310408	-0.822973
	0.113999	-1.13335	-0.310399	-0.822956
	0.114999	-1.13333	-0.31039	-0.822938
	0.115999	-1.1333	-0.310381	-0.822921
	0.116999	-1.13328	-0.310372	-0.822904
	0.117999	-1.13325	-0.310363	-0.822886
	0.118999	-1.13322	-0.310354	-0.822869
	0.119999	-1.1332	-0.310344	-0.822851
	0.120999	-1.13317	-0.310335	-0.822834
	0.121999	-1.13314	-0.310326	-0.822817
	0.122999	-1.13312	-0.310316	-0.822799
	0.123999	-1.13309	-0.310307	-0.822782
	0.124999	-1.13306	-0.310297	-0.822765
	0.125999	-1.13304	-0.310288	-0.822747
	0.126999	-1.13301	-0.310278	-0.82273
	0.127999	-1.13298	-0.310268	-0.822712
	0.128999	-1.13295	-0.310258	-0.822695
	0.129999	-1.13293	-0.310248	-0.822678
	0.130999	-1.1329	-0.310238	-0.82266
	0.131999	-1.13287	-0.310227	-0.822643
	0.132999	-1.13284	-0.310217	-0.822626
	0.133999	-1.13281	-0.310206	-0.822608
	0.134999	-1.13279	-0.310195	-0.822591
	0.135999	-1.13276	-0.310184	-0.822573
	0.136999	-1.13273	-0.310173	-0.822556
	0.137999	-1.1327	-0.310162	-0.822539
	0.138999	-1.13267	-0.31015	-0.822521
	0.139999	-1.13264	-0.310138	-0.822504
	0.140999	-1.13261	-0.310126	-0.822487
	0.141999	-1.13258	-0.310113	-0.822469
	0.142999	-1.13255	-0.310101	-0.822452
	0.143999	-1.13252	-0.310088	-0.822434
	0.144999	-1.13249	-0.310075	-0.822417
	0.145999	-1.13246	-0.310062	-0.8224
	0.146999	-1.13243	-0.310048	-0.822382
	0.147999	-1.1324	-0.310034	-0.822365
	0.148999	-1.13237	-0.31002	-0.822348
	0.149999	-1.13234	-0.310005	-0.82233
	0.150998	-1.1323	-0.30999	-0.822313
	0.151998	-1.13227	-0.309975	-0.822295
	0.152998	-1.13224	-0.30996	-0.822278
	0.153998	-1.1322	-0.309944	-0.822261
	0.154998	-1.13217	-0.309928	-0.822243
	0.155998	-1.13214	-0.309911	-0.822226
	0.156998	-1.1321	-0.309894	-0.822209
	0.157998	-1.13207	-0.309877	-0.822191
	0.158998	-1.13203	-0.30986	-0.822174
	0.159998	-1.132	-0.309842	-0.822156
	0.160998	-1.13196	-0.309823	-0.822139
	0.161998	-1.13193	-0.309804	-0.822122
	0.162998	-1.13189	-0.309785	-0.822104
	0.163998	-1.13185	-0.309766	-0.822087
	0.164998	-1.13182	-0.309745	-0.82207
	0.165998	-1.13178	-0.309725	-0.822052
	0.166998	-1.13174	-0.309704	-0.822035
	0.167998	-1.1317	-0.309683	-0.822017
	0.168998	-1.13166	-0.309661	-0.822
	0.169998	-1.13162	-0.309638	-0.821983
	0.170998	-1.13158	-0.309616	-0.821965
	0.171998	-1.13154	-0.309592	-0.821948
	0.172998	-1.1315	-0.309569	-0.821931
	0.173998	-1.13146	-0.309545	-0.821913
	0.174998	-1.13142	-0.309521	-0.821896
	0.175998	-1.13137	-0.309496	-0.821878
	0.176998	-1.13133	-0.309471	-0.821861
	0.177998	-1.13129	-0.309445	-0.821844
	0.178998	-1.13125	-0.30942	-0.821826
	0.179998	-1.1312	-0.309394	-0.821809
	0.180998	-1.13116	-0.309368	-0.821792
	0.181998	-1.13112	-0.309341	-0.821774
	0.182998	-1.13107	-0.309314	-0.821757
	0.183998	-1.13103	-0.309287	-0.821739
	0.184998	-1.13098	-0.30926	-0.821722
	0.185998	-1.13094	-0.309233	-0.821705
	0.186998	-1.13089	-0.309205	-0.821687
	0.187998	-1.13085	-0.309178	-0.82167
	0.188998	-1.1308	-0.30915	-0.821653
	0.189998	-1.13076	-0.309122	-0.821635
	0.190998	-1.13071	-0.309094	-0.821618
	0.191998	-1.13067	-0.309066	-0.8216
	0.192998	-1.13062	-0.309037	-0.821583
	0.193998	-1.13057	-0.309009	-0.821566
	0.194998	-1.13053	-0.308981	-0.821548
	0.195998	-1.13048	-0.308952	-0.821531
	0.196998	-1.13044	-0.308924	-0.821514
	0.197998	-1.13039	-0.308896	-0.821496
	0.198998	-1.13035	-0.308867	-0.821479
	0.199998	-1.1303	-0.308839	-0.821462
	0.200998	-1.13026	-0.308811	-0.821444
	0.201998	-1.13021	-0.308783	-0.821427
	0.202998	-1.13016	-0.308755	-0.821409
	0.203998	-1.13012	-0.308727	-0.821392
	0.204998	-1.13007	-0.308699	-0.821375
	0.205998	-1.13003	-0.308671	-0.821357
	0.206998	-1.12998	-0.308644	-0.82134
	0.207998	-1.12994	-0.308617	-0.821323
	0.208998	-1.12989	-0.308589	-0.821305
	0.209998	-1.12985	-0.308562	-0.821288
	0.210998	-1.12981	-0.308536	-0.82127
	0.211998	-1.12976	-0.308509	-0.821253
	0.212998	-1.12972	-0.308483	-0.821236
	0.213998	-1.12968	-0.308457	-0.821218
	0.214998	-1.12963	-0.308432	-0.821201
	0.215998	-1.12959	-0.308406	-0.821184
	0.216998	-1.12955	-0.308381	-0.821166
	0.217998	-1.12951	-0.308357	-0.821149
	0.218998	-1.12946	-0.308332	-0.821131
	0.219998	-1.12942	-0.308308	-0.821114
	0.220998	-1.12938	-0.308285	-0.821097
	0.221998	-1.12934	-0.308262	-0.821079
	0.222998	-1.1293	-0.308239	-0.821062
	0.223998	-1.12926	-0.308217	-0.821045
	0.224998	-1.12922	-0.308195	-0.821027
	0.225998	-1.12918	-0.308174	-0.82101
	0.226998	-1.12915	-0.308153	-0.820992
	0.227998	-1.12911	-0.308133	-0.820975
	0.228998	-1.12907	-0.308113	-0.820958
	0.229998	-1.12903	-0.308094	-0.82094
	0.230998	-1.129	-0.308075	-0.820923
	0.231998	-1.12896	-0.308057	-0.820906
	0.232998	-1.12893	-0.30804	-0.820888
	0.233998	-1.12889	-0.308022	-0.820871
	0.234998	-1.12886	-0.308006	-0.820853
	0.235998	-1.12883	-0.30799	-0.820836
	0.236998	-1.12879	-0.307974	-0.820819
	0.237998	-1.12876	-0.307959	-0.820801
	0.238998	-1.12873	-0.307945	-0.820784
	0.239998	-1.1287	-0.307931	-0.820767
	0.240998	-1.12867	-0.307917	-0.820749
	0.241998	-1.12864	-0.307903	-0.820732
	0.242998	-1.1286	-0.30789	-0.820714
	0.243998	-1.12857	-0.307878	-0.820697
	0.244998	-1.12854	-0.307865	-0.82068
	0.245998	-1.12852	-0.307853	-0.820662
	0.246998	-1.12849	-0.307841	-0.820645
	0.247998	-1.12846	-0.30783	-0.820628
	0.248998	-1.12843	-0.307818	-0.82061
	0.249998	-1.1284	-0.307807	-0.820593
	0.250997	-1.12837	-0.307797	-0.820575
	0.251997	-1.12834	-0.307786	-0.820558
	0.252997	-1.12832	-0.307776	-0.820541
	0.253997	-1.12829	-0.307765	-0.820523
	0.254997	-1.12826	-0.307755	-0.820506
	0.255997	-1.12823	-0.307745	-0.820489
	0.256997	-1.12821	-0.307735	-0.820471
	0.257997	-1.12818	-0.307725	-0.820454
	0.258997	-1.12815	-0.307715	-0.820436
	0.259997	-1.12812	-0.307706	-0.820419
	0.260997	-1.1281	-0.307696	-0.820402
	0.261997	-1.12807	-0.307686	-0.820384
	0.262997	-1.12804	-0.307676	-0.820367
	0.263997	-1.12802	-0.307667	-0.82035
	0.264997	-1.12799	-0.307657	-0.820332
	0.265997	-1.12796	-0.307647	-0.820315
	0.266997	-1.12793	-0.307637	-0.820297
	0.267997	-1.12791	-0.307627	-0.82028
	0.268997	-1.12788	-0.307617	-0.820263
	0.269997	-1.12785	-0.307606	-0.820245
	0.270997	-1.12782	-0.307596	-0.820228
	0.271997	-1.1278	-0.307585	-0.820211
	0.272997	-1.12777	-0.307574	-0.820193
	0.273997	-1.12774	-0.307563	-0.820176
	0.274997	-1.12771	-0.307552	-0.820158
	0.275997	-1.12768	-0.30754	-0.820141
	0.276997	-1.12765	-0.307528	-0.820124
	0.277997	-1.12762	-0.307516	-0.820106
	0.278997	-1.12759	-0.307504	-0.820089
	0.279997	-1.12756	-0.307491	-0.820072
	0.280997	-1.12753	-0.307478	-0.820054
	0.281997	-1.1275	-0.307464	-0.820037
	0.282997	-1.12747	-0.30745	-0.820019
	0.283997	-1.12744	-0.307436	-0.820002
	0.284997	-1.12741	-0.307421	-0.819985
	0.285997	-1.12737	-0.307406	-0.819967
	0.286997	-1.12734	-0.30739	-0.81995
	0.287997	-1.12731	-0.307374	-0.819933
	0.288997	-1.12727	-0.307358	-0.819915
	0.289997	-1.12724	-0.30734	-0.819898
	0.290997	-1.1272	-0.307323	-0.81988
	0.291997	-1.12717	-0.307305	-0.819863
	0.292997	-1.12713	-0.307286	-0.819846
	0.293997	-1.12709	-0.307266	-0.819828
	0.294997	-1.12706	-0.307246	-0.819811
	0.295997	-1.12702	-0.307226	-0.819794
	0.296997	-1.12698	-0.307205	-0.819776
	0.297997	-1.12694	-0.307183	-0.819759
	0.298997	-1.1269	-0.307161	-0.819741
	0.299997	-1.12686	-0.307138	-0.819724
	0.300997	-1.12682	-0.307115	-0.819707
	0.301997	-1.12678	-0.307091	-0.819689
	0.302997	-1.12674	-0.307067	-0.819672
	0.303997	-1.1267	-0.307043	-0.819655
	0.304997	-1.12666	-0.307018	-0.819637
	0.305997	-1.12661	-0.306993	-0.81962
	0.306997	-1.12657	-0.306967	-0.819602
	0.307997	-1.12653	-0.306942	-0.819585
	0.308997	-1.12648	-0.306915	-0.819568
	0.309997	-1.12644	-0.306889	-0.81955
	0.310997	-1.1264	-0.306862	-0.819533
	0.311997	-1.12635	-0.306835	-0.819516
	0.312997	-1.12631	-0.306808	-0.819498
	0.313997	-1.12626	-0.30678	-0.819481
	0.314997	-1.12622	-0.306752	-0.819463
	0.315997	-1.12617	-0.306725	-0.819446
	0.316997	-1.12613	-0.306697	-0.819429
	0.317997	-1.12608	-0.306668	-0.819411
	0.318997	-1.12603	-0.30664	-0.819394
	0.319997	-1.12599	-0.306612	-0.819377
	0.320997	-1.12594	-0.306583	-0.819359
	0.321997	-1.1259	-0.306554	-0.819342
	0.322997	-1.12585	-0.306526	-0.819325
	0.323997	-1.1258	-0.306497	-0.819307
	0.324997	-1.12576	-0.306468	-0.81929
	0.325997	-1.12571	-0.30644	-0.819272
	0.326997	-1.12567	-0.306411	-0.819255
	0.327997	-1.12562	-0.306383	-0.819238
	0.328997	-1.12557	-0.306354	-0.81922
	0.329997	-1.12553	-0.306326	-0.819203
	0.330997	-1.12548	-0.306297	-0.819186
	0.331997	-1.12544	-0.306269	-0.819168
	0.332997	-1.12539	-0.306241	-0.819151
	0.333997	-1.12535	-0.306213	-0.819133
	0.334997	-1.1253	-0.306185	-0.819116
	0.335997	-1.12526	-0.306158	-0.819099
	0.336997	-1.12521	-0.306131	-0.819081
	0.337997	-1.12517	-0.306103	-0.819064
	0.338997	-1.12512	-0.306077	-0.819047
	0.339997	-1.12508	-0.30605	-0.819029
	0.340997	-1.12504	-0.306024	-0.819012
	0.341997	-1.12499	-0.305998	-0.818994
	0.342997	-1.12495	-0.305972	-0.818977
	0.343997	-1.12491	-0.305947	-0.81896
	0.344997	-1.12486	-0.305922	-0.818942
	0.345997	-1.12482	-0.305898	-0.818925
	0.346997	-1.12478	-0.305874	-0.818908
	0.347997	-1.12474	-0.30585	-0.81889
	0.348997	-1.1247	-0.305827	-0.818873
	0.349997	-1.12466	-0.305804	-0.818855
	0.350996	-1.12462	-0.305782	-0.818838
	0.351996	-1.12458	-0.30576	-0.818821
	0.352996	-1.12454	-0.305739	-0.818803
	0.353996	-1.1245	-0.305719	-0.818786
	0.354996	-1.12447	-0.305699	-0.818769
	0.355996	-1.12443	-0.305679	-0.818751
	0.356996	-1.12439	-0.30566	-0.818734
	0.357996	-1.12436	-0.305642	-0.818716
	0.358996	-1.12432	-0.305624	-0.818699
	0.359996	-1.12429	-0.305607	-0.818682
	0.360996	-1.12425	-0.30559	-0.818664
	0.361996	-1.12422	-0.305574	-0.818647
	0.362996	-1.12419	-0.305558	-0.81863
	0.363996	-1.12416	-0.305543	-0.818612
	0.364996	-1.12412	-0.305528	-0.818595
	0.365996	-1.12409	-0.305514	-0.818577
	0.366996	-1.12406	-0.3055	-0.81856
	0.367996	-1.12403	-0.305486	-0.818543
	0.368996	-1.124	-0.305473	-0.818525
	0.369996	-1.12397	-0.30546	-0.818508
	0.370996	-1.12394	-0.305448	-0.818491
	0.371996	-1.12391	-0.305435	-0.818473
	0.372996	-1.12388	-0.305424	-0.818456
	0.373996	-1.12385	-0.305412	-0.818438
	0.374996	-1.12382	-0.305401	-0.818421
	0.375996	-1.12379	-0.305389	-0.818404
	0.376996	-1.12376	-0.305378	-0.818386
	0.377996	-1.12374	-0.305368	-0.818369
	0.378996	-1.12371	-0.305357	-0.818352
	0.379996	-1.12368	-0.305347	-0.818334
	0.380996	-1.12365	-0.305337	-0.818317
	0.381996	-1.12363	-0.305326	-0.818299
	0.382996	-1.1236	-0.305316	-0.818282
	0.383996	-1.12357	-0.305307	-0.818265
	0.384996	-1.12354	-0.305297	-0.818247
	0.385996	-1.12352	-0.305287	-0.81823
	0.386996	-1.12349	-0.305277	-0.818213
	0.387996	-1.12346	-0.305267	-0.818195
	0.388996	-1.12344	-0.305258	-0.818178
	0.389996	-1.12341	-0.305248	-0.81816
	0.390996	-1.12338	-0.305238	-0.818143
	0.391996	-1.12335	-0.305228	-0.818126
	0.392996	-1.12333	-0.305218	-0.818108
	0.393996	-1.1233	-0.305208	-0.818091
	0.394996	-1.12327	-0.305198	-0.818074
	0.395996	-1.12324	-0.305188	-0.818056
	0.396996	-1.12322	-0.305177	-0.818039
	0.397996	-1.12319	-0.305167	-0.818021
	0.398996	-1.12316	-0.305156	-0.818004
	0.399996	-1.12313	-0.305145	-0.817987
	0.400996	-1.1231	-0.305134	-0.817969
	0.401996	-1.12307	-0.305122	-0.817952
	0.402996	-1.12305	-0.305111	-0.817935
	0.403996	-1.12302	-0.305098	-0.817917
	0.404996	-1.12299	-0.305086	-0.8179
	0.405996	-1.12296	-0.305073	-0.817882
	0.406996	-1.12293	-0.30506	-0.817865
	0.407996	-1.12289	-0.305047	-0.817848
	0.408996	-1.12286	-0.305033	-0.81783
	0.409996	-1.12283	-0.305019	-0.817813
	0.410996	-1.1228	-0.305005	-0.817796
	0.411996	-1.12277	-0.30499	-0.817778
	0.412996	-1.12274	-0.304974	-0.817761
	0.413996	-1.1227	-0.304958	-0.817743
	0.414996	-1.12267	-0.304942	-0.817726
	0.415996	-1.12263	-0.304925	-0.817709
	0.416996	-1.1226	-0.304908	-0.817691
	0.417996	-1.12256	-0.30489	-0.817674
	0.418996	-1.12253	-0.304871	-0.817657
	0.419996	-1.12249	-0.304852	-0.817639
	0.420996	-1.12245	-0.304832	-0.817622
	0.421996	-1.12242	-0.304812	-0.817604
	0.422996	-1.12238	-0.304791	-0.817587
	0.423996	-1.12234	-0.30477	-0.81757
	0.424996	-1.1223	-0.304749	-0.817552
	0.425996	-1.12226	-0.304726	-0.817535
	0.426996	-1.12222	-0.304704	-0.817518
	0.427996	-1.12218	-0.304681	-0.8175
	0.428996	-1.12214	-0.304658	-0.817483
	0.429996	-1.1221	-0.304634	-0.817465
	0.430996	-1.12206	-0.30461	-0.817448
	0.431996	-1.12202	-0.304585	-0.817431
	0.432996	-1.12197	-0.30456	-0.817413
	0.433996	-1.12193	-0.304535	-0.817396
	0.434996	-1.12189	-0.30451	-0.817379
	0.435996	-1.12185	-0.304484	-0.817361
	0.436996	-1.1218	-0.304458	-0.817344
	0.437996	-1.12176	-0.304431	-0.817326
	0.438996	-1.12171	-0.304405	-0.817309
	0.439996	-1.12167	-0.304378	-0.817292
	0.440996	-1.12163	-0.304351	-0.817274
	0.441996	-1.12158	-0.304324	-0.817257
	0.442996	-1.12154	-0.304296	-0.81724
	0.443996	-1.12149	-0.304269	-0.817222
	0.444996	-1.12145	-0.304241	-0.817205
	0.445996	-1.1214	-0.304213	-0.817187
	0.446996	-1.12136	-0.304185	-0.81717
	0.447996	-1.12131	-0.304157	-0.817153
	0.448996	-1.12126	-0.304129	-0.817135
	0.449996	-1.12122	-0.304101	-0.817118
	0.450995	-1.12117	-0.304073	-0.817101
	0.451995	-1.12113	-0.304044	-0.817083
	0.452995	-1.12108	-0.304016	-0.817066
	0.453995	-1.12104	-0.303988	-0.817049
	0.454995	-1.12099	-0.303959	-0.817031
	0.455995	-1.12094	-0.303931	-0.817014
	0.456995	-1.1209	-0.303903	-0.816996
	0.457995	-1.12085	-0.303875	-0.816979
	0.458995	-1.12081	-0.303847	-0.816962
	0.459995	-1.12076	-0.303819	-0.816944
	0.460995	-1.12072	-0.303791	-0.816927
	0.461995	-1.12067	-0.303763	-0.81691
	0.462995	-1.12063	-0.303736	-0.816892
	0.463995	-1.12058	-0.303708	-0.816875
	0.464995	-1.12054	-0.303681	-0.816857
	0.465995	-1.12049	-0.303654	-0.81684
	0.466995	-1.12045	-0.303627	-0.816823
	0.467995	-1.12041	-0.3036	-0.816805
	0.468995	-1.12036	-0.303574	-0.816788
	0.469995	-1.12032	-0.303548	-0.816771
	0.470995	-1.12028	-0.303522	-0.816753
	0.471995	-1.12023	-0.303496	-0.816736
	0.472995	-1.12019	-0.303471	-0.816718
	0.473995	-1.12015	-0.303446	-0.816701
	0.474995	-1.12011	-0.303422	-0.816684
	0.475995	-1.12006	-0.303397	-0.816666
	0.476995	-1.12002	-0.303374	-0.816649
	0.477995	-1.11998	-0.30335	-0.816632
	0.478995	-1.11994	-0.303327	-0.816614
	0.479995	-1.1199	-0.303304	-0.816597
	0.480995	-1.11986	-0.303282	-0.816579
	0.481995	-1.11982	-0.30326	-0.816562
	0.482995	-1.11978	-0.303239	-0.816545
	0.483995	-1.11975	-0.303218	-0.816527
	0.484995	-1.11971	-0.303198	-0.81651
	0.485995	-1.11967	-0.303178	-0.816493
	0.486995	-1.11963	-0.303158	-0.816475
	0.487995	-1.1196	-0.303139	-0.816458
	0.488995	-1.11956	-0.30312	-0.81644
	0.489995	-1.11952	-0.303102	-0.816423
	0.490995	-1.11949	-0.303084	-0.816406
	0.491995	-1.11945	-0.303066	-0.816388
	0.492995	-1.11942	-0.303049	-0.816371
	0.493995	-1.11939	-0.303032	-0.816354
	0.494995	-1.11935	-0.303015	-0.816336
	0.495995	-1.11932	-0.302999	-0.816319
	0.496995	-1.11928	-0.302983	-0.816301
	0.497995	-1.11925	-0.302967	-0.816284
	0.498995	-1.11922	-0.302952	-0.816267
	0.499995	-1.11919	-0.302937	-0.816249
	0.500995	-1.11915	-0.302922	-0.816232
	0.501995	-1.11912	-0.302908	-0.816215
	0.502995	-1.11909	-0.302894	-0.816197
	0.503995	-1.11906	-0.30288	-0.81618
	0.504995	-1.11903	-0.302867	-0.816162
	0.505995	-1.119	-0.302854	-0.816145
	0.506995	-1.11897	-0.302841	-0.816128
	0.507995	-1.11894	-0.302828	-0.81611
	0.508995	-1.11891	-0.302816	-0.816093
	0.509995	-1.11888	-0.302803	-0.816076
	0.510995	-1.11885	-0.302792	-0.816058
	0.511995	-1.11882	-0.30278	-0.816041
	0.512995	-1.11879	-0.302768	-0.816023
	0.513995	-1.11876	-0.302757	-0.816006
	0.514995	-1.11873	-0.302746	-0.815989
	0.515995	-1.11871	-0.302735	-0.815971
	0.516995	-1.11868	-0.302725	-0.815954
	0.517995	-1.11865	-0.302714	-0.815937
	0.518995	-1.11862	-0.302704	-0.815919
	0.519995	-1.1186	-0.302694	-0.815902
	0.520995	-1.11857	-0.302684	-0.815884
	0.521995	-1.11854	-0.302674	-0.815867
	0.522995	-1.11851	-0.302664	-0.81585
	0.523995	-1.11849	-0.302655	-0.815832
	0.524995	-1.11846	-0.302645	-0.815815
	0.525995	-1.11843	-0.302636	-0.815798
	0.526995	-1.11841	-0.302627	-0.81578
	0.527995	-1.11838	-0.302618	-0.815763
	0.528995	-1.11835	-0.302609	-0.815745
	0.529995	-1.11833	-0.302601	-0.815728
	0.530995	-1.1183	-0.302592	-0.815711
	0.531995	-1.11828	-0.302583	-0.815693
	0.532995	-1.11825	-0.302575	-0.815676
	0.533995	-1.11822	-0.302566	-0.815659
	0.534995	-1.1182	-0.302558	-0.815641
	0.535995	-1.11817	-0.30255	-0.815624
	0.536995	-1.11815	-0.302541	-0.815606
	0.537995	-1.11812	-0.302533	-0.815589
	0.538995	-1.1181	-0.302525	-0.815572
	0.539995	-1.11807	-0.302517	-0.815554
	0.540995	-1.11805	-0.302509	-0.815537
	0.541995	-1.11802	-0.3025	-0.81552
	0.542995	-1.11799	-0.302492	-0.815502
	0.543995	-1.11797	-0.302484	-0.815485
	0.544995	-1.11794	-0.302476	-0.815467
	0.545995	-1.11792	-0.302468	-0.81545
	0.546995	-1.11789	-0.30246	-0.815433
	0.547995	-1.11787	-0.302452	-0.815415
	0.548995	-1.11784	-0.302443	-0.815398
	0.549995	-1.11782	-0.302435	-0.815381
	0.550994	-1.11779	-0.302427	-0.815363
	0.551994	-1.11776	-0.302418	-0.815346
	0.552994	-1.11774	-0.30241	-0.815328
	0.553994	-1.11771	-0.302401	-0.815311
	0.554994	-1.11769	-0.302393	-0.815294
	0.555994	-1.11766	-0.302384	-0.815276
	0.556994	-1.11763	-0.302375	-0.815259
	0.557994	-1.11761	-0.302367	-0.815242
	0.558994	-1.11758	-0.302358	-0.815224
	0.559994	-1.11756	-0.302349	-0.815207
	0.560994	-1.11753	-0.302339	-0.815189
	0.561994	-1.1175	-0.30233	-0.815172
	0.562994	-1.11748	-0.30232	-0.815155
	0.563994	-1.11745	-0.302311	-0.815137
	0.564994	-1.11742	-0.302301	-0.81512
	0.565994	-1.11739	-0.302291	-0.815103
	0.566994	-1.11737	-0.302281	-0.815085
	0.567994	-1.11734	-0.302271	-0.815068
	0.568994	-1.11731	-0.30226	-0.81505
	0.569994	-1.11728	-0.30225	-0.815033
	0.570994	-1.11725	-0.302239	-0.815016
	0.571994	-1.11723	-0.302228	-0.814998
	0.572994	-1.1172	-0.302217	-0.814981
	0.573994	-1.11717	-0.302205	-0.814964
	0.574994	-1.11714	-0.302194	-0.814946
	0.575994	-1.11711	-0.302182	-0.814929
	0.576994	-1.11708	-0.30217	-0.814911
	0.577994	-1.11705	-0.302157	-0.814894
	0.578994	-1.11702	-0.302145	-0.814877
	0.579994	-1.11699	-0.302132	-0.814859
	0.580994	-1.11696	-0.302119	-0.814842
	0.581994	-1.11693	-0.302105	-0.814825
	0.582994	-1.1169	-0.302092	-0.814807
	0.583994	-1.11687	-0.302078	-0.81479
	0.584994	-1.11684	-0.302063	-0.814773
	0.585994	-1.1168	-0.302049	-0.814755
	0.586994	-1.11677	-0.302034	-0.814738
	0.587994	-1.11674	-0.302019	-0.81472
	0.588994	-1.11671	-0.302003	-0.814703
	0.589994	-1.11667	-0.301988	-0.814686
	0.590994	-1.11664	-0.301971	-0.814668
	0.591994	-1.11661	-0.301955	-0.814651
	0.592994	-1.11657	-0.301938	-0.814634
	0.593994	-1.11654	-0.301921	-0.814616
	0.594994	-1.1165	-0.301903	-0.814599
	0.595994	-1.11647	-0.301885	-0.814581
	0.596994	-1.11643	-0.301867	-0.814564
	0.597994	-1.11639	-0.301848	-0.814547
	0.598994	-1.11636	-0.301829	-0.814529
	0.599994	-1.11632	-0.30181	-0.814512
	0.600994	-1.11628	-0.30179	-0.814495
	0.601994	-1.11625	-0.30177	-0.814477
	0.602994	-1.11621	-0.301749	-0.81446
	0.603994	-1.11617	-0.301728	-0.814442
	0.604994	-1.11613	-0.301706	-0.814425
	0.605994	-1.11609	-0.301684	-0.814408
	0.606994	-1.11605	-0.301662	-0.81439
	0.607994	-1.11601	-0.301639	-0.814373
	0.608994	-1.11597	-0.301615	-0.814356
	0.609994	-1.11593	-0.301592	-0.814338
	0.610994	-1.11589	-0.301568	-0.814321
	0.611994	-1.11585	-0.301543	-0.814303
	0.612994	-1.1158	-0.301518	-0.814286
	0.613994	-1.11576	-0.301493	-0.814269
	0.614994	-1.11572	-0.301468	-0.814251
	0.615994	-1.11568	-0.301442	-0.814234
	0.616994	-1.11563	-0.301416	-0.814217
	0.617994	-1.11559	-0.30139	-0.814199
	0.618994	-1.11555	-0.301363	-0.814182
	0.619994	-1.1155	-0.301337	-0.814164
	0.620994	-1.11546	-0.30131	-0.814147
	0.621994	-1.11541	-0.301283	-0.81413
	0.622994	-1.11537	-0.301255	-0.814112
	0.623994	-1.11532	-0.301228	-0.814095
	0.624994	-1.11528	-0.3012	-0.814078
	0.625994	-1.11523	-0.301172	-0.81406
	0.626994	-1.11519	-0.301145	-0.814043
	0.627994	-1.11514	-0.301117	-0.814025
	0.628994	-1.1151	-0.301088	-0.814008
	0.629994	-1.11505	-0.30106	-0.813991
	0.630994	-1.11501	-0.301032	-0.813973
	0.631994	-1.11496	-0.301004	-0.813956
	0.632994	-1.11491	-0.300976	-0.813939
	0.633994	-1.11487	-0.300947	-0.813921
	0.634994	-1.11482	-0.300919	-0.813904
	0.635994	-1.11478	-0.300891	-0.813886
	0.636994	-1.11473	-0.300863	-0.813869
	0.637994	-1.11469	-0.300835	-0.813852
	0.638994	-1.11464	-0.300806	-0.813834
	0.639994	-1.1146	-0.300779	-0.813817
	0.640994	-1.11455	-0.300751	-0.8138
	0.641994	-1.11451	-0.300723	-0.813782
	0.642994	-1.11446	-0.300695	-0.813765
	0.643994	-1.11442	-0.300668	-0.813747
	0.644994	-1.11437	-0.300641	-0.81373
	0.645994	-1.11433	-0.300614	-0.813713
	0.646994	-1.11428	-0.300587	-0.813695
	0.647994	-1.11424	-0.30056	-0.813678
	0.648994	-1.11419	-0.300534	-0.813661
	0.649994	-1.11415	-0.300507	-0.813643
	0.650993	-1.11411	-0.300482	-0.813626
	0.651993	-1.11406	-0.300456	-0.813608
	0.652993	-1.11402	-0.300431	-0.813591
	0.653993	-1.11398	-0.300406	-0.813574
	0.654993	-1.11394	-0.300381	-0.813556
	0.655993	-1.1139	-0.300357	-0.813539
	0.656993	-1.11385	-0.300333	-0.813522
	0.657993	-1.11381	-0.300309	-0.813504
	0.658993	-1.11377	-0.300286	-0.813487
	0.659993	-1.11373	-0.300263	-0.813469
	0.660993	-1.11369	-0.300241	-0.813452
	0.661993	-1.11365	-0.300219	-0.813435
	0.662993	-1.11361	-0.300197	-0.813417
	0.663993	-1.11358	-0.300177	-0.8134
	0.664993	-1.11354	-0.300156	-0.813383
	0.665993	-1.1135	-0.300136	-0.813365
	0.666993	-1.11346	-0.300117	-0.813348
	0.667993	-1.11343	-0.300098	-0.81333
	0.668993	-1.11339	-0.300079	-0.813313
	0.669993	-1.11336	-0.300062	-0.813296
	0.670993	-1.11332	-0.300044	-0.813278
	0.671993	-1.11329	-0.300028	-0.813261
	0.672993	-1.11325	-0.300011	-0.813244
	0.673993	-1.11322	-0.299996	-0.813226
	0.674993	-1.11319	-0.29998	-0.813209
	0.675993	-1.11316	-0.299965	-0.813191
	0.676993	-1.11312	-0.299951	-0.813174
	0.677993	-1.11309	-0.299937	-0.813157
	0.678993	-1.11306	-0.299923	-0.813139
	0.679993	-1.11303	-0.29991	-0.813122
	0.680993	-1.113	-0.299896	-0.813105
	0.681993	-1.11297	-0.299884	-0.813087
	0.682993	-1.11294	-0.299871	-0.81307
	0.683993	-1.11291	-0.299859	-0.813052
	0.684993	-1.11288	-0.299847	-0.813035
	0.685993	-1.11285	-0.299836	-0.813018
	0.686993	-1.11282	-0.299825	-0.813
	0.687993	-1.1128	-0.299813	-0.812983
	0.688993	-1.11277	-0.299803	-0.812966
	0.689993	-1.11274	-0.299792	-0.812948
	0.690993	-1.11271	-0.299781	-0.812931
	0.691993	-1.11268	-0.299771	-0.812913
	0.692993	-1.11266	-0.299761	-0.812896
	0.693993	-1.11263	-0.29975	-0.812879
	0.694993	-1.1126	-0.29974	-0.812861
	0.695993	-1.11257	-0.29973	-0.812844
	0.696993	-1.11255	-0.29972	-0.812827
	0.697993	-1.11252	-0.29971	-0.812809
	0.698993	-1.11249	-0.299701	-0.812792
	0.699993	-1.11247	-0.299691	-0.812774
	0.700993	-1.11244	-0.299681	-0.812757
	0.701993	-1.11241	-0.299671	-0.81274
	0.702993	-1.11238	-0.299661	-0.812722
	0.703993	-1.11236	-0.299651	-0.812705
	0.704993	-1.11233	-0.299641	-0.812688
	0.705993	-1.1123	-0.299631	-0.81267
	0.706993	-1.11227	-0.29962	-0.812653
	0.707993	-1.11225	-0.29961	-0.812636
	0.708993	-1.11222	-0.299599	-0.812618
	0.709993	-1.11219	-0.299588	-0.812601
	0.710993	-1.11216	-0.299577	-0.812583
	0.711993	-1.11213	-0.299566	-0.812566
	0.712993	-1.1121	-0.299555	-0.812549
	0.713993	-1.11207	-0.299543	-0.812531
	0.714993	-1.11204	-0.299531	-0.812514
	0.715993	-1.11202	-0.299519	-0.812497
	0.716993	-1.11199	-0.299506	-0.812479
	0.717993	-1.11196	-0.299493	-0.812462
	0.718993	-1.11192	-0.29948	-0.812444
	0.719993	-1.11189	-0.299467	-0.812427
	0.720993	-1.11186	-0.299453	-0.81241
	0.721993	-1.11183	-0.299439	-0.812392
	0.722993	-1.1118	-0.299424	-0.812375
	0.723993	-1.11177	-0.299409	-0.812358
	0.724993	-1.11173	-0.299393	-0.81234
	0.725993	-1.1117	-0.299377	-0.812323
	0.726993	-1.11167	-0.299361	-0.812305
	0.727993	-1.11163	-0.299344	-0.812288
	0.728993	-1.1116	-0.299326	-0.812271
	0.729993	-1.11156	-0.299308	-0.812253
	0.730993	-1.11153	-0.29929	-0.812236
	0.731993	-1.11149	-0.29927	-0.812219
	0.732993	-1.11145	-0.299251	-0.812201
	0.733993	-1.11141	-0.299231	-0.812184
	0.734993	-1.11138	-0.29921	-0.812166
	0.735993	-1.11134	-0.299189	-0.812149
	0.736993	-1.1113	-0.299167	-0.812132
	0.737993	-1.11126	-0.299145	-0.812114
	0.738993	-1.11122	-0.299122	-0.812097
	0.739993	-1.11118	-0.299099	-0.81208
	0.740993	-1.11114	-0.299076	-0.812062
	0.741993	-1.1111	-0.299052	-0.812045
	0.742993	-1.11106	-0.299028	-0.812027
	0.743993	-1.11101	-0.299004	-0.81201
	0.744993	-1.11097	-0.298979	-0.811993
	0.745993	-1.11093	-0.298954	-0.811975
	0.746993	-1.11089	-0.298928	-0.811958
	0.747993	-1.11084	-0.298903	-0.811941
	0.748993	-1.1108	-0.298877	-0.811923
	0.749993	-1.11076	-0.29885	-0.811906
	0.750992	-1.11071	-0.298824	-0.811888
	0.751992	-1.11067	-0.298797	-0.811871
	0.752992	-1.11062	-0.29877	-0.811854
	0.753992	-1.11058	-0.298743	-0.811836
	0.754992	-1.11053	-0.298716	-0.811819
	0.755992	-1.11049	-0.298688	-0.811802
	0.756992	-1.11044	-0.29866	-0.811784
	0.757992	-1.1104	-0.298633	-0.811767
	0.758992	-1.11035	-0.298605	-0.811749
	0.759992	-1.11031	-0.298577	-0.811732
	0.760992	-1.11026	-0.298549	-0.811715
	0.761992	-1.11022	-0.29852	-0.811697
	0.762992	-1.11017	-0.298492	-0.81168
	0.763992	-1.11013	-0.298464	-0.811663
	0.764992	-1.11008	-0.298436	-0.811645
	0.765992	-1.11004	-0.298407	-0.811628
	0.766992	-1.10999	-0.298379	-0.81161
	0.767992	-1.10994	-0.298351	-0.811593
	0.768992	-1.1099	-0.298323	-0.811576
	0.769992	-1.10985	-0.298295	-0.811558
	0.770992	-1.10981	-0.298267	-0.811541
	0.771992	-1.10976	-0.298239	-0.811524
	0.772992	-1.10972	-0.298211	-0.811506
	0.773992	-1.10967	-0.298183	-0.811489
	0.774992	-1.10963	-0.298156	-0.811471
	0.775992	-1.10958	-0.298128	-0.811454
	0.776992	-1.10954	-0.298101	-0.811437
	0.777992	-1.10949	-0.298074	-0.811419
	0.778992	-1.10945	-0.298047	-0.811402
	0.779992	-1.1094	-0.29802	-0.811385
	0.780992	-1.10936	-0.297994	-0.811367
	0.781992	-1.10932	-0.297968	-0.81135
	0.782992	-1.10927	-0.297942	-0.811332
	0.783992	-1.10923	-0.297916	-0.811315
	0.784992	-1.10919	-0.297891	-0.811298
	0.785992	-1.10915	-0.297866	-0.81128
	0.786992	-1.1091	-0.297842	-0.811263
	0.787992	-1.10906	-0.297817	-0.811246
	0.788992	-1.10902	-0.297793	-0.811228
	0.789992	-1.10898	-0.29777	-0.811211
	0.790992	-1.10894	-0.297747	-0.811193
	0.791992	-1.1089	-0.297724	-0.811176
	0.792992	-1.10886	-0.297702	-0.811159
	0.793992	-1.10882	-0.29768	-0.811141
	0.794992	-1.10878	-0.297659	-0.811124
	0.795992	-1.10874	-0.297638	-0.811107
	0.796992	-1.10871	-0.297617	-0.811089
	0.797992	-1.10867	-0.297597	-0.811072
	0.798992	-1.10863	-0.297577	-0.811054
	0.799992	-1.10859	-0.297558	-0.811037
	0.800992	-1.10856	-0.297539	-0.81102
	0.801992	-1.10852	-0.29752	-0.811002
	0.802992	-1.10849	-0.297502	-0.810985
	0.803992	-1.10845	-0.297485	-0.810968
	0.804992	-1.10842	-0.297467	-0.81095
	0.805992	-1.10838	-0.29745	-0.810933
	0.806992	-1.10835	-0.297433	-0.810915
	0.807992	-1.10832	-0.297417	-0.810898
	0.808992	-1.10828	-0.297401	-0.810881
	0.809992	-1.10825	-0.297385	-0.810863
	0.810992	-1.10822	-0.29737	-0.810846
	0.811992	-1.10818	-0.297355	-0.810829
	0.812992	-1.10815	-0.29734	-0.810811
	0.813992	-1.10812	-0.297326	-0.810794
	0.814992	-1.10809	-0.297312	-0.810776
	0.815992	-1.10806	-0.297298	-0.810759
	0.816992	-1.10803	-0.297284	-0.810742
	0.817992	-1.108	-0.297271	-0.810724
	0.818992	-1.10797	-0.297258	-0.810707
	0.819992	-1.10793	-0.297245	-0.81069
	0.820992	-1.10791	-0.297233	-0.810672
	0.821992	-1.10788	-0.297221	-0.810655
	0.822992	-1.10785	-0.297209	-0.810637
	0.823992	-1.10782	-0.297197	-0.81062
	0.824992	-1.10779	-0.297185	-0.810603
	0.825992	-1.10776	-0.297174	-0.810585
	0.826992	-1.10773	-0.297163	-0.810568
	0.827992	-1.1077	-0.297152	-0.810551
	0.828992	-1.10767	-0.297141	-0.810533
	0.829992	-1.10765	-0.297131	-0.810516
	0.830992	-1.10762	-0.29712	-0.810498
	0.831992	-1.10759	-0.29711	-0.810481
	0.832992	-1.10756	-0.2971	-0.810464
	0.833992	-1.10754	-0.29709	-0.810446
	0.834992	-1.10751	-0.297081	-0.810429
	0.835992	-1.10748	-0.297071	-0.810412
	0.836992	-1.10746	-0.297062	-0.810394
	0.837992	-1.10743	-0.297052	-0.810377
	0.838992	-1.1074	-0.297043	-0.81036
	0.839992	-1.10738	-0.297034	-0.810342
	0.840992	-1.10735	-0.297025	-0.810325
	0.841992	-1.10732	-0.297016	-0.810307
	0.842992	-1.1073	-0.297008	-0.81029
	0.843992	-1.10727	-0.296999	-0.810273
	0.844992	-1.10725	-0.29699	-0.810255
	0.845992	-1.10722	-0.296982	-0.810238
	0.846992	-1.10719	-0.296974	-0.810221
	0.847992	-1.10717	-0.296965	-0.810203
	0.848992	-1.10714	-0.296957	-0.810186
	0.849992	-1.10712	-0.296949	-0.810168
	0.850991	-1.10709	-0.29694	-0.810151
	0.851991	-1.10707	-0.296932	-0.810134
	0.852991	-1.10704	-0.296924	-0.810116
	0.853991	-1.10701	-0.296916	-0.810099
	0.854991	-1.10699	-0.296908	-0.810082
	0.855991	-1.10696	-0.2969	-0.810064
	0.856991	-1.10694	-0.296892	-0.810047
	0.857991	-1.10691	-0.296883	-0.810029
	0.858991	-1.10689	-0.296875	-0.810012
	0.859991	-1.10686	-0.296867	-0.809995
	0.860991	-1.10684	-0.296859	-0.809977
	0.861991	-1.10681	-0.296851	-0.80996
	0.862991	-1.10678	-0.296842	-0.809943
	0.863991	-1.10676	-0.296834	-0.809925
	0.864991	-1.10673	-0.296825	-0.809908
	0.865991	-1.10671	-0.296817	-0.80989
	0.866991	-1.10668	-0.296808	-0.809873
	0.867991	-1.10666	-0.2968	-0.809856
	0.868991	-1.10663	-0.296791	-0.809838
	0.869991	-1.1066	-0.296782	-0.809821
	0.870991	-1.10658	-0.296773	-0.809804
	0.871991	-1.10655	-0.296764	-0.809786
	0.872991	-1.10652	-0.296755	-0.809769
	0.873991	-1.1065	-0.296746	-0.809751
	0.874991	-1.10647	-0.296736	-0.809734
	0.875991	-1.10644	-0.296727	-0.809717
	0.876991	-1.10642	-0.296717	-0.809699
	0.877991	-1.10639	-0.296707	-0.809682
	0.878991	-1.10636	-0.296697	-0.809665
	0.879991	-1.10633	-0.296687	-0.809647
	0.880991	-1.10631	-0.296677	-0.80963
	0.881991	-1.10628	-0.296666	-0.809612
	0.882991	-1.10625	-0.296655	-0.809595
	0.883991	-1.10622	-0.296644	-0.809578
	0.884991	-1.10619	-0.296633	-0.80956
	0.885991	-1.10616	-0.296622	-0.809543
	0.886991	-1.10614	-0.29661	-0.809526
	0.887991	-1.10611	-0.296598	-0.809508
	0.888991	-1.10608	-0.296586	-0.809491
	0.889991	-1.10605	-0.296574	-0.809473
	0.890991	-1.10602	-0.296562	-0.809456
	0.891991	-1.10599	-0.296549	-0.809439
	0.892991	-1.10596	-0.296536	-0.809421
	0.893991	-1.10593	-0.296522	-0.809404
	0.894991	-1.1059	-0.296509	-0.809387
	0.895991	-1.10586	-0.296495	-0.809369
	0.896991	-1.10583	-0.296481	-0.809352
	0.897991	-1.1058	-0.296466	-0.809334
	0.898991	-1.10577	-0.296452	-0.809317
	0.899991	-1.10574	-0.296436	-0.8093
	0.900991	-1.1057	-0.296421	-0.809282
	0.901991	-1.10567	-0.296405	-0.809265
	0.902991	-1.10564	-0.296389	-0.809248
	0.903991	-1.1056	-0.296373	-0.80923
	0.904991	-1.10557	-0.296356	-0.809213
	0.905991	-1.10553	-0.296339	-0.809195
	0.906991	-1.1055	-0.296322	-0.809178
	0.907991	-1.10546	-0.296304	-0.809161
	0.908991	-1.10543	-0.296286	-0.809143
	0.909991	-1.10539	-0.296267	-0.809126
	0.910991	-1.10536	-0.296248	-0.809109
	0.911991	-1.10532	-0.296229	-0.809091
	0.912991	-1.10528	-0.296209	-0.809074
	0.913991	-1.10525	-0.296189	-0.809056
	0.914991	-1.10521	-0.296168	-0.809039
	0.915991	-1.10517	-0.296147	-0.809022
	0.916991	-1.10513	-0.296126	-0.809004
	0.917991	-1.10509	-0.296104	-0.808987
	0.918991	-1.10505	-0.296081	-0.80897
	0.919991	-1.10501	-0.296059	-0.808952
	0.920991	-1.10497	-0.296035	-0.808935
	0.921991	-1.10493	-0.296012	-0.808917
	0.922991	-1.10489	-0.295988	-0.8089
	0.923991	-1.10485	-0.295963	-0.808883
	0.924991	-1.1048	-0.295939	-0.808865
	0.925991	-1.10476	-0.295914	-0.808848
	0.926991	-1.10472	-0.295888	-0.808831
	0.927991	-1.10468	-0.295863	-0.808813
	0.928991	-1.10463	-0.295837	-0.808796
	0.929991	-1.10459	-0.295811	-0.808778
	0.930991	-1.10455	-0.295784	-0.808761
	0.931991	-1.1045	-0.295758	-0.808744
	0.932991	-1.10446	-0.295731	-0.808726
	0.933991	-1.10441	-0.295704	-0.808709
	0.934991	-1.10437	-0.295676	-0.808692
	0.935991	-1.10432	-0.295649	-0.808674
	0.936991	-1.10428	-0.295621	-0.808657
	0.937991	-1.10423	-0.295593	-0.808639
	0.938991	-1.10419	-0.295566	-0.808622
	0.939991	-1.10414	-0.295538	-0.808605
	0.940991	-1.1041	-0.29551	-0.808587
	0.941991	-1.10405	-0.295481	-0.80857
	0.942991	-1.10401	-0.295453	-0.808553
	0.943991	-1.10396	-0.295425	-0.808535
	0.944991	-1.10391	-0.295397	-0.808518
	0.945991	-1.10387	-0.295368	-0.8085
	0.946991	-1.10382	-0.29534	-0.808483
	0.947991	-1.10378	-0.295312	-0.808466
	0.948991	-1.10373	-0.295284	-0.808448
	0.949991	-1.10369	-0.295256	-0.808431
	0.95099	-1.10364	-0.295227	-0.808414
	0.95199	-1.1036	-0.295199	-0.808396
	0.95299	-1.10355	-0.295172	-0.808379
	0.95399	-1.10351	-0.295144	-0.808361
	0.95499	-1.10346	-0.295116	-0.808344
	0.95599	-1.10342	-0.295089	-0.808327
	0.95699	-1.10337	-0.295061	-0.808309
	0.95799	-1.10333	-0.295034	-0.808292
	0.95899	-1.10328	-0.295007	-0.808275
	0.95999	-1.10324	-0.294981	-0.808257
	0.96099	-1.10319	-0.294954	-0.80824
	0.96199	-1.10315	-0.294928	-0.808222
	0.96299	-1.10311	-0.294902	-0.808205
	0.96399	-1.10306	-0.294876	-0.808188
	0.96499	-1.10302	-0.294851	-0.80817
	0.96599	-1.10298	-0.294826	-0.808153
	0.96699	-1.10294	-0.294801	-0.808136
	0.96799	-1.10289	-0.294776	-0.808118
	0.96899	-1.10285	-0.294752	-0.808101
	0.96999	-1.10281	-0.294729	-0.808084
	0.97099	-1.10277	-0.294705	-0.808066
	0.97199	-1.10273	-0.294683	-0.808049
	0.97299	-1.10269	-0.29466	-0.808031
	0.97399	-1.10265	-0.294638	-0.808014
	0.97499	-1.10261	-0.294617	-0.807997
	0.97599	-1.10257	-0.294596	-0.807979
	0.97699	-1.10254	-0.294575	-0.807962
	0.97799	-1.1025	-0.294555	-0.807945
	0.97899	-1.10246	-0.294535	-0.807927
	0.97999	-1.10243	-0.294516	-0.80791
	0.98099	-1.10239	-0.294498	-0.807892
	0.98199	-1.10236	-0.29448	-0.807875
	0.98299	-1.10232	-0.294463	-0.807858
	0.98399	-1.10229	-0.294446	-0.80784
	0.98499	-1.10225	-0.294429	-0.807823
	0.98599	-1.10222	-0.294413	-0.807806
	0.98699	-1.10219	-0.294398	-0.807788
	0.98799	-1.10215	-0.294383	-0.807771
	0.98899	-1.10212	-0.294368	-0.807753
	0.98999	-1.10209	-0.294354	-0.807736
	0.99099	-1.10206	-0.29434	-0.807719
	0.99199	-1.10203	-0.294327	-0.807701
	0.99299	-1.102	-0.294314	-0.807684
	0.99399	-1.10197	-0.294301	-0.807667
	0.99499	-1.10194	-0.294289	-0.807649
	0.99599	-1.10191	-0.294277	-0.807632
	0.99699	-1.10188	-0.294265	-0.807614
	0.99799	-1.10185	-0.294253	-0.807597
	0.99899	-1.10182	-0.294242	-0.80758
	0.99999	-1.10179	-0.294231	-0.807562
	1.00099	-1.10176	-0.29422	-0.807545
	1.00199	-1.10174	-0.294209	-0.807528
	1.00299	-1.10171	-0.294199	-0.80751
	1.00399	-1.10168	-0.294188	-0.807493
	1.00499	-1.10165	-0.294178	-0.807475
	1.00599	-1.10163	-0.294168	-0.807458
	1.00699	-1.1016	-0.294158	-0.807441
	1.00799	-1.10157	-0.294148	-0.807423
	1.00899	-1.10154	-0.294138	-0.807406
	1.00999	-1.10152	-0.294128	-0.807389
	1.01099	-1.10149	-0.294118	-0.807371
	1.01199	-1.10146	-0.294108	-0.807354
	1.01299	-1.10143	-0.294098	-0.807336
	1.01399	-1.10141	-0.294088	-0.807319
	1.01499	-1.10138	-0.294079	-0.807302
	1.01599	-1.10135	-0.294069	-0.807284
	1.01699	-1.10133	-0.294058	-0.807267
	1.01799	-1.1013	-0.294048	-0.80725
	1.01899	-1.10127	-0.294038	-0.807232
	1.01999	-1.10124	-0.294028	-0.807215
	1.02099	-1.10121	-0.294017	-0.807197
	1.02199	-1.10119	-0.294006	-0.80718
	1.02299	-1.10116	-0.293995	-0.807163
	1.02399	-1.10113	-0.293984	-0.807145
	1.02499	-1.1011	-0.293973	-0.807128
	1.02599	-1.10107	-0.293961	-0.807111
	1.02699	-1.10104	-0.293949	-0.807093
	1.02799	-1.10101	-0.293937	-0.807076
	1.02899	-1.10098	-0.293924	-0.807058
	1.02999	-1.10095	-0.293912	-0.807041
	1.03099	-1.10092	-0.293898	-0.807024
	1.03199	-1.10089	-0.293885	-0.807006
	1.03299	-1.10086	-0.293871	-0.806989
	1.03399	-1.10083	-0.293857	-0.806972
	1.03499	-1.1008	-0.293842	-0.806954
	1.03599	-1.10076	-0.293827	-0.806937
	1.03699	-1.10073	-0.293812	-0.806919
	1.03799	-1.1007	-0.293796	-0.806902
	1.03899	-1.10066	-0.293779	-0.806885
	1.03999	-1.10063	-0.293762	-0.806867
	1.04099	-1.10059	-0.293745	-0.80685
	1.04199	-1.10056	-0.293727	-0.806833
	1.04299	-1.10052	-0.293708	-0.806815
	1.04399	-1.10049	-0.293689	-0.806798
	1.04499	-1.10045	-0.293669	-0.80678
	1.04599	-1.10041	-0.293649	-0.806763
	1.04699	-1.10037	-0.293628	-0.806746
	1.04799	-1.10034	-0.293607	-0.806728
	1.04899	-1.1003	-0.293585	-0.806711
	1.04999	-1.10026	-0.293563	-0.806694
	1.05099	-1.10022	-0.293541	-0.806676
	1.05199	-1.10018	-0.293518	-0.806659
	1.05299	-1.10014	-0.293494	-0.806641
	1.05399	-1.10009	-0.29347	-0.806624
	1.05499	-1.10005	-0.293446	-0.806607
	1.05599	-1.10001	-0.293422	-0.806589
	1.05699	-1.09997	-0.293397	-0.806572
	1.05799	-1.09993	-0.293371	-0.806555
	1.05899	-1.09988	-0.293346	-0.806537
	1.05999	-1.09984	-0.29332	-0.80652
	1.06099	-1.0998	-0.293294	-0.806502
	1.06199	-1.09975	-0.293267	-0.806485
	1.06299	-1.09971	-0.293241	-0.806468
	1.06399	-1.09966	-0.293214	-0.80645
	1.06499	-1.09962	-0.293187	-0.806433
	1.06599	-1.09958	-0.29316	-0.806416
	1.06699	-1.09953	-0.293132	-0.806398
	1.06799	-1.09949	-0.293104	-0.806381
	1.06899	-1.09944	-0.293077	-0.806363
	1.06999	-1.09939	-0.293049	-0.806346
	1.07099	-1.09935	-0.293021	-0.806329
	1.07199	-1.0993	-0.292993	-0.806311
	1.07299	-1.09926	-0.292964	-0.806294
	1.07399	-1.09921	-0.292936	-0.806277
	1.07499	-1.09917	-0.292908	-0.806259
	1.07599	-1.09912	-0.29288	-0.806242
	1.07699	-1.09908	-0.292851	-0.806224
	1.07799	-1.09903	-0.292823	-0.806207
	1.07899	-1.09898	-0.292795	-0.80619
	1.07999	-1.09894	-0.292766	-0.806172
	1.08099	-1.09889	-0.292738	-0.806155
	1.08199	-1.09885	-0.29271	-0.806138
	1.08299	-1.0988	-0.292682	-0.80612
	1.08399	-1.09876	-0.292654	-0.806103
	1.08499	-1.09871	-0.292626	-0.806085
	1.08599	-1.09867	-0.292598	-0.806068
	1.08699	-1.09862	-0.292571	-0.806051
	1.08799	-1.09858	-0.292544	-0.806033
	1.08899	-1.09853	-0.292516	-0.806016
	1.08999	-1.09849	-0.292489	-0.805999
	1.09099	-1.09844	-0.292463	-0.805981
	1.09199	-1.0984	-0.292436	-0.805964
	1.09299	-1.09836	-0.29241	-0.805946
	1.09399	-1.09831	-0.292384	-0.805929
	1.09499	-1.09827	-0.292358	-0.805912
	1.09599	-1.09823	-0.292333	-0.805894
	1.09699	-1.09818	-0.292308	-0.805877
	1.09799	-1.09814	-0.292283	-0.80586
	1.09899	-1.0981	-0.292259	-0.805842
	1.09999	-1.09806	-0.292235	-0.805825
	1.10099	-1.09802	-0.292211	-0.805808
	1.10199	-1.09798	-0.292188	-0.80579
	1.10299	-1.09794	-0.292165	-0.805773
	1.10399	-1.0979	-0.292143	-0.805755
	1.10499	-1.09786	-0.292121	-0.805738
	1.10599	-1.09782	-0.2921	-0.805721
	1.10699	-1.09778	-0.292079	-0.805703
	1.10799	-1.09774	-0.292058	-0.805686
	1.10899	-1.09771	-0.292038	-0.805669
	1.10999	-1.09767	-0.292019	-0.805651
	1.11099	-1.09763	-0.292	-0.805634
	1.11199	-1.0976	-0.291981	-0.805616
	1.11299	-1.09756	-0.291963	-0.805599
	1.11399	-1.09753	-0.291945	-0.805582
	1.11499	-1.09749	-0.291927	-0.805564
	1.11599	-1.09746	-0.29191	-0.805547
	1.11699	-1.09742	-0.291893	-0.80553
	1.11799	-1.09739	-0.291877	-0.805512
	1.11899	-1.09736	-0.291861	-0.805495
	1.11999	-1.09732	-0.291845	-0.805477
	1.12099	-1.09729	-0.29183	-0.80546
	1.12199	-1.09726	-0.291815	-0.805443
	1.12299	-1.09723	-0.2918	-0.805425
	1.12399	-1.09719	-0.291786	-0.805408
	1.12499	-1.09716	-0.291772	-0.805391
	1.12599	-1.09713	-0.291758	-0.805373
	1.12699	-1.0971	-0.291745	-0.805356
	1.12799	-1.09707	-0.291731	-0.805338
	1.12899	-1.09704	-0.291718	-0.805321
	1.12999	-1.09701	-0.291706	-0.805304
	1.13099	-1.09698	-0.291693	-0.805286
	1.13199	-1.09695	-0.291681	-0.805269
	1.13299	-1.09692	-0.291669	-0.805252
	1.13399	-1.09689	-0.291657	-0.805234
	1.13499	-1.09686	-0.291646	-0.805217
	1.13599	-1.09683	-0.291634	-0.805199
	1.13699	-1.0968	-0.291623	-0.805182
	1.13799	-1.09678	-0.291612	-0.805165
	1.13899	-1.09675	-0.291601	-0.805147
	1.13999	-1.09672	-0.29159	-0.80513
	1.14099	-1.09669	-0.29158	-0.805113
	1.14199	-1.09666	-0.291569	-0.805095
	1.14299	-1.09664	-0.291559	-0.805078
	1.14399	-1.09661	-0.291549	-0.80506
	1.14499	-1.09658	-0.291539	-0.805043
	1.14599	-1.09655	-0.291529	-0.805026
	1.14699	-1.09653	-0.291519	-0.805008
	1.14799	-1.0965	-0.291509	-0.804991
	1.14899	-1.09647	-0.291499	-0.804974
	1.14999	-1.09645	-0.291489	-0.804956
	1.15099	-1.09642	-0.29148	-0.804939
	1.15199	-1.09639	-0.29147	-0.804921
	1.15299	-1.09636	-0.291461	-0.804904
	1.15399	-1.09634	-0.291451	-0.804887
	1.15499	-1.09631	-0.291442	-0.804869
	1.15599	-1.09628	-0.291432	-0.804852
	1.15699	-1.09626	-0.291422	-0.804835
	1.15799	-1.09623	-0.291413	-0.804817
	1.15899	-1.0962	-0.291403	-0.8048
	1.15999	-1.09618	-0.291394	-0.804782
	1.16099	-1.09615	-0.291384	-0.804765
	1.16199	-1.09612	-0.291374	-0.804748
	1.16299	-1.09609	-0.291365	-0.80473
	1.16399	-1.09607	-0.291355	-0.804713
	1.16499	-1.09604	-0.291345	-0.804696
	1.16599	-1.09601	-0.291335	-0.804678
	1.16699	-1.09599	-0.291325	-0.804661
	1.16799	-1.09596	-0.291315	-0.804643
	1.16899	-1.09593	-0.291304	-0.804626
	1.16999	-1.0959	-0.291294	-0.804609
	1.17099	-1.09587	-0.291283	-0.804591
	1.17199	-1.09585	-0.291273	-0.804574
	1.17299	-1.09582	-0.291262	-0.804557
	1.17399	-1.09579	-0.291251	-0.804539
	1.17499	-1.09576	-0.29124	-0.804522
	1.17599	-1.09573	-0.291229	-0.804504
	1.17699	-1.0957	-0.291218	-0.804487
	1.17799	-1.09568	-0.291206	-0.80447
	1.17899	-1.09565	-0.291195	-0.804452
	1.17999	-1.09562	-0.291183	-0.804435
	1.18099	-1.09559	-0.291172	-0.804418
	1.18199	-1.09556	-0.29116	-0.8044
	1.18299	-1.09553	-0.291148	-0.804383
	1.18399	-1.0955	-0.291136	-0.804365
	1.18499	-1.09547	-0.291124	-0.804348
	1.18599	-1.09544	-0.291112	-0.804331
	1.18699	-1.09541	-0.2911	-0.804313
	1.18799	-1.09538	-0.291088	-0.804296
	1.18899	-1.09535	-0.291076	-0.804279
	1.18999	-1.09532	-0.291063	-0.804261
	1.19099	-1.09529	-0.291051	-0.804244
	1.19199	-1.09526	-0.291038	-0.804226
	1.19299	-1.09523	-0.291026	-0.804209
	1.19399	-1.0952	-0.291013	-0.804192
	1.19499	-1.09517	-0.291	-0.804174
	1.19599	-1.09514	-0.290987	-0.804157
	1.19699	-1.09511	-0.290974	-0.80414
	1.19799	-1.09508	-0.290961	-0.804122
	1.19899	-1.09505	-0.290948	-0.804105
	1.19999	-1.09502	-0.290935	-0.804087
	1.20099	-1.09499	-0.290922	-0.80407
	1.20199	-1.09496	-0.290909	-0.804053
	1.20299	-1.09493	-0.290896	-0.804035
	1.20399	-1.0949	-0.290882	-0.804018
	1.20499	-1.09487	-0.290869	-0.804001
	1.20599	-1.09484	-0.290856	-0.803983
	1.20699	-1.09481	-0.290842	-0.803966
	1.20799	-1.09478	-0.290829	-0.803948
	1.20899	-1.09475	-0.290815	-0.803931
	1.20999	-1.09472	-0.290801	-0.803914
	1.21099	-1.09468	-0.290788	-0.803896
	1.21199	-1.09465	-0.290774	-0.803879
	1.21299	-1.09462	-0.29076	-0.803862
	1.21399	-1.09459	-0.290746	-0.803844
	1.21499	-1.09456	-0.290733	-0.803827
	1.21599	-1.09453	-0.290719	-0.803809
	1.21699	-1.0945	-0.290705	-0.803792
	1.21799	-1.09447	-0.290691	-0.803775
	1.21899	-1.09443	-0.290677	-0.803757
	1.21999	-1.0944	-0.290663	-0.80374
	1.22099	-1.09437	-0.290649	-0.803723
	1.22199	-1.09434	-0.290635	-0.803705
	1.22299	-1.09431	-0.290621	-0.803688
	1.22399	-1.09428	-0.290607	-0.803671
	1.22499	-1.09425	-0.290593	-0.803653
	1.22599	-1.09421	-0.290578	-0.803636
	1.22699	-1.09418	-0.290564	-0.803618
	1.22799	-1.09415	-0.29055	-0.803601
	1.22899	-1.09412	-0.290536	-0.803584
	1.22999	-1.09409	-0.290522	-0.803566
	1.23099	-1.09406	-0.290508	-0.803549
	1.23199	-1.09402	-0.290493	-0.803532
	1.23299	-1.09399	-0.290479	-0.803514
	1.23399	-1.09396	-0.290465	-0.803497
	1.23499	-1.09393	-0.290451	-0.803479
	1.23599	-1.0939	-0.290437	-0.803462
	1.23699	-1.09387	-0.290422	-0.803445
	1.23799	-1.09384	-0.290408	-0.803427
	1.23899	-1.0938	-0.290394	-0.80341
	1.23999	-1.09377	-0.29038	-0.803393
	1.24099	-1.09374	-0.290366	-0.803375
	1.24199	-1.09371	-0.290352	-0.803358
	1.24299	-1.09368	-0.290338	-0.80334
	1.24399	-1.09365	-0.290324	-0.803323
	1.24499	-1.09362	-0.29031	-0.803306
	1.24599	-1.09358	-0.290296	-0.803288
	1.24699	-1.09355	-0.290282	-0.803271
	1.24799	-1.09352	-0.290268	-0.803254
	1.24899	-1.09349	-0.290254	-0.803236
	1.24999	-1.09346	-0.29024	-0.803219
	1.25099	-1.09343	-0.290226	-0.803201
	1.25199	-1.0934	-0.290212	-0.803184
	1.25299	-1.09337	-0.290198	-0.803167
	1.25399	-1.09333	-0.290185	-0.803149
	1.25499	-1.0933	-0.290171	-0.803132
	1.25599	-1.09327	-0.290158	-0.803115
	1.25699	-1.09324	-0.290144	-0.803097
	1.25799	-1.09321	-0.290131	-0.80308
	1.25899	-1.09318	-0.290117	-0.803062
	1.25999	-1.09315	-0.290104	-0.803045
	1.26099	-1.09312	-0.290091	-0.803028
	1.26199	-1.09309	-0.290077	-0.80301
	1.26299	-1.09306	-0.290064	-0.802993
	1.26399	-1.09303	-0.290051	-0.802976
	1.26499	-1.093	-0.290038	-0.802958
	1.26599	-1.09297	-0.290025	-0.802941
	1.26699	-1.09294	-0.290013	-0.802923
	1.26799	-1.09291	-0.29	-0.802906
	1.26899	-1.09288	-0.289987	-0.802889
	1.26999	-1.09285	-0.289975	-0.802871
	1.27099	-1.09282	-0.289962	-0.802854
	1.27199	-1.09279	-0.28995	-0.802837
	1.27299	-1.09276	-0.289938	-0.802819
	1.27399	-1.09273	-0.289926	-0.802802
	1.27499	-1.0927	-0.289914	-0.802784
	1.27599	-1.09267	-0.289902	-0.802767
	1.27699	-1.09264	-0.28989	-0.80275
	1.27799	-1.09261	-0.289878	-0.802732
	1.27899	-1.09258	-0.289866	-0.802715
	1.27999	-1.09255	-0.289855	-0.802698
	1.28099	-1.09252	-0.289844	-0.80268
	1.28199	-1.0925	-0.289832	-0.802663
	1.28299	-1.09247	-0.289821	-0.802645
	1.28399	-1.09244	-0.28981	-0.802628
	1.28499	-1.09241	-0.289799	-0.802611
	1.28599	-1.09238	-0.289789	-0.802593
	1.28699	-1.09235	-0.289778	-0.802576
	1.28799	-1.09233	-0.289768	-0.802559
	1.28899	-1.0923	-0.289757	-0.802541
	1.28999	-1.09227	-0.289747	-0.802524
	1.29099	-1.09224	-0.289737	-0.802506
	1.29199	-1.09222	-0.289727	-0.802489
	1.29299	-1.09219	-0.289718	-0.802472
	1.29399	-1.09216	-0.289708	-0.802454
	1.29499	-1.09214	-0.289699	-0.802437
	1.29599	-1.09211	-0.289689	-0.80242
	1.29699	-1.09208	-0.28968	-0.802402
	1.29799	-1.09206	-0.289671	-0.802385
	1.29899	-1.09203	-0.289662	-0.802367
	1.29999	-1.092	-0.289653	-0.80235
	1.30099	-1.09198	-0.289644	-0.802333
	1.30199	-1.09195	-0.289635	-0.802315
	1.30299	-1.09192	-0.289627	-0.802298
	1.30399	-1.0919	-0.289618	-0.802281
	1.30499	-1.09187	-0.289609	-0.802263
	1.30599	-1.09185	-0.2896	-0.802246
	1.30699	-1.09182	-0.289592	-0.802228
	1.30799	-1.09179	-0.289583	-0.802211
	1.30899	-1.09177	-0.289574	-0.802194
	1.30999	-1.09174	-0.289565	-0.802176
	1.31099	-1.09172	-0.289556	-0.802159
	1.31199	-1.09169	-0.289548	-0.802142
	1.31299	-1.09166	-0.289538	-0.802124
	1.31399	-1.09164	-0.289529	-0.802107
	1.31499	-1.09161	-0.28952	-0.802089
	1.31599	-1.09158	-0.289511	-0.802072
	1.31699	-1.09156	-0.289501	-0.802055
	1.31799	-1.09153	-0.289492	-0.802037
	1.31899	-1.0915	-0.289482	-0.80202
	1.31999	-1.09147	-0.289472	-0.802003
	1.32099	-1.09145	-0.289462	-0.801985
	1.32199	-1.09142	-0.289451	-0.801968
	1.32299	-1.09139	-0.289441	-0.80195
	1.32399	-1.09136	-0.28943	-0.801933
	1.32499	-1.09133	-0.289419	-0.801916
	1.32599	-1.09131	-0.289408	-0.801898
	1.32699	-1.09128	-0.289397	-0.801881
	1.32799	-1.09125	-0.289385	-0.801864
	1.32899	-1.09122	-0.289373	-0.801846
	1.32999	-1.09119	-0.289361	-0.801829
	1.33099	-1.09116	-0.289348	-0.801811
	1.33199	-1.09113	-0.289335	-0.801794
	1.33299	-1.0911	-0.289322	-0.801777
	1.33399	-1.09107	-0.289308	-0.801759
	1.33499	-1.09104	-0.289295	-0.801742
	1.33599	-1.091	-0.28928	-0.801725
	1.33699	-1.09097	-0.289266	-0.801707
	1.33799	-1.09094	-0.289251	-0.80169
	1.33899	-1.09091	-0.289235	-0.801672
	1.33999	-1.09087	-0.289219	-0.801655
	1.34099	-1.09084	-0.289203	-0.801638
	1.34199	-1.09081	-0.289187	-0.80162
	1.34299	-1.09077	-0.289169	-0.801603
	1.34399	-1.09074	-0.289152	-0.801586
	1.34499	-1.0907	-0.289134	-0.801568
	1.34599	-1.09067	-0.289115	-0.801551
	1.34699	-1.09063	-0.289096	-0.801533
	1.34799	-1.09059	-0.289077	-0.801516
	1.34899	-1.09056	-0.289057	-0.801499
	1.34999	-1.09052	-0.289036	-0.801481
	1.35099	-1.09048	-0.289015	-0.801464
	1.35199	-1.09044	-0.288994	-0.801447
	1.35299	-1.0904	-0.288971	-0.801429
	1.35399	-1.09036	-0.288949	-0.801412
	1.35499	-1.09032	-0.288925	-0.801395
	1.35599	-1.09028	-0.288901	-0.801377
	1.35699	-1.09024	-0.288877	-0.80136
	1.35799	-1.09019	-0.288852	-0.801342
	1.35899	-1.09015	-0.288826	-0.801325
	1.35999	-1.09011	-0.2888	-0.801308
	1.36099	-1.09006	-0.288773	-0.80129
	1.36199	-1.09002	-0.288746	-0.801273
	1.36299	-1.08997	-0.288719	-0.801256
	1.36399	-1.08993	-0.288691	-0.801238
	1.36499	-1.08988	-0.288663	-0.801221
	1.36599	-1.08984	-0.288634	-0.801203
	1.36699	-1.08979	-0.288605	-0.801186
	1.36799	-1.08974	-0.288576	-0.801169
	1.36899	-1.0897	-0.288547	-0.801151
	1.36999	-1.08965	-0.288517	-0.801134
	1.37099	-1.0896	-0.288487	-0.801117
	1.37199	-1.08956	-0.288457	-0.801099
	1.37299	-1.08951	-0.288427	-0.801082
	1.37399	-1.08946	-0.288397	-0.801064
	1.37499	-1.08941	-0.288366	-0.801047
	1.37599	-1.08937	-0.288335	-0.80103
	1.37699	-1.08932	-0.288305	-0.801012
	1.37799	-1.08927	-0.288274	-0.800995
	1.37899	-1.08922	-0.288244	-0.800978
	1.37999	-1.08917	-0.288213	-0.80096
	1.38099	-1.08913	-0.288182	-0.800943
	1.38199	-1.08908	-0.288152	-0.800925
	1.38299	-1.08903	-0.288121	-0.800908
	1.38399	-1.08898	-0.288091	-0.800891
	1.38499	-1.08893	-0.288061	-0.800873
	1.38599	-1.08889	-0.288031	-0.800856
	1.38699	-1.08884	-0.288001	-0.800839
	1.38799	-1.08879	-0.287972	-0.800821
	1.38899	-1.08875	-0.287942	-0.800804
	1.38999	-1.0887	-0.287913	-0.800786
	1.39099	-1.08865	-0.287885	-0.800769
	1.39199	-1.08861	-0.287856	-0.800752
	1.39299	-1.08856	-0.287828	-0.800734
	1.39399	-1.08852	-0.287801	-0.800717
	1.39499	-1.08847	-0.287774	-0.8007
	1.39599	-1.08843	-0.287747	-0.800682
	1.39699	-1.08839	-0.287721	-0.800665
	1.39799	-1.08834	-0.287695	-0.800647
	1.39899	-1.0883	-0.28767	-0.80063
	1.39999	-1.08826	-0.287645	-0.800613
	1.40099	-1.08822	-0.287621	-0.800595
	1.40199	-1.08818	-0.287597	-0.800578
	1.40299	-1.08813	-0.287574	-0.800561
	1.40399	-1.0881	-0.287552	-0.800543
	1.40499	-1.08806	-0.28753	-0.800526
	1.40599	-1.08802	-0.287509	-0.800508
	1.40699	-1.08798	-0.287489	-0.800491
	1.40799	-1.08794	-0.28747	-0.800474
	1.40899	-1.08791	-0.287451	-0.800456
	1.40999	-1.08787	-0.287433	-0.800439
	1.41099	-1.08784	-0.287416	-0.800422
	1.41199	-1.0878	-0.2874	-0.800404
	1.41299	-1.08777	-0.287385	-0.800387
	1.41399	-1.08774	-0.28737	-0.800369
	1.41499	-1.08771	-0.287357	-0.800352
	1.41599	-1.08768	-0.287344	-0.800335
	1.41699	-1.08765	-0.287333	-0.800317
	1.41799	-1.08762	-0.287322	-0.8003
	1.41899	-1.0876	-0.287313	-0.800283
	1.41999	-1.08757	-0.287304	-0.800265
	1.42099	-1.08754	-0.287297	-0.800248
	1.42199	-1.08752	-0.28729	-0.80023
	1.42299	-1.0875	-0.287284	-0.800213
	1.42399	-1.08748	-0.287279	-0.800196
	1.42499	-1.08745	-0.287275	-0.800178
	1.42599	-1.08743	-0.287272	-0.800161
	1.42699	-1.08741	-0.287269	-0.800144
	1.42799	-1.08739	-0.287267	-0.800126
	1.42899	-1.08738	-0.287266	-0.800109
	1.42999	-1.08736	-0.287266	-0.800091
	1.43099	-1.08734	-0.287266	-0.800074
	1.43199	-1.08732	-0.287266	-0.800057
	1.43299	-1.08731	-0.287268	-0.800039
	1.43399	-1.08729	-0.287269	-0.800022
	1.43499	-1.08728	-0.287272	-0.800005
	1.43599	-1.08726	-0.287274	-0.799987
	1.43699	-1.08725	-0.287277	-0.79997
	1.43799	-1.08723	-0.287281	-0.799952
	1.43899	-1.08722	-0.287284	-0.799935
	1.43999	-1.08721	-0.287288	-0.799918
	1.44099	-1.08719	-0.287293	-0.7999
	1.44199	-1.08718	-0.287297	-0.799883
	1.44299	-1.08717	-0.287302	-0.799866
	1.44399	-1.08716	-0.287307	-0.799848
	1.44499	-1.08714	-0.287312	-0.799831
	1.44599	-1.08713	-0.287318	-0.799813
	1.44699	-1.08712	-0.287323	-0.799796
	1.44799	-1.08711	-0.287328	-0.799779
	1.44899	-1.0871	-0.287334	-0.799761
	1.44999	-1.08708	-0.287339	-0.799744
	1.45099	-1.08707	-0.287345	-0.799727
	1.45199	-1.08706	-0.28735	-0.799709
	1.45299	-1.08705	-0.287355	-0.799692
	1.45399	-1.08703	-0.28736	-0.799674
	1.45499	-1.08702	-0.287365	-0.799657
	1.45599	-1.08701	-0.287369	-0.79964
	1.45699	-1.087	-0.287374	-0.799622
	1.45799	-1.08698	-0.287378	-0.799605
	1.45899	-1.08697	-0.287381	-0.799588
	1.45999	-1.08695	-0.287385	-0.79957
	1.46099	-1.08694	-0.287388	-0.799553
	1.46199	-1.08693	-0.28739	-0.799535
	1.46299	-1.08691	-0.287392	-0.799518
	1.46399	-1.08689	-0.287394	-0.799501
	1.46499	-1.08688	-0.287395	-0.799483
	1.46599	-1.08686	-0.287396	-0.799466
	1.46699	-1.08684	-0.287396	-0.799449
	1.46799	-1.08683	-0.287395	-0.799431
	1.46899	-1.08681	-0.287394	-0.799414
	1.46999	-1.08679	-0.287392	-0.799396
	1.47099	-1.08677	-0.287389	-0.799379
	1.47199	-1.08675	-0.287386	-0.799362
	1.47299	-1.08673	-0.287381	-0.799344
	1.47399	-1.0867	-0.287376	-0.799327
	1.47499	-1.08668	-0.28737	-0.79931
	1.47599	-1.08666	-0.287364	-0.799292
	1.47699	-1.08663	-0.287356	-0.799275
	1.47799	-1.0866	-0.287347	-0.799257
	1.47899	-1.08658	-0.287338	-0.79924
	1.47999	-1.08655	-0.287327	-0.799223
	1.48099	-1.08652	-0.287315	-0.799205
	1.48199	-1.08649	-0.287303	-0.799188
	1.48299	-1.08646	-0.287289	-0.799171
	1.48399	-1.08643	-0.287274	-0.799153
	1.48499	-1.08639	-0.287259	-0.799136
	1.48599	-1.08636	-0.287242	-0.799119
	1.48699	-1.08633	-0.287225	-0.799101
	1.48799	-1.08629	-0.287206	-0.799084
	1.48899	-1.08625	-0.287187	-0.799066
	1.48999	-1.08622	-0.287167	-0.799049
	1.49099	-1.08618	-0.287147	-0.799032
	1.49199	-1.08614	-0.287125	-0.799014
	1.49299	-1.0861	-0.287103	-0.798997
	1.49399	-1.08606	-0.28708	-0.79898
	1.49499	-1.08602	-0.287057	-0.798962
	1.49599	-1.08598	-0.287033	-0.798945
	1.49699	-1.08594	-0.287008	-0.798927
	1.49799	-1.08589	-0.286983	-0.79891
	1.49899	-1.08585	-0.286957	-0.798893
	1.49999	-1.08581	-0.286931	-0.798875
	1.50098	-1.08576	-0.286904	-0.798858
	1.50198	-1.08572	-0.286877	-0.798841
	1.50298	-1.08567	-0.286849	-0.798823
	1.50398	-1.08563	-0.286821	-0.798806
	1.50498	-1.08558	-0.286793	-0.798788
	1.50598	-1.08554	-0.286764	-0.798771
	1.50698	-1.08549	-0.286735	-0.798754
	1.50798	-1.08544	-0.286706	-0.798736
	1.50898	-1.08539	-0.286676	-0.798719
	1.50998	-1.08535	-0.286646	-0.798702
	1.51098	-1.0853	-0.286616	-0.798684
	1.51198	-1.08525	-0.286586	-0.798667
	1.51298	-1.08521	-0.286556	-0.798649
	1.51398	-1.08516	-0.286525	-0.798632
	1.51498	-1.08511	-0.286495	-0.798615
	1.51598	-1.08506	-0.286464	-0.798597
	1.51698	-1.08501	-0.286433	-0.79858
	1.51798	-1.08497	-0.286403	-0.798563
	1.51898	-1.08492	-0.286372	-0.798545
	1.51998	-1.08487	-0.286342	-0.798528
	1.52098	-1.08482	-0.286311	-0.79851
	1.52198	-1.08477	-0.286281	-0.798493
	1.52298	-1.08473	-0.28625	-0.798476
	1.52398	-1.08468	-0.28622	-0.798458
	1.52498	-1.08463	-0.286191	-0.798441
	1.52598	-1.08458	-0.286161	-0.798424
	1.52698	-1.08454	-0.286132	-0.798406
	1.52798	-1.08449	-0.286102	-0.798389
	1.52898	-1.08445	-0.286074	-0.798371
	1.52998	-1.0844	-0.286045	-0.798354
	1.53098	-1.08435	-0.286017	-0.798337
	1.53198	-1.08431	-0.285989	-0.798319
	1.53298	-1.08426	-0.285962	-0.798302
	1.53398	-1.08422	-0.285935	-0.798285
	1.53498	-1.08418	-0.285909	-0.798267
	1.53598	-1.08413	-0.285883	-0.79825
	1.53698	-1.08409	-0.285858	-0.798232
	1.53798	-1.08405	-0.285833	-0.798215
	1.53898	-1.08401	-0.285809	-0.798198
	1.53998	-1.08397	-0.285786	-0.79818
	1.54098	-1.08393	-0.285763	-0.798163
	1.54198	-1.08389	-0.285741	-0.798146
	1.54298	-1.08385	-0.285719	-0.798128
	1.54398	-1.08381	-0.285699	-0.798111
	1.54498	-1.08377	-0.285679	-0.798093
	1.54598	-1.08374	-0.285659	-0.798076
	1.54698	-1.0837	-0.28564	-0.798059
	1.54798	-1.08366	-0.285622	-0.798041
	1.54898	-1.08363	-0.285605	-0.798024
	1.54998	-1.08359	-0.285588	-0.798007
	1.55098	-1.08356	-0.285572	-0.797989
	1.55198	-1.08353	-0.285556	-0.797972
	1.55298	-1.08349	-0.28554	-0.797954
	1.55398	-1.08346	-0.285526	-0.797937
	1.55498	-1.08343	-0.285511	-0.79792
	1.55598	-1.0834	-0.285497	-0.797902
	1.55698	-1.08337	-0.285484	-0.797885
	1.55798	-1.08334	-0.285471	-0.797868
	1.55898	-1.08331	-0.285458	-0.79785
	1.55998	-1.08328	-0.285446	-0.797833
	1.56098	-1.08325	-0.285434	-0.797815
	1.56198	-1.08322	-0.285423	-0.797798
	1.56298	-1.08319	-0.285411	-0.797781
	1.56398	-1.08316	-0.2854	-0.797763
	1.56498	-1.08314	-0.28539	-0.797746
	1.56598	-1.08311	-0.285379	-0.797729
	1.56698	-1.08308	-0.285369	-0.797711
	1.56798	-1.08305	-0.285359	-0.797694
	1.56898	-1.08303	-0.285349	-0.797676
	1.56998	-1.083	-0.285339	-0.797659
	1.57098	-1.08297	-0.28533	-0.797642
	1.57198	-1.08294	-0.28532	-0.797624
	1.57298	-1.08292	-0.285311	-0.797607
	1.57398	-1.08289	-0.285301	-0.79759
	1.57498	-1.08286	-0.285292	-0.797572
	1.57598	-1.08284	-0.285283	-0.797555
	1.57698	-1.08281	-0.285274	-0.797537
	1.57798	-1.08278	-0.285264	-0.79752
	1.57898	-1.08276	-0.285255	-0.797503
	1.57998	-1.08273	-0.285246	-0.797485
	1.58098	-1.0827	-0.285236	-0.797468
	1.58198	-1.08268	-0.285227	-0.797451
	1.58298	-1.08265	-0.285217	-0.797433
	1.58398	-1.08262	-0.285207	-0.797416
	1.58498	-1.0826	-0.285197	-0.797398
	1.58598	-1.08257	-0.285187	-0.797381
	1.58698	-1.08254	-0.285177	-0.797364
	1.58798	-1.08251	-0.285166	-0.797346
	1.58898	-1.08248	-0.285156	-0.797329
	1.58998	-1.08246	-0.285144	-0.797312
	1.59098	-1.08243	-0.285133	-0.797294
	1.59198	-1.0824	-0.285121	-0.797277
	1.59298	-1.08237	-0.285109	-0.797259
	1.59398	-1.08234	-0.285097	-0.797242
	1.59498	-1.08231	-0.285084	-0.797225
	1.59598	-1.08228	-0.285071	-0.797207
	1.59698	-1.08225	-0.285057	-0.79719
	1.59798	-1.08222	-0.285043	-0.797173
	1.59898	-1.08218	-0.285029	-0.797155
	1.59998	-1.08215	-0.285014	-0.797138
	1.60098	-1.08212	-0.284999	-0.79712
	1.60198	-1.08209	-0.284983	-0.797103
	1.60298	-1.08205	-0.284966	-0.797086
	1.60398	-1.08202	-0.284949	-0.797068
	1.60498	-1.08198	-0.284931	-0.797051
	1.60598	-1.08195	-0.284913	-0.797034
	1.60698	-1.08191	-0.284894	-0.797016
	1.60798	-1.08187	-0.284875	-0.796999
	1.60898	-1.08184	-0.284854	-0.796981
	1.60998	-1.0818	-0.284834	-0.796964
	1.61098	-1.08176	-0.284813	-0.796947
	1.61198	-1.08172	-0.284791	-0.796929
	1.61298	-1.08168	-0.284769	-0.796912
	1.61398	-1.08164	-0.284747	-0.796895
	1.61498	-1.0816	-0.284724	-0.796877
	1.61598	-1.08156	-0.2847	-0.79686
	1.61698	-1.08152	-0.284676	-0.796843
	1.61798	-1.08148	-0.284652	-0.796825
	1.61898	-1.08144	-0.284628	-0.796808
	1.61998	-1.08139	-0.284603	-0.79679
	1.62098	-1.08135	-0.284577	-0.796773
	1.62198	-1.08131	-0.284552	-0.796756
	1.62298	-1.08126	-0.284526	-0.796738
	1.62398	-1.08122	-0.284499	-0.796721
	1.62498	-1.08118	-0.284473	-0.796704
	1.62598	-1.08113	-0.284446	-0.796686
	1.62698	-1.08109	-0.284419	-0.796669
	1.62798	-1.08104	-0.284392	-0.796651
	1.62898	-1.081	-0.284364	-0.796634
	1.62998	-1.08095	-0.284337	-0.796617
	1.63098	-1.08091	-0.284309	-0.796599
	1.63198	-1.08086	-0.284281	-0.796582
	1.63298	-1.08082	-0.284253	-0.796565
	1.63398	-1.08077	-0.284225	-0.796547
	1.63498	-1.08073	-0.284196	-0.79653
	1.63598	-1.08068	-0.284168	-0.796512
	1.63698	-1.08063	-0.28414	-0.796495
	1.63798	-1.08059	-0.284111	-0.796478
	1.63898	-1.08054	-0.284083	-0.79646
	1.63998	-1.0805	-0.284054	-0.796443
	1.64098	-1.08045	-0.284026	-0.796426
	1.64198	-1.08041	-0.283997	-0.796408
	1.64298	-1.08036	-0.283969	-0.796391
	1.64398	-1.08031	-0.28394	-0.796373
	1.64498	-1.08027	-0.283912	-0.796356
	1.64598	-1.08022	-0.283884	-0.796339
	1.64698	-1.08018	-0.283856	-0.796321
	1.64798	-1.08013	-0.283828	-0.796304
	1.64898	-1.08009	-0.2838	-0.796287
	1.64998	-1.08004	-0.283772	-0.796269
	1.65098	-1.08	-0.283745	-0.796252
	1.65198	-1.07995	-0.283717	-0.796234
	1.65298	-1.07991	-0.28369	-0.796217
	1.65398	-1.07986	-0.283664	-0.7962
	1.65498	-1.07982	-0.283637	-0.796182
	1.65598	-1.07978	-0.283611	-0.796165
	1.65698	-1.07973	-0.283585	-0.796148
	1.65798	-1.07969	-0.283559	-0.79613
	1.65898	-1.07965	-0.283534	-0.796113
	1.65998	-1.0796	-0.283509	-0.796095
	1.66098	-1.07956	-0.283484	-0.796078
	1.66198	-1.07952	-0.28346	-0.796061
	1.66298	-1.07948	-0.283436	-0.796043
	1.66398	-1.07944	-0.283412	-0.796026
	1.66498	-1.0794	-0.283389	-0.796009
	1.66598	-1.07936	-0.283367	-0.795991
	1.66698	-1.07932	-0.283345	-0.795974
	1.66798	-1.07928	-0.283323	-0.795956
	1.66898	-1.07924	-0.283302	-0.795939
	1.66998	-1.0792	-0.283281	-0.795922
	1.67098	-1.07917	-0.283261	-0.795904
	1.67198	-1.07913	-0.283241	-0.795887
	1.67298	-1.07909	-0.283222	-0.79587
	1.67398	-1.07906	-0.283203	-0.795852
	1.67498	-1.07902	-0.283184	-0.795835
	1.67598	-1.07898	-0.283166	-0.795817
	1.67698	-1.07895	-0.283149	-0.7958
	1.67798	-1.07891	-0.283132	-0.795783
	1.67898	-1.07888	-0.283115	-0.795765
	1.67998	-1.07885	-0.283098	-0.795748
	1.68098	-1.07881	-0.283082	-0.795731
	1.68198	-1.07878	-0.283066	-0.795713
	1.68298	-1.07875	-0.283051	-0.795696
	1.68398	-1.07871	-0.283036	-0.795678
	1.68498	-1.07868	-0.283021	-0.795661
	1.68598	-1.07865	-0.283007	-0.795644
	1.68698	-1.07862	-0.282993	-0.795626
	1.68798	-1.07859	-0.282979	-0.795609
	1.68898	-1.07856	-0.282965	-0.795592
	1.68998	-1.07853	-0.282952	-0.795574
	1.69098	-1.0785	-0.282939	-0.795557
	1.69198	-1.07847	-0.282926	-0.795539
	1.69298	-1.07844	-0.282914	-0.795522
	1.69398	-1.07841	-0.282901	-0.795505
	1.69498	-1.07838	-0.282889	-0.795487
	1.69598	-1.07835	-0.282878	-0.79547
	1.69698	-1.07832	-0.282866	-0.795453
	1.69798	-1.07829	-0.282855	-0.795435
	1.69898	-1.07826	-0.282843	-0.795418
	1.69998	-1.07823	-0.282832	-0.7954
	1.70098	-1.0782	-0.282822	-0.795383
	1.70198	-1.07818	-0.282811	-0.795366
	1.70298	-1.07815	-0.2828	-0.795348
	1.70398	-1.07812	-0.28279	-0.795331
	1.70498	-1.07809	-0.28278	-0.795314
	1.70598	-1.07807	-0.282769	-0.795296
	1.70698	-1.07804	-0.282759	-0.795279
	1.70798	-1.07801	-0.282749	-0.795261
	1.70898	-1.07798	-0.28274	-0.795244
	1.70998	-1.07796	-0.28273	-0.795227
	1.71098	-1.07793	-0.28272	-0.795209
	1.71198	-1.0779	-0.282711	-0.795192
	1.71298	-1.07788	-0.282701	-0.795175
	1.71398	-1.07785	-0.282691	-0.795157
	1.71498	-1.07782	-0.282682	-0.79514
	1.71598	-1.07779	-0.282672	-0.795122
	1.71698	-1.07777	-0.282663	-0.795105
	1.71798	-1.07774	-0.282653	-0.795088
	1.71898	-1.07771	-0.282644	-0.79507
	1.71998	-1.07769	-0.282635	-0.795053
	1.72098	-1.07766	-0.282625	-0.795036
	1.72198	-1.07763	-0.282615	-0.795018
	1.72298	-1.07761	-0.282606	-0.795001
	1.72398	-1.07758	-0.282596	-0.794983
	1.72498	-1.07755	-0.282586	-0.794966
	1.72598	-1.07753	-0.282577	-0.794949
	1.72698	-1.0775	-0.282567	-0.794931
	1.72798	-1.07747	-0.282557	-0.794914
	1.72898	-1.07744	-0.282547	-0.794897
	1.72998	-1.07742	-0.282536	-0.794879
	1.73098	-1.07739	-0.282526	-0.794862
	1.73198	-1.07736	-0.282516	-0.794844
	1.73298	-1.07733	-0.282505	-0.794827
	1.73398	-1.0773	-0.282494	-0.79481
	1.73498	-1.07728	-0.282484	-0.794792
	1.73598	-1.07725	-0.282473	-0.794775
	1.73698	-1.07722	-0.282462	-0.794758
	1.73798	-1.07719	-0.282451	-0.79474
	1.73898	-1.07716	-0.282439	-0.794723
	1.73998	-1.07713	-0.282428	-0.794706
	1.74098	-1.0771	-0.282417	-0.794688
	1.74198	-1.07708	-0.282405	-0.794671
	1.74298	-1.07705	-0.282393	-0.794653
	1.74398	-1.07702	-0.282382	-0.794636
	1.74498	-1.07699	-0.28237	-0.794619
	1.74598	-1.07696	-0.282358	-0.794601
	1.74698	-1.07693	-0.282346	-0.794584
	1.74798	-1.0769	-0.282334	-0.794567
	1.74898	-1.07687	-0.282322	-0.794549
	1.74998	-1.07684	-0.282309	-0.794532
	1.75098	-1.07681	-0.282297	-0.794514
	1.75198	-1.07678	-0.282284	-0.794497
	1.75298	-1.07675	-0.282272	-0.79448
	1.75398	-1.07672	-0.282259	-0.794462
	1.75498	-1.07669	-0.282247	-0.794445
	1.75598	-1.07666	-0.282234	-0.794428
	1.75698	-1.07663	-0.282221	-0.79441
	1.75798	-1.0766	-0.282208	-0.794393
	1.75898	-1.07657	-0.282195	-0.794375
	1.75998	-1.07654	-0.282182	-0.794358
	1.76098	-1.07651	-0.282169	-0.794341
	1.76198	-1.07648	-0.282156	-0.794323
	1.76298	-1.07645	-0.282143	-0.794306
	1.76398	-1.07642	-0.28213	-0.794289
	1.76498	-1.07639	-0.282116	-0.794271
	1.76598	-1.07636	-0.282103	-0.794254
	1.76698	-1.07633	-0.28209	-0.794236
	1.76798	-1.0763	-0.282076	-0.794219
	1.76898	-1.07626	-0.282063	-0.794202
	1.76998	-1.07623	-0.282049	-0.794184
	1.77098	-1.0762	-0.282035	-0.794167
	1.77198	-1.07617	-0.282022	-0.79415
	1.77298	-1.07614	-0.282008	-0.794132
	1.77398	-1.07611	-0.281995	-0.794115
	1.77498	-1.07608	-0.281981	-0.794097
	1.77598	-1.07605	-0.281967	-0.79408
	1.77698	-1.07602	-0.281953	-0.794063
	1.77798	-1.07598	-0.281939	-0.794045
	1.77898	-1.07595	-0.281926	-0.794028
	1.77998	-1.07592	-0.281912	-0.794011
	1.78098	-1.07589	-0.281898	-0.793993
	1.78198	-1.07586	-0.281884	-0.793976
	1.78298	-1.07583	-0.28187	-0.793958
	1.78398	-1.0758	-0.281856	-0.793941
	1.78498	-1.07577	-0.281842	-0.793924
	1.78598	-1.07573	-0.281828	-0.793906
	1.78698	-1.0757	-0.281814	-0.793889
	1.78798	-1.07567	-0.2818	-0.793872
	1.78898	-1.07564	-0.281786	-0.793854
	1.78998	-1.07561	-0.281772	-0.793837
	1.79098	-1.07558	-0.281758	-0.793819
	1.79198	-1.07555	-0.281744	-0.793802
	1.79298	-1.07551	-0.28173	-0.793785
	1.79398	-1.07548	-0.281716	-0.793767
	1.79498	-1.07545	-0.281702	-0.79375
	1.79598	-1.07542	-0.281688	-0.793733
	1.79698	-1.07539	-0.281674	-0.793715
	1.79798	-1.07536	-0.28166	-0.793698
	1.79898	-1.07533	-0.281646	-0.79368
	1.79998	-1.0753	-0.281633	-0.793663
	1.80098	-1.07526	-0.281619	-0.793646
	1.80198	-1.07523	-0.281605	-0.793628
	1.80298	-1.0752	-0.281591	-0.793611
	1.80398	-1.07517	-0.281577	-0.793594
	1.80498	-1.07514	-0.281563	-0.793576
	1.80598	-1.07511	-0.281549	-0.793559
	1.80698	-1.07508	-0.281536	-0.793541
	1.80798	-1.07505	-0.281522	-0.793524
	1.80898	-1.07501	-0.281508	-0.793507
	1.80998	-1.07498	-0.281495	-0.793489
	1.81098	-1.07495	-0.281481	-0.793472
	1.81198	-1.07492	-0.281467	-0.793455
	1.81298	-1.07489	-0.281454	-0.793437
	1.81398	-1.07486	-0.28144	-0.79342
	1.81498	-1.07483	-0.281427	-0.793402
	1.81598	-1.0748	-0.281413	-0.793385
	1.81698	-1.07477	-0.2814	-0.793368
	1.81798	-1.07474	-0.281387	-0.79335
	1.81898	-1.07471	-0.281373	-0.793333
	1.81998	-1.07468	-0.28136	-0.793316
	1.82098	-1.07464	-0.281347	-0.793298
	1.82198	-1.07461	-0.281334	-0.793281
	1.82298	-1.07458	-0.28132	-0.793263
	1.82398	-1.07455	-0.281307	-0.793246
	1.82498	-1.07452	-0.281294	-0.793229
	1.82598	-1.07449	-0.281281	-0.793211
	1.82698	-1.07446	-0.281269	-0.793194
	1.82798	-1.07443	-0.281256	-0.793177
	1.82898	-1.0744	-0.281243	-0.793159
	1.82998	-1.07437	-0.28123	-0.793142
	1.83098	-1.07434	-0.281218	-0.793124
	1.83198	-1.07431	-0.281205	-0.793107
	1.83298	-1.07428	-0.281193	-0.79309
	1.83398	-1.07425	-0.28118	-0.793072
	1.83498	-1.07422	-0.281168	-0.793055
	1.83598	-1.07419	-0.281156	-0.793038
	1.83698	-1.07416	-0.281144	-0.79302
	1.83798	-1.07413	-0.281131	-0.793003
	1.83898	-1.0741	-0.281119	-0.792985
	1.83998	-1.07408	-0.281107	-0.792968
	1.84098	-1.07405	-0.281096	-0.792951
	1.84198	-1.07402	-0.281084	-0.792933
	1.84298	-1.07399	-0.281072	-0.792916
	1.84398	-1.07396	-0.281061	-0.792899
	1.84498	-1.07393	-0.281049	-0.792881
	1.84598	-1.0739	-0.281038	-0.792864
	1.84698	-1.07387	-0.281026	-0.792846
	1.84798	-1.07384	-0.281015	-0.792829
	1.84898	-1.07382	-0.281004	-0.792812
	1.84998	-1.07379	-0.280993	-0.792794
	1.85098	-1.07376	-0.280982	-0.792777
	1.85198	-1.07373	-0.280971	-0.79276
	1.85298	-1.0737	-0.28096	-0.792742
	1.85398	-1.07367	-0.28095	-0.792725
	1.85498	-1.07365	-0.280939	-0.792707
	1.85598	-1.07362	-0.280929	-0.79269
	1.85698	-1.07359	-0.280919	-0.792673
	1.85798	-1.07356	-0.280908	-0.792655
	1.85898	-1.07354	-0.280898	-0.792638
	1.85998	-1.07351	-0.280888	-0.792621
	1.86098	-1.07348	-0.280878	-0.792603
	1.86198	-1.07345	-0.280868	-0.792586
	1.86298	-1.07343	-0.280858	-0.792568
	1.86398	-1.0734	-0.280848	-0.792551
	1.86498	-1.07337	-0.280839	-0.792534
	1.86598	-1.07335	-0.280829	-0.792516
	1.86698	-1.07332	-0.280819	-0.792499
	1.86798	-1.07329	-0.280809	-0.792482
	1.86898	-1.07326	-0.280799	-0.792464
	1.86998	-1.07324	-0.28079	-0.792447
	1.87098	-1.07321	-0.28078	-0.79243
	1.87198	-1.07318	-0.28077	-0.792412
	1.87298	-1.07315	-0.28076	-0.792395
	1.87398	-1.07313	-0.28075	-0.792377
	1.87498	-1.0731	-0.28074	-0.79236
	1.87598	-1.07307	-0.28073	-0.792343
	1.87698	-1.07304	-0.28072	-0.792325
	1.87798	-1.07302	-0.280709	-0.792308
	1.87898	-1.07299	-0.280699	-0.792291
	1.87998	-1.07296	-0.280688	-0.792273
	1.88098	-1.07293	-0.280678	-0.792256
	1.88198	-1.07291	-0.280667	-0.792238
	1.88298	-1.07288	-0.280656	-0.792221
	1.88398	-1.07285	-0.280645	-0.792204
	1.88498	-1.07282	-0.280634	-0.792186
	1.88598	-1.07279	-0.280623	-0.792169
	1.88698	-1.07276	-0.280612	-0.792152
	1.88798	-1.07273	-0.2806	-0.792134
	1.88898	-1.0727	-0.280588	-0.792117
	1.88998	-1.07268	-0.280576	-0.792099
	1.89098	-1.07265	-0.280564	-0.792082
	1.89198	-1.07262	-0.280552	-0.792065
	1.89298	-1.07259	-0.280539	-0.792047
	1.89398	-1.07256	-0.280526	-0.79203
	1.89498	-1.07253	-0.280513	-0.792013
	1.89598	-1.07249	-0.2805	-0.791995
	1.89698	-1.07246	-0.280486	-0.791978
	1.89798	-1.07243	-0.280472	-0.79196
	1.89898	-1.0724	-0.280458	-0.791943
	1.89998	-1.07237	-0.280444	-0.791926
	1.90098	-1.07234	-0.280429	-0.791908
	1.90198	-1.07231	-0.280414	-0.791891
	1.90298	-1.07227	-0.280399	-0.791874
	1.90398	-1.07224	-0.280383	-0.791856
	1.90498	-1.07221	-0.280367	-0.791839
	1.90598	-1.07217	-0.280351	-0.791821
	1.90698	-1.07214	-0.280335	-0.791804
	1.90798	-1.0721	-0.280318	-0.791787
	1.90898	-1.07207	-0.2803	-0.791769
	1.90998	-1.07203	-0.280283	-0.791752
	1.91098	-1.072	-0.280265	-0.791735
	1.91198	-1.07196	-0.280246	-0.791717
	1.91298	-1.07193	-0.280228	-0.7917
	1.91398	-1.07189	-0.280208	-0.791682
	1.91498	-1.07185	-0.280189	-0.791665
	1.91598	-1.07182	-0.280169	-0.791648
	1.91698	-1.07178	-0.280148	-0.79163
	1.91798	-1.07174	-0.280127	-0.791613
	1.91898	-1.0717	-0.280106	-0.791596
	1.91998	-1.07166	-0.280084	-0.791578
	1.92098	-1.07162	-0.280062	-0.791561
	1.92198	-1.07158	-0.28004	-0.791543
	1.92298	-1.07154	-0.280017	-0.791526
	1.92398	-1.0715	-0.279994	-0.791509
	1.92498	-1.07146	-0.27997	-0.791491
	1.92598	-1.07142	-0.279946	-0.791474
	1.92698	-1.07138	-0.279922	-0.791457
	1.92798	-1.07134	-0.279897	-0.791439
	1.92898	-1.07129	-0.279872	-0.791422
	1.92998	-1.07125	-0.279847	-0.791404
	1.93098	-1.07121	-0.279822	-0.791387
	1.93198	-1.07117	-0.279796	-0.79137
	1.93298	-1.07112	-0.27977	-0.791352
	1.93398	-1.07108	-0.279744	-0.791335
	1.93498	-1.07104	-0.279718	-0.791318
	1.93598	-1.07099	-0.279692	-0.7913
	1.93698	-1.07095	-0.279665	-0.791283
	1.93798	-1.0709	-0.279638	-0.791265
	1.93898	-1.07086	-0.279611	-0.791248
	1.93998	-1.07081	-0.279584	-0.791231
	1.94098	-1.07077	-0.279557	-0.791213
	1.94198	-1.07073	-0.279529	-0.791196
	1.94298	-1.07068	-0.279502	-0.791179
	1.94398	-1.07064	-0.279474	-0.791161
	1.94498	-1.07059	-0.279447	-0.791144
	1.94598	-1.07055	-0.279419	-0.791126
	1.94698	-1.0705	-0.279391	-0.791109
	1.94798	-1.07046	-0.279363	-0.791092
	1.94898	-1.07041	-0.279336	-0.791074
	1.94998	-1.07036	-0.279308	-0.791057
	1.95098	-1.07032	-0.27928	-0.79104
	1.95198	-1.07027	-0.279252	-0.791022
	1.95298	-1.07023	-0.279225	-0.791005
	1.95398	-1.07018	-0.279197	-0.790987
	1.95498	-1.07014	-0.279169	-0.79097
	1.95598	-1.07009	-0.279142	-0.790953
	1.95698	-1.07005	-0.279114	-0.790935
	1.95798	-1.07001	-0.279087	-0.790918
	1.95898	-1.06996	-0.27906	-0.790901
	1.95998	-1.06992	-0.279033	-0.790883
	1.96098	-1.06987	-0.279006	-0.790866
	1.96198	-1.06983	-0.278979	-0.790848
	1.96298	-1.06978	-0.278953	-0.790831
	1.96398	-1.06974	-0.278926	-0.790814
	1.96498	-1.0697	-0.2789	-0.790796
	1.96598	-1.06965	-0.278874	-0.790779
	1.96698	-1.06961	-0.278848	-0.790762
	1.96798	-1.06957	-0.278823	-0.790744
	1.96898	-1.06952	-0.278798	-0.790727
	1.96998	-1.06948	-0.278773	-0.790709
	1.97098	-1.06944	-0.278748	-0.790692
	1.97198	-1.0694	-0.278723	-0.790675
	1.97298	-1.06936	-0.278699	-0.790657
	1.97398	-1.06932	-0.278676	-0.79064
	1.97498	-1.06927	-0.278652	-0.790623
	1.97598	-1.06923	-0.278629	-0.790605
	1.97698	-1.06919	-0.278606	-0.790588
	1.97798	-1.06915	-0.278584	-0.79057
	1.97898	-1.06912	-0.278562	-0.790553
	1.97998	-1.06908	-0.278541	-0.790536
	1.98098	-1.06904	-0.27852	-0.790518
	1.98198	-1.069	-0.278499	-0.790501
	1.98298	-1.06896	-0.278479	-0.790484
	1.98398	-1.06892	-0.278459	-0.790466
	1.98498	-1.06889	-0.278439	-0.790449
	1.98598	-1.06885	-0.27842	-0.790431
	1.98698	-1.06882	-0.278401	-0.790414
	1.98798	-1.06878	-0.278383	-0.790397
	1.98898	-1.06874	-0.278365	-0.790379
	1.98998	-1.06871	-0.278347	-0.790362
	1.99098	-1.06867	-0.27833	-0.790345
	1.99198	-1.06864	-0.278313	-0.790327
	1.99298	-1.06861	-0.278296	-0.79031
	1.99398	-1.06857	-0.27828	-0.790292
	1.99498	-1.06854	-0.278264	-0.790275
	1.99598	-1.06851	-0.278248	-0.790258
	1.99698	-1.06847	-0.278233	-0.79024
	1.99798	-1.06844	-0.278217	-0.790223
[truncated: 92,483 more rows]

## Sheet: Supplementary Figure 8
Supplementary Figure 8	Time	Scanning galvo	Shearing galvo	Camera trigger	Laser shutter
	0.00099999	-0.9105	-1.13813	1	0
	0.00199998	-0.9105	-1.13813	1	0
	0.00299997	-0.9105	-1.13813	1	0
	0.00399996	-0.9105	-1.13813	1	0
	0.00499995	-0.9105	-1.13813	1	0
	0.00599994	-0.9105	-1.13813	1	0
	0.00699993	-0.9105	-1.13813	1	0
	0.00799992	-0.9105	-1.13813	1	0
	0.00899991	-0.9105	-1.13813	1	0
	0.0099999	-0.9105	-1.13813	1	0
	0.0109999	-0.9105	-1.13813	1	0
	0.0119999	-0.9105	-1.13813	1	0
	0.0129999	-0.9105	-1.13813	1	0
	0.0139999	-0.9105	-1.13813	1	0
	0.0149999	-0.9105	-1.13813	1	0
	0.0159998	-0.9105	-1.13813	1	0
	0.0169998	-0.9105	-1.13813	1	0
	0.0179998	-0.9105	-1.13813	1	0
	0.0189998	-0.9105	-1.13813	1	0
	0.0199998	-0.9105	-1.13813	1	0
	0.0209998	-0.9105	-1.13813	0	0
	0.0219998	-0.9105	-1.13813	0	0
	0.0229998	-0.9105	-1.13813	0	0
	0.0239998	-0.9105	-1.13813	0	0
	0.0249998	-0.9105	-1.13813	0	0
	0.0259997	-0.9105	-1.13813	0	0
	0.0269997	-0.9105	-1.13813	0	0
	0.0279997	-0.9105	-1.13813	0	0
	0.0289997	-0.9105	-1.13813	0	0
	0.0299997	-0.9105	-1.13813	0	0
	0.0309997	-0.9105	-1.13813	0	0
	0.0319997	-0.9105	-1.13813	0	0
	0.0329997	-0.9105	-1.13813	0	0
	0.0339997	-0.9105	-1.13813	0	0
	0.0349997	-0.9105	-1.13813	0	0
	0.0359996	-0.9105	-1.13813	0	0
	0.0369996	-0.9105	-1.13813	0	0
	0.0379996	-0.9105	-1.13813	0	0
	0.0389996	-0.9105	-1.13813	0	0
	0.0399996	-0.9105	-1.13813	0	0
	0.0409996	-0.9105	-1.13813	0	0
	0.0419996	-0.9105	-1.13813	0	0
	0.0429996	-0.9105	-1.13813	0	0
	0.0439996	-0.9105	-1.13813	0	0
	0.0449996	-0.9105	-1.13813	0	0
	0.0459995	-0.9105	-1.13813	0	0
	0.0469995	-0.9105	-1.13813	0	0
	0.0479995	-0.9105	-1.13813	0	0
	0.0489995	-0.9105	-1.13813	0	0
	0.0499995	-0.9105	-1.13813	0	0
	0.0509995	-0.9105	-1.13813	0	0
	0.0519995	-0.9105	-1.13813	0	0
	0.0529995	-0.9105	-1.13813	0	0
	0.0539995	-0.9105	-1.13813	0	0
	0.0549995	-0.9105	-1.13813	0	0
	0.0559994	-0.9105	-1.13813	0	0
	0.0569994	-0.9105	-1.13813	0	0
	0.0579994	-0.9105	-1.13813	0	0
	0.0589994	-0.9105	-1.13813	0	0
	0.0599994	-0.9105	-1.13813	0	0
	0.0609994	-0.9105	-1.13813	0	0
	0.0619994	-0.9105	-1.13813	0	0
	0.0629994	-0.9105	-1.13813	0	0
	0.0639994	-0.9105	-1.13813	0	0
	0.0649994	-0.9105	-1.13813	0	0
	0.0659993	-0.9105	-1.13813	0	0
	0.0669993	-0.9105	-1.13813	0	0
	0.0679993	-0.9105	-1.13813	0	0
	0.0689993	-0.9105	-1.13813	0	0
	0.0699993	-0.9105	-1.13813	0	0
	0.0709993	-0.9105	-1.13813	0	0
	0.0719993	-0.9105	-1.13813	0	0
	0.0729993	-0.9105	-1.13813	0	0
	0.0739993	-0.9105	-1.13813	0	0
	0.0749993	-0.9105	-1.13813	0	0
	0.0759992	-0.9105	-1.13813	0	0
	0.0769992	-0.9105	-1.13813	0	0
	0.0779992	-0.9105	-1.13813	0	0
	0.0789992	-0.9105	-1.13813	0	0
	0.0799992	-0.9105	-1.13813	0	0
	0.0809992	-0.9105	-1.13813	0	0
	0.0819992	-0.9105	-1.13813	0	0
	0.0829992	-0.9105	-1.13813	0	0
	0.0839992	-0.9105	-1.13813	0	0
	0.0849992	-0.9105	-1.13813	0	0
	0.0859991	-0.9105	-1.13813	0	0
	0.0869991	-0.9105	-1.13813	0	0
	0.0879991	-0.9105	-1.13813	0	0
	0.0889991	-0.9105	-1.13813	0	0
	0.0899991	-0.9105	-1.13813	0	0
	0.0909991	-0.9105	-1.13813	0	0
	0.0919991	-0.9105	-1.13813	0	0
	0.0929991	-0.9105	-1.13813	0	0
	0.0939991	-0.9105	-1.13813	0	0
	0.0949991	-0.9105	-1.13813	0	0
	0.095999	-0.9105	-1.13813	0	0
	0.096999	-0.9105	-1.13813	0	0
	0.097999	-0.9105	-1.13813	0	0
	0.098999	-0.9105	-1.13813	0	0
	0.099999	-0.9105	-1.13813	0	0
	0.100999	-0.9105	-1.13813	0	0
	0.101999	-0.9105	-1.13813	0	0
	0.102999	-0.9105	-1.13813	0	0
	0.103999	-0.9105	-1.13813	0	0
	0.104999	-0.9105	-1.13813	0	0
	0.105999	-0.9105	-1.13813	0	0
	0.106999	-0.9105	-1.13813	0	0
	0.107999	-0.9105	-1.13813	0	0
	0.108999	-0.9105	-1.13813	0	0
	0.109999	-0.9105	-1.13813	0	0
	0.110999	-0.9105	-1.13813	0	0
	0.111999	-0.9105	-1.13813	0	0
	0.112999	-0.9105	-1.13813	0	0
	0.113999	-0.9105	-1.13813	0	0
	0.114999	-0.9105	-1.13813	0	0
	0.115999	-0.9105	-1.13813	0	0
	0.116999	-0.9105	-1.13813	0	0
	0.117999	-0.9105	-1.13813	0	0
	0.118999	-0.9105	-1.13813	0	0
	0.119999	-0.9105	-1.13813	0	0
	0.120999	-0.9105	-1.13813	0	0
	0.121999	-0.9105	-1.13813	0	0
	0.122999	-0.9105	-1.13813	0	0
	0.123999	-0.9105	-1.13813	0	0
	0.124999	-0.9105	-1.13813	0	0
	0.125999	-0.9105	-1.13813	0	0
	0.126999	-0.9105	-1.13813	0	0
	0.127999	-0.9105	-1.13813	0	0
	0.128999	-0.9105	-1.13813	0	0
	0.129999	-0.9105	-1.13813	0	0
	0.130999	-0.9105	-1.13813	0	0
	0.131999	-0.9105	-1.13813	0	0
	0.132999	-0.9105	-1.13813	0	0
	0.133999	-0.9105	-1.13813	0	0
	0.134999	-0.9105	-1.13813	0	0
	0.135999	-0.9105	-1.13813	0	0
	0.136999	-0.9105	-1.13813	0	0
	0.137999	-0.9105	-1.13813	0	0
	0.138999	-0.9105	-1.13813	0	0
	0.139999	-0.9105	-1.13813	0	0
	0.140999	-0.9105	-1.13813	0	0
	0.141999	-0.9105	-1.13813	0	0
	0.142999	-0.9105	-1.13813	0	0
	0.143999	-0.9105	-1.13813	0	0
	0.144999	-0.9105	-1.13813	0	0
	0.145999	-0.9105	-1.13813	0	0
	0.146999	-0.9105	-1.13813	0	0
	0.147999	-0.9105	-1.13813	0	0
	0.148999	-0.9105	-1.13813	0	0
	0.149999	-0.9105	-1.13813	0	0
	0.150998	-0.9105	-1.13813	0	0
	0.151998	-0.9105	-1.13813	0	0
	0.152998	-0.9105	-1.13813	0	0
	0.153998	-0.9105	-1.13813	0	0
	0.154998	-0.9105	-1.13813	0	0
	0.155998	-0.9105	-1.13813	0	0
	0.156998	-0.9105	-1.13813	0	0
	0.157998	-0.9105	-1.13813	0	0
	0.158998	-0.9105	-1.13813	0	0
	0.159998	-0.9105	-1.13813	0	0
	0.160998	-0.9105	-1.13813	0	0
	0.161998	-0.9105	-1.13813	0	0
	0.162998	-0.9105	-1.13813	0	0
	0.163998	-0.9105	-1.13813	0	0
	0.164998	-0.9105	-1.13813	0	0
	0.165998	-0.9105	-1.13813	0	0
	0.166998	-0.9105	-1.13813	0	0
	0.167998	-0.9105	-1.13813	0	0
	0.168998	-0.9105	-1.13813	0	0
	0.169998	-0.9105	-1.13813	0	0
	0.170998	-0.9105	-1.13813	0	0
	0.171998	-0.9105	-1.13813	0	0
	0.172998	-0.9105	-1.13813	0	0
	0.173998	-0.9105	-1.13813	0	0
	0.174998	-0.9105	-1.13813	0	0
	0.175998	-0.9105	-1.13813	0	0
	0.176998	-0.9105	-1.13813	0	0
	0.177998	-0.9105	-1.13813	0	0
	0.178998	-0.9105	-1.13813	0	0
	0.179998	-0.9105	-1.13813	0	0
	0.180998	-0.9105	-1.13813	0	0
	0.181998	-0.9105	-1.13813	0	0
	0.182998	-0.9105	-1.13813	0	0
	0.183998	-0.9105	-1.13813	0	0
	0.184998	-0.9105	-1.13813	0	0
	0.185998	-0.9105	-1.13813	0	0
	0.186998	-0.9105	-1.13813	0	0
	0.187998	-0.9105	-1.13813	0	0
	0.188998	-0.9105	-1.13813	0	0
	0.189998	-0.9105	-1.13813	0	0
	0.190998	-0.9105	-1.13813	0	0
	0.191998	-0.9105	-1.13813	0	0
	0.192998	-0.9105	-1.13813	0	0
	0.193998	-0.9105	-1.13813	0	0
	0.194998	-0.9105	-1.13813	0	0
	0.195998	-0.9105	-1.13813	0	0
	0.196998	-0.9105	-1.13813	0	0
	0.197998	-0.9105	-1.13813	0	0
	0.198998	-0.9105	-1.13813	0	0
	0.199998	-0.9105	-1.13813	0	0
	0.200998	-0.9105	-1.13813	0	0
	0.201998	-0.9105	-1.13813	0	0
	0.202998	-0.9105	-1.13813	0	0
	0.203998	-0.9105	-1.13813	0	0
	0.204998	-0.9105	-1.13813	0	0
	0.205998	-0.9105	-1.13813	0	0
	0.206998	-0.9105	-1.13813	0	0
	0.207998	-0.9105	-1.13813	0	0
	0.208998	-0.9105	-1.13813	0	0
	0.209998	-0.9105	-1.13813	0	0
	0.210998	-0.9105	-1.13813	0	0
	0.211998	-0.9105	-1.13813	0	0
	0.212998	-0.9105	-1.13813	0	0
	0.213998	-0.9105	-1.13813	0	0
	0.214998	-0.9105	-1.13813	0	0
	0.215998	-0.9105	-1.13813	0	0
	0.216998	-0.9105	-1.13813	0	0
	0.217998	-0.9105	-1.13813	0	0
	0.218998	-0.9105	-1.13813	0	0
	0.219998	-0.9105	-1.13813	0	0
	0.220998	-0.9105	-1.13813	0	0
	0.221998	-0.9105	-1.13813	0	0
	0.222998	-0.9105	-1.13813	0	0
	0.223998	-0.9105	-1.13813	0	0
	0.224998	-0.9105	-1.13813	0	0
	0.225998	-0.9105	-1.13813	0	0
	0.226998	-0.9105	-1.13813	0	0
	0.227998	-0.9105	-1.13813	0	0
	0.228998	-0.9105	-1.13813	0	0
	0.229998	-0.9105	-1.13813	0	0
	0.230998	-0.9105	-1.13813	0	0
	0.231998	-0.9105	-1.13813	0	0
	0.232998	-0.9105	-1.13813	0	0
	0.233998	-0.9105	-1.13813	0	0
	0.234998	-0.9105	-1.13813	0	0
	0.235998	-0.9105	-1.13813	0	0
	0.236998	-0.9105	-1.13813	0	0
	0.237998	-0.9105	-1.13813	0	0
	0.238998	-0.9105	-1.13813	0	0
	0.239998	-0.9105	-1.13813	0	0
	0.240998	-0.9105	-1.13813	0	0
	0.241998	-0.9105	-1.13813	0	0
	0.242998	-0.9105	-1.13813	0	0
	0.243998	-0.9105	-1.13813	0	0
	0.244998	-0.9105	-1.13813	0	0
	0.245998	-0.9105	-1.13813	0	0
	0.246998	-0.9105	-1.13813	0	0
	0.247998	-0.9105	-1.13813	0	0
	0.248998	-0.9105	-1.13813	0	0
	0.249998	-0.9105	-1.13813	0	0
	0.250997	-0.9105	-1.13813	0	0
	0.251997	-0.9105	-1.13813	0	0
	0.252997	-0.9105	-1.13813	0	0
	0.253997	-0.9105	-1.13813	0	0
	0.254997	-0.9105	-1.13813	0	0
	0.255997	-0.9105	-1.13813	0	0
	0.256997	-0.9105	-1.13813	0	0
	0.257997	-0.9105	-1.13813	0	0
	0.258997	-0.9105	-1.13813	0	0
	0.259997	-0.9105	-1.13813	0	0
	0.260997	-0.9105	-1.13813	0	0
	0.261997	-0.9105	-1.13813	0	0
	0.262997	-0.9105	-1.13813	0	0
	0.263997	-0.9105	-1.13813	0	0
	0.264997	-0.9105	-1.13813	0	0
	0.265997	-0.9105	-1.13813	0	0
	0.266997	-0.9105	-1.13813	0	0
	0.267997	-0.9105	-1.13813	0	0
	0.268997	-0.9105	-1.13813	0	0
	0.269997	-0.9105	-1.13813	0	0
	0.270997	-0.9105	-1.13813	0	0
	0.271997	-0.9105	-1.13813	0	0
	0.272997	-0.9105	-1.13813	0	0
	0.273997	-0.9105	-1.13813	0	0
	0.274997	-0.9105	-1.13813	0	0
	0.275997	-0.9105	-1.13813	0	0
	0.276997	-0.9105	-1.13813	0	0
	0.277997	-0.9105	-1.13813	0	0
	0.278997	-0.9105	-1.13813	0	0
	0.279997	-0.9105	-1.13813	0	0
	0.280997	-0.9105	-1.13813	0	0
	0.281997	-0.9105	-1.13813	0	0
	0.282997	-0.9105	-1.13813	0	0
	0.283997	-0.9105	-1.13813	0	0
	0.284997	-0.9105	-1.13813	0	0
	0.285997	-0.9105	-1.13813	0	0
	0.286997	-0.9105	-1.13813	0	0
	0.287997	-0.9105	-1.13813	0	0
	0.288997	-0.9105	-1.13813	0	0
	0.289997	-0.9105	-1.13813	0	0
	0.290997	-0.9105	-1.13813	0	0
	0.291997	-0.9105	-1.13813	0	0
	0.292997	-0.9105	-1.13813	0	0
	0.293997	-0.9105	-1.13813	0	0
	0.294997	-0.9105	-1.13813	0	0
	0.295997	-0.9105	-1.13813	0	0
	0.296997	-0.9105	-1.13813	0	0
	0.297997	-0.9105	-1.13813	0	0
	0.298997	-0.9105	-1.13813	0	0
	0.299997	-0.9105	-1.13813	0	0
	0.300997	-0.9105	-1.13813	0	0
	0.301997	-0.9105	-1.13813	0	0
	0.302997	-0.9105	-1.13813	0	0
	0.303997	-0.9105	-1.13813	0	0
	0.304997	-0.9105	-1.13813	0	0
	0.305997	-0.9105	-1.13813	0	0
	0.306997	-0.9105	-1.13813	0	0
	0.307997	-0.9105	-1.13813	0	0
	0.308997	-0.9105	-1.13813	0	0
	0.309997	-0.9105	-1.13813	0	0
	0.310997	-0.9105	-1.13813	0	0
	0.311997	-0.9105	-1.13813	0	0
	0.312997	-0.9105	-1.13813	0	0
	0.313997	-0.9105	-1.13813	0	0
	0.314997	-0.9105	-1.13813	0	0
	0.315997	-0.9105	-1.13813	0	0
	0.316997	-0.9105	-1.13813	0	0
	0.317997	-0.9105	-1.13813	0	0
	0.318997	-0.9105	-1.13813	0	0
	0.319997	-0.9105	-1.13813	0	0
	0.320997	-0.9105	-1.13813	0	0
	0.321997	-0.9105	-1.13813	0	0
	0.322997	-0.9105	-1.13813	0	0
	0.323997	-0.9105	-1.13813	0	0
	0.324997	-0.9105	-1.13813	0	0
	0.325997	-0.9105	-1.13813	0	0
	0.326997	-0.9105	-1.13813	0	0
	0.327997	-0.9105	-1.13813	0	0
	0.328997	-0.9105	-1.13813	0	0
	0.329997	-0.9105	-1.13813	0	0
	0.330997	-0.9105	-1.13813	0	0
	0.331997	-0.9105	-1.13813	0	0
	0.332997	-0.9105	-1.13813	0	0
	0.333997	-0.9105	-1.13813	0	0
	0.334997	-0.9105	-1.13813	0	0
	0.335997	-0.9105	-1.13813	0	0
	0.336997	-0.9105	-1.13813	0	0
	0.337997	-0.9105	-1.13813	0	0
	0.338997	-0.9105	-1.13813	0	0
	0.339997	-0.9105	-1.13813	0	0
	0.340997	-0.9105	-1.13813	0	0
	0.341997	-0.9105	-1.13813	0	0
	0.342997	-0.9105	-1.13813	0	0
	0.343997	-0.9105	-1.13813	0	0
	0.344997	-0.9105	-1.13813	0	0
	0.345997	-0.9105	-1.13813	0	0
	0.346997	-0.9105	-1.13813	0	0
	0.347997	-0.9105	-1.13813	0	0
	0.348997	-0.9105	-1.13813	0	0
	0.349997	-0.9105	-1.13813	0	0
	0.350996	-0.9105	-1.13813	0	0
	0.351996	-0.9105	-1.13813	0	0
	0.352996	-0.9105	-1.13813	0	0
	0.353996	-0.9105	-1.13813	0	0
	0.354996	-0.9105	-1.13813	0	0
	0.355996	-0.9105	-1.13813	0	0
	0.356996	-0.9105	-1.13813	0	0
	0.357996	-0.9105	-1.13813	0	0
	0.358996	-0.9105	-1.13813	0	0
	0.359996	-0.9105	-1.13813	0	0
	0.360996	-0.9105	-1.13813	0	0
	0.361996	-0.9105	-1.13813	0	0
	0.362996	-0.9105	-1.13813	0	0
	0.363996	-0.9105	-1.13813	0	0
	0.364996	-0.9105	-1.13813	0	0
	0.365996	-0.9105	-1.13813	0	0
	0.366996	-0.9105	-1.13813	0	0
	0.367996	-0.9105	-1.13813	0	0
	0.368996	-0.9105	-1.13813	0	0
	0.369996	-0.9105	-1.13813	0	0
	0.370996	-0.9105	-1.13813	0	0
	0.371996	-0.9105	-1.13813	0	0
	0.372996	-0.9105	-1.13813	0	0
	0.373996	-0.9105	-1.13813	0	0
	0.374996	-0.9105	-1.13813	0	0
	0.375996	-0.9105	-1.13813	0	0
	0.376996	-0.9105	-1.13813	0	0
	0.377996	-0.9105	-1.13813	0	0
	0.378996	-0.9105	-1.13813	0	0
	0.379996	-0.9105	-1.13813	0	0
	0.380996	-0.9105	-1.13813	0	0
	0.381996	-0.9105	-1.13813	0	0
	0.382996	-0.9105	-1.13813	0	0
	0.383996	-0.9105	-1.13813	0	0
	0.384996	-0.9105	-1.13813	0	0
	0.385996	-0.9105	-1.13813	0	0
	0.386996	-0.9105	-1.13813	0	0
	0.387996	-0.9105	-1.13813	0	0
	0.388996	-0.9105	-1.13813	0	0
	0.389996	-0.9105	-1.13813	0	0
	0.390996	-0.9105	-1.13813	0	0
	0.391996	-0.9105	-1.13813	0	0
	0.392996	-0.9105	-1.13813	0	0
	0.393996	-0.9105	-1.13813	0	0
	0.394996	-0.9105	-1.13813	0	0
	0.395996	-0.9105	-1.13813	0	0
	0.396996	-0.9105	-1.13813	0	0
	0.397996	-0.9105	-1.13813	0	0
	0.398996	-0.9105	-1.13813	0	0
	0.399996	-0.9105	-1.13813	0	0
	0.400996	-0.9105	-1.13813	0	0
	0.401996	-0.9105	-1.13813	0	0
	0.402996	-0.9105	-1.13813	0	0
	0.403996	-0.9105	-1.13813	0	0
	0.404996	-0.9105	-1.13813	0	0
	0.405996	-0.9105	-1.13813	0	0
	0.406996	-0.9105	-1.13813	0	0
	0.407996	-0.9105	-1.13813	0	0
	0.408996	-0.9105	-1.13813	0	0
	0.409996	-0.9105	-1.13813	0	0
	0.410996	-0.9105	-1.13813	0	0
	0.411996	-0.9105	-1.13813	0	0
	0.412996	-0.9105	-1.13813	0	0
	0.413996	-0.9105	-1.13813	0	0
	0.414996	-0.9105	-1.13813	0	0
	0.415996	-0.9105	-1.13813	0	0
	0.416996	-0.9105	-1.13813	0	0
	0.417996	-0.9105	-1.13813	0	0
	0.418996	-0.9105	-1.13813	0	0
	0.419996	-0.9105	-1.13813	0	0
	0.420996	-0.9105	-1.13813	0	0
	0.421996	-0.9105	-1.13813	0	0
	0.422996	-0.9105	-1.13813	0	0
	0.423996	-0.9105	-1.13813	0	0
	0.424996	-0.9105	-1.13813	0	0
	0.425996	-0.9105	-1.13813	0	0
	0.426996	-0.9105	-1.13813	0	0
	0.427996	-0.9105	-1.13813	0	0
	0.428996	-0.9105	-1.13813	0	0
	0.429996	-0.9105	-1.13813	0	0
	0.430996	-0.9105	-1.13813	0	0
	0.431996	-0.9105	-1.13813	0	0
	0.432996	-0.9105	-1.13813	0	0
	0.433996	-0.9105	-1.13813	0	0
	0.434996	-0.9105	-1.13813	0	0
	0.435996	-0.9105	-1.13813	0	0
	0.436996	-0.9105	-1.13813	0	0
	0.437996	-0.9105	-1.13813	0	0
	0.438996	-0.9105	-1.13813	0	0
	0.439996	-0.9105	-1.13813	0	0
	0.440996	-0.9105	-1.13813	0	0
	0.441996	-0.9105	-1.13813	0	0
	0.442996	-0.9105	-1.13813	0	0
	0.443996	-0.9105	-1.13813	0	0
	0.444996	-0.9105	-1.13813	0	0
	0.445996	-0.9105	-1.13813	0	0
	0.446996	-0.9105	-1.13813	0	0
	0.447996	-0.9105	-1.13813	0	0
	0.448996	-0.9105	-1.13813	0	0
	0.449996	-0.9105	-1.13813	0	0
	0.450995	-0.9105	-1.13813	0	0
	0.451995	-0.9105	-1.13813	0	0
	0.452995	-0.9105	-1.13813	0	0
	0.453995	-0.9105	-1.13813	0	0
	0.454995	-0.9105	-1.13813	0	0
	0.455995	-0.9105	-1.13813	0	0
	0.456995	-0.9105	-1.13813	0	0
	0.457995	-0.9105	-1.13813	0	1
	0.458995	-0.9105	-1.13813	0	1
	0.459995	-0.9105	-1.13813	0	1
	0.460995	-0.9105	-1.13813	0	1
	0.461995	-0.9105	-1.13813	0	1
	0.462995	-0.9105	-1.13813	0	1
	0.463995	-0.9105	-1.13813	0	1
	0.464995	-0.9105	-1.13813	0	1
	0.465995	-0.9105	-1.13813	0	1
	0.466995	-0.9105	-1.13813	0	1
	0.467995	-0.9105	-1.13813	0	1
	0.468995	-0.9105	-1.13813	0	1
	0.469995	-0.9105	-1.13813	0	1
	0.470995	-0.9105	-1.13813	0	1
	0.471995	-0.9105	-1.13813	0	1
	0.472995	-0.9105	-1.13813	0	1
	0.473995	-0.9105	-1.13813	0	1
	0.474995	-0.9105	-1.13813	0	1
	0.475995	-0.9105	-1.13813	0	1
	0.476995	-0.9105	-1.13813	0	1
	0.477995	-0.9105	-1.13813	0	1
	0.478995	-0.9105	-1.13813	0	1
	0.479995	-0.9105	-1.13813	0	1
	0.480995	-0.9105	-1.13813	0	1
	0.481995	-0.9105	-1.13813	0	1
	0.482995	-0.9105	-1.13813	0	1
	0.483995	-0.9105	-1.13813	0	1
	0.484995	-0.9105	-1.13813	0	1
	0.485995	-0.9105	-1.13813	0	1
	0.486995	-0.9105	-1.13813	0	1
	0.487995	-0.9105	-1.13813	0	1
	0.488995	-0.9105	-1.13813	0	1
	0.489995	-0.9105	-1.13813	0	1
	0.490995	-0.9105	-1.13813	0	1
	0.491995	-0.9105	-1.13813	0	1
	0.492995	-0.9105	-1.13813	0	1
	0.493995	-0.9105	-1.13813	0	1
	0.494995	-0.9105	-1.13813	0	1
	0.495995	-0.9105	-1.13813	0	1
	0.496995	-0.9105	-1.13813	0	1
	0.497995	-0.9105	-1.13813	0	1
	0.498995	-0.9105	-1.13813	0	1
	0.499995	-0.9105	-1.13813	0	1
	0.500995	-0.9105	-1.13813	0	1
	0.501995	-0.910476	-1.13808	0	1
	0.502995	-0.910452	-1.13803	0	1
	0.503995	-0.910428	-1.13798	0	1
	0.504995	-0.910404	-1.13793	0	1
	0.505995	-0.91038	-1.13788	0	1
	0.506995	-0.910356	-1.13783	0	1
	0.507995	-0.910332	-1.13778	0	1
	0.508995	-0.910308	-1.13773	0	1
	0.509995	-0.910284	-1.13768	0	1
	0.510995	-0.91026	-1.13763	0	1
	0.511995	-0.910236	-1.13758	0	1
	0.512995	-0.910212	-1.13753	0	1
	0.513995	-0.910188	-1.13748	0	1
	0.514995	-0.910164	-1.13744	0	1
	0.515995	-0.91014	-1.13739	0	1
	0.516995	-0.910116	-1.13734	0	1
	0.517995	-0.910092	-1.13729	0	1
	0.518995	-0.910068	-1.13725	0	1
	0.519995	-0.910044	-1.1372	0	1
	0.520995	-0.910019	-1.13715	0	1
	0.521995	-0.909995	-1.13711	0	1
	0.522995	-0.909971	-1.13706	0	1
	0.523995	-0.909947	-1.13702	0	1
	0.524995	-0.909923	-1.13697	0	1
	0.525995	-0.909899	-1.13693	0	1
	0.526995	-0.909875	-1.13689	0	1
	0.527995	-0.909851	-1.13684	0	1
	0.528995	-0.909827	-1.1368	0	1
	0.529995	-0.909803	-1.13675	0	1
	0.530995	-0.909779	-1.13671	0	1
	0.531995	-0.909755	-1.13667	0	1
	0.532995	-0.909731	-1.13663	0	1
	0.533995	-0.909707	-1.13658	0	1
	0.534995	-0.909683	-1.13654	0	1
	0.535995	-0.909659	-1.1365	0	1
	0.536995	-0.909635	-1.13646	0	1
	0.537995	-0.909611	-1.13642	0	1
	0.538995	-0.909587	-1.13638	0	1
	0.539995	-0.909563	-1.13634	0	1
	0.540995	-0.909539	-1.1363	0	1
	0.541995	-0.909515	-1.13626	0	1
	0.542995	-0.909491	-1.13622	0	1
	0.543995	-0.909467	-1.13618	0	1
	0.544995	-0.909443	-1.13614	0	1
	0.545995	-0.909419	-1.1361	0	1
	0.546995	-0.909395	-1.13606	0	1
	0.547995	-0.909371	-1.13602	0	1
	0.548995	-0.909347	-1.13598	0	1
	0.549995	-0.909323	-1.13594	0	1
	0.550994	-0.909299	-1.13591	0	1
	0.551994	-0.909275	-1.13587	0	1
	0.552994	-0.909251	-1.13583	0	1
	0.553994	-0.909227	-1.13579	0	1
	0.554994	-0.909203	-1.13576	0	1
	0.555994	-0.909179	-1.13572	0	1
	0.556994	-0.909155	-1.13568	0	1
	0.557994	-0.909131	-1.13565	0	1
	0.558994	-0.909107	-1.13561	0	1
	0.559994	-0.909083	-1.13557	0	1
	0.560994	-0.909058	-1.13554	0	1
	0.561994	-0.909034	-1.1355	0	1
	0.562994	-0.90901	-1.13547	0	1
	0.563994	-0.908986	-1.13543	0	1
	0.564994	-0.908962	-1.1354	0	1
	0.565994	-0.908938	-1.13536	0	1
	0.566994	-0.908914	-1.13533	0	1
	0.567994	-0.90889	-1.13529	0	1
	0.568994	-0.908866	-1.13526	0	1
	0.569994	-0.908842	-1.13523	0	1
	0.570994	-0.908818	-1.13519	0	1
	0.571994	-0.908794	-1.13516	0	1
	0.572994	-0.90877	-1.13513	0	1
	0.573994	-0.908746	-1.13509	0	1
	0.574994	-0.908722	-1.13506	0	1
	0.575994	-0.908698	-1.13503	0	1
	0.576994	-0.908674	-1.13499	0	1
	0.577994	-0.90865	-1.13496	0	1
	0.578994	-0.908626	-1.13493	0	1
	0.579994	-0.908602	-1.1349	0	1
	0.580994	-0.908578	-1.13487	0	1
	0.581994	-0.908554	-1.13483	0	1
	0.582994	-0.90853	-1.1348	0	1
	0.583994	-0.908506	-1.13477	0	1
	0.584994	-0.908482	-1.13474	0	1
	0.585994	-0.908458	-1.13471	0	1
	0.586994	-0.908434	-1.13468	0	1
	0.587994	-0.90841	-1.13465	0	1
	0.588994	-0.908386	-1.13462	0	1
	0.589994	-0.908362	-1.13459	0	1
	0.590994	-0.908338	-1.13456	0	1
	0.591994	-0.908314	-1.13453	0	1
	0.592994	-0.90829	-1.13449	0	1
	0.593994	-0.908266	-1.13446	0	1
	0.594994	-0.908242	-1.13444	0	1
	0.595994	-0.908218	-1.13441	0	1
	0.596994	-0.908194	-1.13438	0	1
	0.597994	-0.90817	-1.13435	0	1
	0.598994	-0.908146	-1.13432	0	1
	0.599994	-0.908121	-1.13429	0	1
	0.600994	-0.908097	-1.13426	0	1
	0.601994	-0.908073	-1.13423	0	1
	0.602994	-0.908049	-1.1342	0	1
	0.603994	-0.908025	-1.13417	0	1
	0.604994	-0.908001	-1.13414	0	1
	0.605994	-0.907977	-1.13412	0	1
	0.606994	-0.907953	-1.13409	0	1
	0.607994	-0.907929	-1.13406	0	1
	0.608994	-0.907905	-1.13403	0	1
	0.609994	-0.907881	-1.134	0	1
	0.610994	-0.907857	-1.13397	0	1
	0.611994	-0.907833	-1.13395	0	1
	0.612994	-0.907809	-1.13392	0	1
	0.613994	-0.907785	-1.13389	0	1
	0.614994	-0.907761	-1.13386	0	1
	0.615994	-0.907737	-1.13384	0	1
	0.616994	-0.907713	-1.13381	0	1
	0.617994	-0.907689	-1.13378	0	1
	0.618994	-0.907665	-1.13375	0	1
	0.619994	-0.907641	-1.13373	0	1
	0.620994	-0.907617	-1.1337	0	1
	0.621994	-0.907593	-1.13367	0	1
	0.622994	-0.907569	-1.13365	0	1
	0.623994	-0.907545	-1.13362	0	1
	0.624994	-0.907521	-1.13359	0	1
	0.625994	-0.907497	-1.13357	0	1
	0.626994	-0.907473	-1.13354	0	1
	0.627994	-0.907449	-1.13351	0	1
	0.628994	-0.907425	-1.13349	0	1
	0.629994	-0.907401	-1.13346	0	1
	0.630994	-0.907377	-1.13343	0	1
	0.631994	-0.907353	-1.13341	0	1
	0.632994	-0.907329	-1.13338	0	1
	0.633994	-0.907305	-1.13335	0	1
	0.634994	-0.907281	-1.13333	0	1
	0.635994	-0.907257	-1.1333	0	1
	0.636994	-0.907233	-1.13328	0	1
	0.637994	-0.907209	-1.13325	0	1
	0.638994	-0.907185	-1.13322	0	1
	0.639994	-0.90716	-1.1332	0	1
	0.640994	-0.907136	-1.13317	0	1
	0.641994	-0.907112	-1.13314	0	1
	0.642994	-0.907088	-1.13312	0	1
	0.643994	-0.907064	-1.13309	0	1
	0.644994	-0.90704	-1.13306	0	1
	0.645994	-0.907016	-1.13304	0	1
	0.646994	-0.906992	-1.13301	0	1
	0.647994	-0.906968	-1.13298	0	1
	0.648994	-0.906944	-1.13295	0	1
	0.649994	-0.90692	-1.13293	0	1
	0.650993	-0.906896	-1.1329	0	1
	0.651993	-0.906872	-1.13287	0	1
	0.652993	-0.906848	-1.13284	0	1
	0.653993	-0.906824	-1.13281	0	1
	0.654993	-0.9068	-1.13279	0	1
	0.655993	-0.906776	-1.13276	0	1
	0.656993	-0.906752	-1.13273	0	1
	0.657993	-0.906728	-1.1327	0	1
	0.658993	-0.906704	-1.13267	0	1
	0.659993	-0.90668	-1.13264	0	1
	0.660993	-0.906656	-1.13261	0	1
	0.661993	-0.906632	-1.13258	0	1
	0.662993	-0.906608	-1.13255	0	1
	0.663993	-0.906584	-1.13252	0	1
	0.664993	-0.90656	-1.13249	0	1
	0.665993	-0.906536	-1.13246	0	1
	0.666993	-0.906512	-1.13243	0	1
	0.667993	-0.906488	-1.1324	0	1
	0.668993	-0.906464	-1.13237	0	1
	0.669993	-0.90644	-1.13234	0	1
	0.670993	-0.906416	-1.1323	0	1
	0.671993	-0.906392	-1.13227	0	1
	0.672993	-0.906368	-1.13224	0	1
	0.673993	-0.906344	-1.1322	0	1
	0.674993	-0.90632	-1.13217	0	1
	0.675993	-0.906296	-1.13214	0	1
	0.676993	-0.906272	-1.1321	0	1
	0.677993	-0.906248	-1.13207	0	1
	0.678993	-0.906223	-1.13203	0	1
	0.679993	-0.906199	-1.132	0	1
	0.680993	-0.906175	-1.13196	0	1
	0.681993	-0.906151	-1.13193	0	1
	0.682993	-0.906127	-1.13189	0	1
	0.683993	-0.906103	-1.13185	0	1
	0.684993	-0.906079	-1.13182	0	1
	0.685993	-0.906055	-1.13178	0	1
	0.686993	-0.906031	-1.13174	0	1
	0.687993	-0.906007	-1.1317	0	1
	0.688993	-0.905983	-1.13166	0	1
	0.689993	-0.905959	-1.13162	0	1
	0.690993	-0.905935	-1.13158	0	1
	0.691993	-0.905911	-1.13154	0	1
	0.692993	-0.905887	-1.1315	0	1
	0.693993	-0.905863	-1.13146	0	1
	0.694993	-0.905839	-1.13142	0	1
	0.695993	-0.905815	-1.13137	0	1
	0.696993	-0.905791	-1.13133	0	1
	0.697993	-0.905767	-1.13129	0	1
	0.698993	-0.905743	-1.13125	0	1
	0.699993	-0.905719	-1.1312	0	1
	0.700993	-0.905695	-1.13116	0	1
	0.701993	-0.905671	-1.13112	0	1
	0.702993	-0.905647	-1.13107	0	1
	0.703993	-0.905623	-1.13103	0	1
	0.704993	-0.905599	-1.13098	0	1
	0.705993	-0.905575	-1.13094	0	1
	0.706993	-0.905551	-1.13089	0	1
	0.707993	-0.905527	-1.13085	0	1
	0.708993	-0.905503	-1.1308	0	1
	0.709993	-0.905479	-1.13076	0	1
	0.710993	-0.905455	-1.13071	0	1
	0.711993	-0.905431	-1.13067	0	1
	0.712993	-0.905407	-1.13062	0	1
	0.713993	-0.905383	-1.13057	0	1
	0.714993	-0.905359	-1.13053	0	1
	0.715993	-0.905335	-1.13048	0	1
	0.716993	-0.905311	-1.13044	0	1
	0.717993	-0.905287	-1.13039	0	1
	0.718993	-0.905262	-1.13035	0	1
	0.719993	-0.905238	-1.1303	0	1
	0.720993	-0.905214	-1.13026	0	1
	0.721993	-0.90519	-1.13021	0	1
	0.722993	-0.905166	-1.13016	0	1
	0.723993	-0.905142	-1.13012	0	1
	0.724993	-0.905118	-1.13007	0	1
	0.725993	-0.905094	-1.13003	0	1
	0.726993	-0.90507	-1.12998	0	1
	0.727993	-0.905046	-1.12994	0	1
	0.728993	-0.905022	-1.12989	0	1
	0.729993	-0.904998	-1.12985	0	1
	0.730993	-0.904974	-1.12981	0	1
	0.731993	-0.90495	-1.12976	0	1
	0.732993	-0.904926	-1.12972	0	1
	0.733993	-0.904902	-1.12968	0	1
	0.734993	-0.904878	-1.12963	0	1
	0.735993	-0.904854	-1.12959	0	1
	0.736993	-0.90483	-1.12955	0	1
	0.737993	-0.904806	-1.12951	0	1
	0.738993	-0.904782	-1.12946	0	1
	0.739993	-0.904758	-1.12942	0	1
	0.740993	-0.904734	-1.12938	0	1
	0.741993	-0.90471	-1.12934	0	1
	0.742993	-0.904686	-1.1293	0	1
	0.743993	-0.904662	-1.12926	0	1
	0.744993	-0.904638	-1.12922	0	1
	0.745993	-0.904614	-1.12918	0	1
	0.746993	-0.90459	-1.12915	0	1
	0.747993	-0.904566	-1.12911	0	1
	0.748993	-0.904542	-1.12907	0	1
	0.749993	-0.904518	-1.12903	0	1
	0.750992	-0.904494	-1.129	0	1
	0.751992	-0.90447	-1.12896	0	1
	0.752992	-0.904446	-1.12893	0	1
	0.753992	-0.904422	-1.12889	0	1
	0.754992	-0.904398	-1.12886	0	1
	0.755992	-0.904374	-1.12883	0	1
	0.756992	-0.90435	-1.12879	0	1
	0.757992	-0.904325	-1.12876	0	1
	0.758992	-0.904301	-1.12873	0	1
	0.759992	-0.904277	-1.1287	0	1
	0.760992	-0.904253	-1.12867	0	1
	0.761992	-0.904229	-1.12864	0	1
	0.762992	-0.904205	-1.1286	0	1
	0.763992	-0.904181	-1.12857	0	1
	0.764992	-0.904157	-1.12854	0	1
	0.765992	-0.904133	-1.12852	0	1
	0.766992	-0.904109	-1.12849	0	1
	0.767992	-0.904085	-1.12846	0	1
	0.768992	-0.904061	-1.12843	0	1
	0.769992	-0.904037	-1.1284	0	1
	0.770992	-0.904013	-1.12837	0	1
	0.771992	-0.903989	-1.12834	0	1
	0.772992	-0.903965	-1.12832	0	1
	0.773992	-0.903941	-1.12829	0	1
	0.774992	-0.903917	-1.12826	0	1
	0.775992	-0.903893	-1.12823	0	1
	0.776992	-0.903869	-1.12821	0	1
	0.777992	-0.903845	-1.12818	0	1
	0.778992	-0.903821	-1.12815	0	1
	0.779992	-0.903797	-1.12812	0	1
	0.780992	-0.903773	-1.1281	0	1
	0.781992	-0.903749	-1.12807	0	1
	0.782992	-0.903725	-1.12804	0	1
	0.783992	-0.903701	-1.12802	0	1
	0.784992	-0.903677	-1.12799	0	1
	0.785992	-0.903653	-1.12796	0	1
	0.786992	-0.903629	-1.12793	0	1
	0.787992	-0.903605	-1.12791	0	1
	0.788992	-0.903581	-1.12788	0	1
	0.789992	-0.903557	-1.12785	0	1
	0.790992	-0.903533	-1.12782	0	1
	0.791992	-0.903509	-1.1278	0	1
	0.792992	-0.903485	-1.12777	0	1
	0.793992	-0.903461	-1.12774	0	1
	0.794992	-0.903437	-1.12771	0	1
	0.795992	-0.903413	-1.12768	0	1
	0.796992	-0.903389	-1.12765	0	1
	0.797992	-0.903364	-1.12762	0	1
	0.798992	-0.90334	-1.12759	0	1
	0.799992	-0.903316	-1.12756	0	1
	0.800992	-0.903292	-1.12753	0	1
	0.801992	-0.903268	-1.1275	0	1
	0.802992	-0.903244	-1.12747	0	1
	0.803992	-0.90322	-1.12744	0	1
	0.804992	-0.903196	-1.12741	0	1
	0.805992	-0.903172	-1.12737	0	1
	0.806992	-0.903148	-1.12734	0	1
	0.807992	-0.903124	-1.12731	0	1
	0.808992	-0.9031	-1.12727	0	1
	0.809992	-0.903076	-1.12724	0	1
	0.810992	-0.903052	-1.1272	0	1
	0.811992	-0.903028	-1.12717	0	1
	0.812992	-0.903004	-1.12713	0	1
	0.813992	-0.90298	-1.12709	0	1
	0.814992	-0.902956	-1.12706	0	1
	0.815992	-0.902932	-1.12702	0	1
	0.816992	-0.902908	-1.12698	0	1
	0.817992	-0.902884	-1.12694	0	1
	0.818992	-0.90286	-1.1269	0	1
	0.819992	-0.902836	-1.12686	0	1
	0.820992	-0.902812	-1.12682	0	1
	0.821992	-0.902788	-1.12678	0	1
	0.822992	-0.902764	-1.12674	0	1
	0.823992	-0.90274	-1.1267	0	1
	0.824992	-0.902716	-1.12666	0	1
	0.825992	-0.902692	-1.12661	0	1
	0.826992	-0.902668	-1.12657	0	1
	0.827992	-0.902644	-1.12653	0	1
	0.828992	-0.90262	-1.12648	0	1
	0.829992	-0.902596	-1.12644	0	1
	0.830992	-0.902572	-1.1264	0	1
	0.831992	-0.902548	-1.12635	0	1
	0.832992	-0.902524	-1.12631	0	1
	0.833992	-0.9025	-1.12626	0	1
	0.834992	-0.902476	-1.12622	0	1
	0.835992	-0.902452	-1.12617	0	1
	0.836992	-0.902427	-1.12613	0	1
	0.837992	-0.902403	-1.12608	0	1
	0.838992	-0.902379	-1.12603	0	1
	0.839992	-0.902355	-1.12599	0	1
	0.840992	-0.902331	-1.12594	0	1
	0.841992	-0.902307	-1.1259	0	1
	0.842992	-0.902283	-1.12585	0	1
	0.843992	-0.902259	-1.1258	0	1
	0.844992	-0.902235	-1.12576	0	1
	0.845992	-0.902211	-1.12571	0	1
	0.846992	-0.902187	-1.12567	0	1
	0.847992	-0.902163	-1.12562	0	1
	0.848992	-0.902139	-1.12557	0	1
	0.849992	-0.902115	-1.12553	0	1
	0.850991	-0.902091	-1.12548	0	1
	0.851991	-0.902067	-1.12544	0	1
	0.852991	-0.902043	-1.12539	0	1
	0.853991	-0.902019	-1.12535	0	1
	0.854991	-0.901995	-1.1253	0	1
	0.855991	-0.901971	-1.12526	0	1
	0.856991	-0.901947	-1.12521	0	1
	0.857991	-0.901923	-1.12517	0	1
	0.858991	-0.901899	-1.12512	0	1
	0.859991	-0.901875	-1.12508	0	1
	0.860991	-0.901851	-1.12504	0	1
	0.861991	-0.901827	-1.12499	0	1
	0.862991	-0.901803	-1.12495	0	1
	0.863991	-0.901779	-1.12491	0	1
	0.864991	-0.901755	-1.12486	0	1
	0.865991	-0.901731	-1.12482	0	1
	0.866991	-0.901707	-1.12478	0	1
	0.867991	-0.901683	-1.12474	0	1
	0.868991	-0.901659	-1.1247	0	1
	0.869991	-0.901635	-1.12466	0	1
	0.870991	-0.901611	-1.12462	0	1
	0.871991	-0.901587	-1.12458	0	1
	0.872991	-0.901563	-1.12454	0	1
	0.873991	-0.901539	-1.1245	0	1
	0.874991	-0.901515	-1.12447	0	1
	0.875991	-0.901491	-1.12443	0	1
	0.876991	-0.901466	-1.12439	0	1
	0.877991	-0.901442	-1.12436	0	1
	0.878991	-0.901418	-1.12432	0	1
	0.879991	-0.901394	-1.12429	0	1
	0.880991	-0.90137	-1.12425	0	1
	0.881991	-0.901346	-1.12422	0	1
	0.882991	-0.901322	-1.12419	0	1
	0.883991	-0.901298	-1.12416	0	1
	0.884991	-0.901274	-1.12412	0	1
	0.885991	-0.90125	-1.12409	0	1
	0.886991	-0.901226	-1.12406	0	1
	0.887991	-0.901202	-1.12403	0	1
	0.888991	-0.901178	-1.124	0	1
	0.889991	-0.901154	-1.12397	0	1
	0.890991	-0.90113	-1.12394	0	1
	0.891991	-0.901106	-1.12391	0	1
	0.892991	-0.901082	-1.12388	0	1
	0.893991	-0.901058	-1.12385	0	1
	0.894991	-0.901034	-1.12382	0	1
	0.895991	-0.90101	-1.12379	0	1
	0.896991	-0.900986	-1.12376	0	1
	0.897991	-0.900962	-1.12374	0	1
	0.898991	-0.900938	-1.12371	0	1
	0.899991	-0.900914	-1.12368	0	1
	0.900991	-0.90089	-1.12365	0	1
	0.901991	-0.900866	-1.12363	0	1
	0.902991	-0.900842	-1.1236	0	1
	0.903991	-0.900818	-1.12357	0	1
	0.904991	-0.900794	-1.12354	0	1
	0.905991	-0.90077	-1.12352	0	1
	0.906991	-0.900746	-1.12349	0	1
	0.907991	-0.900722	-1.12346	0	1
	0.908991	-0.900698	-1.12344	0	1
	0.909991	-0.900674	-1.12341	0	1
	0.910991	-0.90065	-1.12338	0	1
	0.911991	-0.900626	-1.12335	0	1
	0.912991	-0.900602	-1.12333	0	1
	0.913991	-0.900578	-1.1233	0	1
	0.914991	-0.900554	-1.12327	0	1
	0.915991	-0.900529	-1.12324	0	1
	0.916991	-0.900505	-1.12322	0	1
	0.917991	-0.900481	-1.12319	0	1
	0.918991	-0.900457	-1.12316	0	1
	0.919991	-0.900433	-1.12313	0	1
	0.920991	-0.900409	-1.1231	0	1
	0.921991	-0.900385	-1.12307	0	1
	0.922991	-0.900361	-1.12305	0	1
	0.923991	-0.900337	-1.12302	0	1
	0.924991	-0.900313	-1.12299	0	1
	0.925991	-0.900289	-1.12296	0	1
	0.926991	-0.900265	-1.12293	0	1
	0.927991	-0.900241	-1.12289	0	1
	0.928991	-0.900217	-1.12286	0	1
	0.929991	-0.900193	-1.12283	0	1
	0.930991	-0.900169	-1.1228	0	1
	0.931991	-0.900145	-1.12277	0	1
	0.932991	-0.900121	-1.12274	0	1
	0.933991	-0.900097	-1.1227	0	1
	0.934991	-0.900073	-1.12267	0	1
	0.935991	-0.900049	-1.12263	0	1
	0.936991	-0.900025	-1.1226	0	1
	0.937991	-0.900001	-1.12256	0	1
	0.938991	-0.899977	-1.12253	0	1
	0.939991	-0.899953	-1.12249	0	1
	0.940991	-0.899929	-1.12245	0	1
	0.941991	-0.899905	-1.12242	0	1
	0.942991	-0.899881	-1.12238	0	1
	0.943991	-0.899857	-1.12234	0	1
	0.944991	-0.899833	-1.1223	0	1
	0.945991	-0.899809	-1.12226	0	1
	0.946991	-0.899785	-1.12222	0	1
	0.947991	-0.899761	-1.12218	0	1
	0.948991	-0.899737	-1.12214	0	1
	0.949991	-0.899713	-1.1221	0	1
	0.95099	-0.899689	-1.12206	0	1
	0.95199	-0.899665	-1.12202	0	1
	0.95299	-0.899641	-1.12197	0	1
	0.95399	-0.899617	-1.12193	0	1
	0.95499	-0.899593	-1.12189	0	1
	0.95599	-0.899568	-1.12185	0	1
	0.95699	-0.899544	-1.1218	0	1
	0.95799	-0.89952	-1.12176	0	1
	0.95899	-0.899496	-1.12171	0	1
	0.95999	-0.899472	-1.12167	0	1
	0.96099	-0.899448	-1.12163	0	1
	0.96199	-0.899424	-1.12158	0	1
	0.96299	-0.8994	-1.12154	0	1
	0.96399	-0.899376	-1.12149	0	1
	0.96499	-0.899352	-1.12145	0	1
	0.96599	-0.899328	-1.1214	0	1
	0.96699	-0.899304	-1.12136	0	1
	0.96799	-0.89928	-1.12131	0	1
	0.96899	-0.899256	-1.12126	0	1
	0.96999	-0.899232	-1.12122	0	1
	0.97099	-0.899208	-1.12117	0	1
	0.97199	-0.899184	-1.12113	0	1
	0.97299	-0.89916	-1.12108	0	1
	0.97399	-0.899136	-1.12104	0	1
	0.97499	-0.899112	-1.12099	0	1
	0.97599	-0.899088	-1.12094	0	1
	0.97699	-0.899064	-1.1209	0	1
	0.97799	-0.89904	-1.12085	0	1
	0.97899	-0.899016	-1.12081	0	1
	0.97999	-0.898992	-1.12076	0	1
	0.98099	-0.898968	-1.12072	0	1
	0.98199	-0.898944	-1.12067	0	1
	0.98299	-0.89892	-1.12063	0	1
	0.98399	-0.898896	-1.12058	0	1
	0.98499	-0.898872	-1.12054	0	1
	0.98599	-0.898848	-1.12049	0	1
	0.98699	-0.898824	-1.12045	0	1
	0.98799	-0.8988	-1.12041	0	1
	0.98899	-0.898776	-1.12036	0	1
	0.98999	-0.898752	-1.12032	0	1
	0.99099	-0.898728	-1.12028	0	1
	0.99199	-0.898704	-1.12023	0	1
	0.99299	-0.89868	-1.12019	0	1
	0.99399	-0.898656	-1.12015	0	1
	0.99499	-0.898631	-1.12011	0	1
	0.99599	-0.898607	-1.12006	0	1
	0.99699	-0.898583	-1.12002	0	1
	0.99799	-0.898559	-1.11998	0	1
	0.99899	-0.898535	-1.11994	0	1
	0.99999	-0.898511	-1.1199	0	1
	1.00099	-0.898487	-1.11986	0	1
	1.00199	-0.898463	-1.11982	0	1
	1.00299	-0.898439	-1.11978	0	1
	1.00399	-0.898415	-1.11975	0	1
	1.00499	-0.898391	-1.11971	0	1
	1.00599	-0.898367	-1.11967	0	1
	1.00699	-0.898343	-1.11963	0	1
	1.00799	-0.898319	-1.1196	0	1
	1.00899	-0.898295	-1.11956	0	1
	1.00999	-0.898271	-1.11952	0	1
	1.01099	-0.898247	-1.11949	0	1
	1.01199	-0.898223	-1.11945	0	1
	1.01299	-0.898199	-1.11942	0	1
	1.01399	-0.898175	-1.11939	0	1
	1.01499	-0.898151	-1.11935	0	1
	1.01599	-0.898127	-1.11932	0	1
	1.01699	-0.898103	-1.11928	0	1
	1.01799	-0.898079	-1.11925	0	1
	1.01899	-0.898055	-1.11922	0	1
	1.01999	-0.898031	-1.11919	0	1
	1.02099	-0.898007	-1.11915	0	1
	1.02199	-0.897983	-1.11912	0	1
	1.02299	-0.897959	-1.11909	0	1
	1.02399	-0.897935	-1.11906	0	1
	1.02499	-0.897911	-1.11903	0	1
	1.02599	-0.897887	-1.119	0	1
	1.02699	-0.897863	-1.11897	0	1
	1.02799	-0.897839	-1.11894	0	1
	1.02899	-0.897815	-1.11891	0	1
	1.02999	-0.897791	-1.11888	0	1
	1.03099	-0.897767	-1.11885	0	1
	1.03199	-0.897743	-1.11882	0	1
	1.03299	-0.897719	-1.11879	0	1
	1.03399	-0.897694	-1.11876	0	1
	1.03499	-0.89767	-1.11873	0	1
	1.03599	-0.897646	-1.11871	0	1
	1.03699	-0.897622	-1.11868	0	1
	1.03799	-0.897598	-1.11865	0	1
	1.03899	-0.897574	-1.11862	0	1
	1.03999	-0.89755	-1.1186	0	1
	1.04099	-0.897526	-1.11857	0	1
	1.04199	-0.897502	-1.11854	0	1
	1.04299	-0.897478	-1.11851	0	1
	1.04399	-0.897454	-1.11849	0	1
	1.04499	-0.89743	-1.11846	0	1
	1.04599	-0.897406	-1.11843	0	1
	1.04699	-0.897382	-1.11841	0	1
	1.04799	-0.897358	-1.11838	0	1
	1.04899	-0.897334	-1.11835	0	1
	1.04999	-0.89731	-1.11833	0	1
	1.05099	-0.897286	-1.1183	0	1
	1.05199	-0.897262	-1.11828	0	1
	1.05299	-0.897238	-1.11825	0	1
	1.05399	-0.897214	-1.11822	0	1
	1.05499	-0.89719	-1.1182	0	1
	1.05599	-0.897166	-1.11817	0	1
	1.05699	-0.897142	-1.11815	0	1
	1.05799	-0.897118	-1.11812	0	1
	1.05899	-0.897094	-1.1181	0	1
	1.05999	-0.89707	-1.11807	0	1
	1.06099	-0.897046	-1.11805	0	1
	1.06199	-0.897022	-1.11802	0	1
	1.06299	-0.896998	-1.11799	0	1
	1.06399	-0.896974	-1.11797	0	1
	1.06499	-0.89695	-1.11794	0	1
	1.06599	-0.896926	-1.11792	0	1
	1.06699	-0.896902	-1.11789	0	1
	1.06799	-0.896878	-1.11787	0	1
	1.06899	-0.896854	-1.11784	0	1
	1.06999	-0.89683	-1.11782	0	1
	1.07099	-0.896806	-1.11779	0	1
	1.07199	-0.896782	-1.11776	0	1
	1.07299	-0.896758	-1.11774	0	1
	1.07399	-0.896733	-1.11771	0	1
	1.07499	-0.896709	-1.11769	0	1
	1.07599	-0.896685	-1.11766	0	1
	1.07699	-0.896661	-1.11763	0	1
	1.07799	-0.896637	-1.11761	0	1
	1.07899	-0.896613	-1.11758	0	1
	1.07999	-0.896589	-1.11756	0	1
	1.08099	-0.896565	-1.11753	0	1
	1.08199	-0.896541	-1.1175	0	1
	1.08299	-0.896517	-1.11748	0	1
	1.08399	-0.896493	-1.11745	0	1
	1.08499	-0.896469	-1.11742	0	1
	1.08599	-0.896445	-1.11739	0	1
	1.08699	-0.896421	-1.11737	0	1
	1.08799	-0.896397	-1.11734	0	1
	1.08899	-0.896373	-1.11731	0	1
	1.08999	-0.896349	-1.11728	0	1
	1.09099	-0.896325	-1.11725	0	1
	1.09199	-0.896301	-1.11723	0	1
	1.09299	-0.896277	-1.1172	0	1
	1.09399	-0.896253	-1.11717	0	1
	1.09499	-0.896229	-1.11714	0	1
	1.09599	-0.896205	-1.11711	0	1
	1.09699	-0.896181	-1.11708	0	1
	1.09799	-0.896157	-1.11705	0	1
	1.09899	-0.896133	-1.11702	0	1
	1.09999	-0.896109	-1.11699	0	1
	1.10099	-0.896085	-1.11696	0	1
	1.10199	-0.896061	-1.11693	0	1
	1.10299	-0.896037	-1.1169	0	1
	1.10399	-0.896013	-1.11687	0	1
	1.10499	-0.895989	-1.11684	0	1
	1.10599	-0.895965	-1.1168	0	1
	1.10699	-0.895941	-1.11677	0	1
	1.10799	-0.895917	-1.11674	0	1
	1.10899	-0.895893	-1.11671	0	1
	1.10999	-0.895869	-1.11667	0	1
	1.11099	-0.895845	-1.11664	0	1
	1.11199	-0.895821	-1.11661	0	1
	1.11299	-0.895796	-1.11657	0	1
	1.11399	-0.895772	-1.11654	0	1
	1.11499	-0.895748	-1.1165	0	1
	1.11599	-0.895724	-1.11647	0	1
	1.11699	-0.8957	-1.11643	0	1
	1.11799	-0.895676	-1.11639	0	1
	1.11899	-0.895652	-1.11636	0	1
	1.11999	-0.895628	-1.11632	0	1
	1.12099	-0.895604	-1.11628	0	1
	1.12199	-0.89558	-1.11625	0	1
	1.12299	-0.895556	-1.11621	0	1
	1.12399	-0.895532	-1.11617	0	1
	1.12499	-0.895508	-1.11613	0	1
	1.12599	-0.895484	-1.11609	0	1
	1.12699	-0.89546	-1.11605	0	1
	1.12799	-0.895436	-1.11601	0	1
	1.12899	-0.895412	-1.11597	0	1
	1.12999	-0.895388	-1.11593	0	1
	1.13099	-0.895364	-1.11589	0	1
	1.13199	-0.89534	-1.11585	0	1
	1.13299	-0.895316	-1.1158	0	1
	1.13399	-0.895292	-1.11576	0	1
	1.13499	-0.895268	-1.11572	0	1
	1.13599	-0.895244	-1.11568	0	1
	1.13699	-0.89522	-1.11563	0	1
	1.13799	-0.895196	-1.11559	0	1
	1.13899	-0.895172	-1.11555	0	1
	1.13999	-0.895148	-1.1155	0	1
	1.14099	-0.895124	-1.11546	0	1
	1.14199	-0.8951	-1.11541	0	1
	1.14299	-0.895076	-1.11537	0	1
	1.14399	-0.895052	-1.11532	0	1
	1.14499	-0.895028	-1.11528	0	1
	1.14599	-0.895004	-1.11523	0	1
	1.14699	-0.89498	-1.11519	0	1
	1.14799	-0.894956	-1.11514	0	1
	1.14899	-0.894932	-1.1151	0	1
	1.14999	-0.894908	-1.11505	0	1
	1.15099	-0.894884	-1.11501	0	1
	1.15199	-0.89486	-1.11496	0	1
	1.15299	-0.894835	-1.11491	0	1
	1.15399	-0.894811	-1.11487	0	1
	1.15499	-0.894787	-1.11482	0	1
	1.15599	-0.894763	-1.11478	0	1
	1.15699	-0.894739	-1.11473	0	1
	1.15799	-0.894715	-1.11469	0	1
	1.15899	-0.894691	-1.11464	0	1
	1.15999	-0.894667	-1.1146	0	1
	1.16099	-0.894643	-1.11455	0	1
	1.16199	-0.894619	-1.11451	0	1
	1.16299	-0.894595	-1.11446	0	1
	1.16399	-0.894571	-1.11442	0	1
	1.16499	-0.894547	-1.11437	0	1
	1.16599	-0.894523	-1.11433	0	1
	1.16699	-0.894499	-1.11428	0	1
	1.16799	-0.894475	-1.11424	0	1
	1.16899	-0.894451	-1.11419	0	1
	1.16999	-0.894427	-1.11415	0	1
	1.17099	-0.894403	-1.11411	0	1
	1.17199	-0.894379	-1.11406	0	1
	1.17299	-0.894355	-1.11402	0	1
	1.17399	-0.894331	-1.11398	0	1
	1.17499	-0.894307	-1.11394	0	1
	1.17599	-0.894283	-1.1139	0	1
	1.17699	-0.894259	-1.11385	0	1
	1.17799	-0.894235	-1.11381	0	1
	1.17899	-0.894211	-1.11377	0	1
	1.17999	-0.894187	-1.11373	0	1
	1.18099	-0.894163	-1.11369	0	1
	1.18199	-0.894139	-1.11365	0	1
	1.18299	-0.894115	-1.11361	0	1
	1.18399	-0.894091	-1.11358	0	1
	1.18499	-0.894067	-1.11354	0	1
	1.18599	-0.894043	-1.1135	0	1
	1.18699	-0.894019	-1.11346	0	1
	1.18799	-0.893995	-1.11343	0	1
	1.18899	-0.893971	-1.11339	0	1
	1.18999	-0.893947	-1.11336	0	1
	1.19099	-0.893923	-1.11332	0	1
	1.19199	-0.893899	-1.11329	0	1
	1.19299	-0.893874	-1.11325	0	1
	1.19399	-0.89385	-1.11322	0	1
	1.19499	-0.893826	-1.11319	0	1
	1.19599	-0.893802	-1.11316	0	1
	1.19699	-0.893778	-1.11312	0	1
	1.19799	-0.893754	-1.11309	0	1
	1.19899	-0.89373	-1.11306	0	1
	1.19999	-0.893706	-1.11303	0	1
	1.20099	-0.893682	-1.113	0	1
	1.20199	-0.893658	-1.11297	0	1
	1.20299	-0.893634	-1.11294	0	1
	1.20399	-0.89361	-1.11291	0	1
	1.20499	-0.893586	-1.11288	0	1
	1.20599	-0.893562	-1.11285	0	1
	1.20699	-0.893538	-1.11282	0	1
	1.20799	-0.893514	-1.1128	0	1
	1.20899	-0.89349	-1.11277	0	1
	1.20999	-0.893466	-1.11274	0	1
	1.21099	-0.893442	-1.11271	0	1
	1.21199	-0.893418	-1.11268	0	1
	1.21299	-0.893394	-1.11266	0	1
	1.21399	-0.89337	-1.11263	0	1
	1.21499	-0.893346	-1.1126	0	1
	1.21599	-0.893322	-1.11257	0	1
	1.21699	-0.893298	-1.11255	0	1
	1.21799	-0.893274	-1.11252	0	1
	1.21899	-0.89325	-1.11249	0	1
	1.21999	-0.893226	-1.11247	0	1
	1.22099	-0.893202	-1.11244	0	1
	1.22199	-0.893178	-1.11241	0	1
	1.22299	-0.893154	-1.11238	0	1
	1.22399	-0.89313	-1.11236	0	1
	1.22499	-0.893106	-1.11233	0	1
	1.22599	-0.893082	-1.1123	0	1
	1.22699	-0.893058	-1.11227	0	1
	1.22799	-0.893034	-1.11225	0	1
	1.22899	-0.89301	-1.11222	0	1
	1.22999	-0.892986	-1.11219	0	1
	1.23099	-0.892962	-1.11216	0	1
	1.23199	-0.892938	-1.11213	0	1
	1.23299	-0.892913	-1.1121	0	1
	1.23399	-0.892889	-1.11207	0	1
	1.23499	-0.892865	-1.11204	0	1
	1.23599	-0.892841	-1.11202	0	1
	1.23699	-0.892817	-1.11199	0	1
	1.23799	-0.892793	-1.11196	0	1
	1.23899	-0.892769	-1.11192	0	1
	1.23999	-0.892745	-1.11189	0	1
	1.24099	-0.892721	-1.11186	0	1
	1.24199	-0.892697	-1.11183	0	1
	1.24299	-0.892673	-1.1118	0	1
	1.24399	-0.892649	-1.11177	0	1
	1.24499	-0.892625	-1.11173	0	1
	1.24599	-0.892601	-1.1117	0	1
	1.24699	-0.892577	-1.11167	0	1
	1.24799	-0.892553	-1.11163	0	1
	1.24899	-0.892529	-1.1116	0	1
	1.24999	-0.892505	-1.11156	0	1
	1.25099	-0.892481	-1.11153	0	1
	1.25199	-0.892457	-1.11149	0	1
	1.25299	-0.892433	-1.11145	0	1
	1.25399	-0.892409	-1.11141	0	1
	1.25499	-0.892385	-1.11138	0	1
	1.25599	-0.892361	-1.11134	0	1
	1.25699	-0.892337	-1.1113	0	1
	1.25799	-0.892313	-1.11126	0	1
	1.25899	-0.892289	-1.11122	0	1
	1.25999	-0.892265	-1.11118	0	1
	1.26099	-0.892241	-1.11114	0	1
	1.26199	-0.892217	-1.1111	0	1
	1.26299	-0.892193	-1.11106	0	1
	1.26399	-0.892169	-1.11101	0	1
	1.26499	-0.892145	-1.11097	0	1
	1.26599	-0.892121	-1.11093	0	1
	1.26699	-0.892097	-1.11089	0	1
	1.26799	-0.892072	-1.11084	0	1
	1.26899	-0.892048	-1.1108	0	1
	1.26999	-0.892024	-1.11076	0	1
	1.27099	-0.892	-1.11071	0	1
	1.27199	-0.891976	-1.11067	0	1
	1.27299	-0.891952	-1.11062	0	1
	1.27399	-0.891928	-1.11058	0	1
	1.27499	-0.891904	-1.11053	0	1
	1.27599	-0.89188	-1.11049	0	1
	1.27699	-0.891856	-1.11044	0	1
	1.27799	-0.891832	-1.1104	0	1
	1.27899	-0.891808	-1.11035	0	1
	1.27999	-0.891784	-1.11031	0	1
	1.28099	-0.89176	-1.11026	0	1
	1.28199	-0.891736	-1.11022	0	1
	1.28299	-0.891712	-1.11017	0	1
	1.28399	-0.891688	-1.11013	0	1
	1.28499	-0.891664	-1.11008	0	1
	1.28599	-0.89164	-1.11004	0	1
	1.28699	-0.891616	-1.10999	0	1
	1.28799	-0.891592	-1.10994	0	1
	1.28899	-0.891568	-1.1099	0	1
	1.28999	-0.891544	-1.10985	0	1
	1.29099	-0.89152	-1.10981	0	1
	1.29199	-0.891496	-1.10976	0	1
	1.29299	-0.891472	-1.10972	0	1
	1.29399	-0.891448	-1.10967	0	1
	1.29499	-0.891424	-1.10963	0	1
	1.29599	-0.8914	-1.10958	0	1
	1.29699	-0.891376	-1.10954	0	1
	1.29799	-0.891352	-1.10949	0	1
	1.29899	-0.891328	-1.10945	0	1
	1.29999	-0.891304	-1.1094	0	1
	1.30099	-0.89128	-1.10936	0	1
	1.30199	-0.891256	-1.10932	0	1
	1.30299	-0.891232	-1.10927	0	1
	1.30399	-0.891208	-1.10923	0	1
	1.30499	-0.891184	-1.10919	0	1
	1.30599	-0.89116	-1.10915	0	1
	1.30699	-0.891136	-1.1091	0	1
	1.30799	-0.891112	-1.10906	0	1
	1.30899	-0.891087	-1.10902	0	1
	1.30999	-0.891063	-1.10898	0	1
	1.31099	-0.891039	-1.10894	0	1
	1.31199	-0.891015	-1.1089	0	1
	1.31299	-0.890991	-1.10886	0	1
	1.31399	-0.890967	-1.10882	0	1
	1.31499	-0.890943	-1.10878	0	1
	1.31599	-0.890919	-1.10874	0	1
	1.31699	-0.890895	-1.10871	0	1
	1.31799	-0.890871	-1.10867	0	1
	1.31899	-0.890847	-1.10863	0	1
	1.31999	-0.890823	-1.10859	0	1
	1.32099	-0.890799	-1.10856	0	1
	1.32199	-0.890775	-1.10852	0	1
	1.32299	-0.890751	-1.10849	0	1
	1.32399	-0.890727	-1.10845	0	1
	1.32499	-0.890703	-1.10842	0	1
	1.32599	-0.890679	-1.10838	0	1
	1.32699	-0.890655	-1.10835	0	1
	1.32799	-0.890631	-1.10832	0	1
	1.32899	-0.890607	-1.10828	0	1
	1.32999	-0.890583	-1.10825	0	1
	1.33099	-0.890559	-1.10822	0	1
	1.33199	-0.890535	-1.10818	0	1
	1.33299	-0.890511	-1.10815	0	1
	1.33399	-0.890487	-1.10812	0	1
	1.33499	-0.890463	-1.10809	0	1
	1.33599	-0.890439	-1.10806	0	1
	1.33699	-0.890415	-1.10803	0	1
	1.33799	-0.890391	-1.108	0	1
	1.33899	-0.890367	-1.10797	0	1
	1.33999	-0.890343	-1.10793	0	1
	1.34099	-0.890319	-1.10791	0	1
	1.34199	-0.890295	-1.10788	0	1
	1.34299	-0.890271	-1.10785	0	1
	1.34399	-0.890247	-1.10782	0	1
	1.34499	-0.890223	-1.10779	0	1
	1.34599	-0.890199	-1.10776	0	1
	1.34699	-0.890175	-1.10773	0	1
	1.34799	-0.890151	-1.1077	0	1
	1.34899	-0.890127	-1.10767	0	1
	1.34999	-0.890103	-1.10765	0	1
	1.35099	-0.890079	-1.10762	0	1
	1.35199	-0.890055	-1.10759	0	1
	1.35299	-0.890031	-1.10756	0	1
	1.35399	-0.890007	-1.10754	0	1
	1.35499	-0.889983	-1.10751	0	1
	1.35599	-0.889959	-1.10748	0	1
	1.35699	-0.889935	-1.10746	0	1
	1.35799	-0.889911	-1.10743	0	1
	1.35899	-0.889887	-1.1074	0	1
	1.35999	-0.889863	-1.10738	0	1
	1.36099	-0.889839	-1.10735	0	1
	1.36199	-0.889815	-1.10732	0	1
	1.36299	-0.889791	-1.1073	0	1
	1.36399	-0.889767	-1.10727	0	1
	1.36499	-0.889742	-1.10725	0	1
	1.36599	-0.889718	-1.10722	0	1
	1.36699	-0.889694	-1.10719	0	1
	1.36799	-0.88967	-1.10717	0	1
	1.36899	-0.889646	-1.10714	0	1
	1.36999	-0.889622	-1.10712	0	1
	1.37099	-0.889598	-1.10709	0	1
	1.37199	-0.889574	-1.10707	0	1
	1.37299	-0.88955	-1.10704	0	1
	1.37399	-0.889526	-1.10701	0	1
	1.37499	-0.889502	-1.10699	0	1
	1.37599	-0.889478	-1.10696	0	1
	1.37699	-0.889454	-1.10694	0	1
	1.37799	-0.88943	-1.10691	0	1
	1.37899	-0.889406	-1.10689	0	1
	1.37999	-0.889381	-1.10686	0	1
	1.38099	-0.889357	-1.10684	0	1
	1.38199	-0.889333	-1.10681	0	1
	1.38299	-0.889309	-1.10678	0	1
	1.38399	-0.889285	-1.10676	0	1
	1.38499	-0.889261	-1.10673	0	1
	1.38599	-0.889237	-1.10671	0	1
	1.38699	-0.889213	-1.10668	0	1
	1.38799	-0.889189	-1.10666	0	1
	1.38899	-0.889165	-1.10663	0	1
	1.38999	-0.889141	-1.1066	0	1
	1.39099	-0.889117	-1.10658	0	1
	1.39199	-0.889092	-1.10655	0	1
	1.39299	-0.889068	-1.10652	0	1
	1.39399	-0.889044	-1.1065	0	1
	1.39499	-0.88902	-1.10647	0	1
	1.39599	-0.888996	-1.10644	0	1
	1.39699	-0.888972	-1.10642	0	1
	1.39799	-0.888948	-1.10639	0	1
	1.39899	-0.888924	-1.10636	0	1
	1.39999	-0.8889	-1.10633	0	1
	1.40099	-0.888876	-1.10631	0	1
	1.40199	-0.888852	-1.10628	0	1
	1.40299	-0.888828	-1.10625	0	1
	1.40399	-0.888803	-1.10622	0	1
	1.40499	-0.888779	-1.10619	0	1
	1.40599	-0.888755	-1.10616	0	1
	1.40699	-0.888731	-1.10614	0	1
	1.40799	-0.888707	-1.10611	0	1
	1.40899	-0.888683	-1.10608	0	1
	1.40999	-0.888659	-1.10605	0	1
	1.41099	-0.888635	-1.10602	0	1
	1.41199	-0.888611	-1.10599	0	1
	1.41299	-0.888587	-1.10596	0	1
	1.41399	-0.888563	-1.10593	0	1
	1.41499	-0.888539	-1.1059	0	1
	1.41599	-0.888515	-1.10586	0	1
	1.41699	-0.888491	-1.10583	0	1
	1.41799	-0.888467	-1.1058	0	1
	1.41899	-0.888443	-1.10577	0	1
	1.41999	-0.888419	-1.10574	0	1
	1.42099	-0.888395	-1.1057	0	1
	1.42199	-0.888371	-1.10567	0	1
	1.42299	-0.888347	-1.10564	0	1
	1.42399	-0.888323	-1.1056	0	1
	1.42499	-0.888299	-1.10557	0	1
	1.42599	-0.888275	-1.10553	0	1
	1.42699	-0.888251	-1.1055	0	1
	1.42799	-0.888227	-1.10546	0	1
	1.42899	-0.888203	-1.10543	0	1
	1.42999	-0.888179	-1.10539	0	1
	1.43099	-0.888155	-1.10536	0	1
	1.43199	-0.888132	-1.10532	0	1
	1.43299	-0.888108	-1.10528	0	1
	1.43399	-0.888084	-1.10525	0	1
	1.43499	-0.88806	-1.10521	0	1
	1.43599	-0.888036	-1.10517	0	1
	1.43699	-0.888012	-1.10513	0	1
	1.43799	-0.887988	-1.10509	0	1
	1.43899	-0.887965	-1.10505	0	1
	1.43999	-0.887941	-1.10501	0	1
	1.44099	-0.887917	-1.10497	0	1
	1.44199	-0.887893	-1.10493	0	1
	1.44299	-0.887869	-1.10489	0	1
	1.44399	-0.887845	-1.10485	0	1
	1.44499	-0.887822	-1.1048	0	1
	1.44599	-0.887798	-1.10476	0	1
	1.44699	-0.887774	-1.10472	0	1
	1.44799	-0.88775	-1.10468	0	1
	1.44899	-0.887726	-1.10463	0	1
	1.44999	-0.887703	-1.10459	0	1
	1.45099	-0.887679	-1.10455	0	1
	1.45199	-0.887655	-1.1045	0	1
	1.45299	-0.887631	-1.10446	0	1
	1.45399	-0.887608	-1.10441	0	1
	1.45499	-0.887584	-1.10437	0	1
	1.45599	-0.88756	-1.10432	0	1
	1.45699	-0.887536	-1.10428	0	1
	1.45799	-0.887512	-1.10423	0	1
	1.45899	-0.887489	-1.10419	0	1
	1.45999	-0.887465	-1.10414	0	1
	1.46099	-0.887441	-1.1041	0	1
	1.46199	-0.887417	-1.10405	0	1
	1.46299	-0.887393	-1.10401	0	1
	1.46399	-0.887369	-1.10396	0	1
	1.46499	-0.887346	-1.10391	0	1
	1.46599	-0.887322	-1.10387	0	1
	1.46699	-0.887298	-1.10382	0	1
	1.46799	-0.887274	-1.10378	0	1
	1.46899	-0.88725	-1.10373	0	1
	1.46999	-0.887226	-1.10369	0	1
	1.47099	-0.887202	-1.10364	0	1
	1.47199	-0.887178	-1.1036	0	1
	1.47299	-0.887154	-1.10355	0	1
	1.47399	-0.88713	-1.10351	0	1
	1.47499	-0.887106	-1.10346	0	1
	1.47599	-0.887082	-1.10342	0	1
	1.47699	-0.887058	-1.10337	0	1
	1.47799	-0.887034	-1.10333	0	1
	1.47899	-0.88701	-1.10328	0	1
	1.47999	-0.886986	-1.10324	0	1
	1.48099	-0.886962	-1.10319	0	1
	1.48199	-0.886938	-1.10315	0	1
	1.48299	-0.886914	-1.10311	0	1
	1.48399	-0.88689	-1.10306	0	1
	1.48499	-0.886865	-1.10302	0	1
	1.48599	-0.886841	-1.10298	0	1
	1.48699	-0.886817	-1.10294	0	1
	1.48799	-0.886793	-1.10289	0	1
	1.48899	-0.886768	-1.10285	0	1
	1.48999	-0.886744	-1.10281	0	1
	1.49099	-0.88672	-1.10277	0	1
	1.49199	-0.886695	-1.10273	0	1
	1.49299	-0.886671	-1.10269	0	1
	1.49399	-0.886646	-1.10265	0	1
	1.49499	-0.886622	-1.10261	0	1
	1.49599	-0.886597	-1.10257	0	1
	1.49699	-0.886573	-1.10254	0	1
	1.49799	-0.886548	-1.1025	0	1
	1.49899	-0.886523	-1.10246	0	1
	1.49999	-0.886499	-1.10243	0	1
	1.50098	-0.886474	-1.10239	0	1
	1.50198	-0.886449	-1.10236	0	1
	1.50298	-0.886424	-1.10232	0	1
	1.50398	-0.8864	-1.10229	0	1
	1.50498	-0.886375	-1.10225	0	1
	1.50598	-0.88635	-1.10222	0	1
	1.50698	-0.886325	-1.10219	0	1
	1.50798	-0.8863	-1.10215	0	1
	1.50898	-0.886275	-1.10212	0	1
	1.50998	-0.88625	-1.10209	0	1
	1.51098	-0.886225	-1.10206	0	1
	1.51198	-0.8862	-1.10203	0	1
	1.51298	-0.886175	-1.102	0	1
	1.51398	-0.88615	-1.10197	0	1
	1.51498	-0.886126	-1.10194	0	1
	1.51598	-0.886101	-1.10191	0	1
	1.51698	-0.886076	-1.10188	0	1
	1.51798	-0.886051	-1.10185	0	1
	1.51898	-0.886026	-1.10182	0	1
	1.51998	-0.886001	-1.10179	0	1
	1.52098	-0.885976	-1.10176	0	1
	1.52198	-0.885951	-1.10174	0	1
	1.52298	-0.885926	-1.10171	0	1
	1.52398	-0.885901	-1.10168	0	1
	1.52498	-0.885877	-1.10165	0	1
	1.52598	-0.885852	-1.10163	0	1
	1.52698	-0.885827	-1.1016	0	1
	1.52798	-0.885803	-1.10157	0	1
	1.52898	-0.885778	-1.10154	0	1
	1.52998	-0.885753	-1.10152	0	1
	1.53098	-0.885729	-1.10149	0	1
	1.53198	-0.885704	-1.10146	0	1
	1.53298	-0.88568	-1.10143	0	1
	1.53398	-0.885656	-1.10141	0	1
	1.53498	-0.885631	-1.10138	0	1
	1.53598	-0.885607	-1.10135	0	1
	1.53698	-0.885583	-1.10133	0	1
	1.53798	-0.885559	-1.1013	0	1
	1.53898	-0.885535	-1.10127	0	1
	1.53998	-0.885511	-1.10124	0	1
	1.54098	-0.885487	-1.10121	0	1
	1.54198	-0.885463	-1.10119	0	1
	1.54298	-0.885439	-1.10116	0	1
	1.54398	-0.885416	-1.10113	0	1
	1.54498	-0.885392	-1.1011	0	1
	1.54598	-0.885369	-1.10107	0	1
	1.54698	-0.885345	-1.10104	0	1
	1.54798	-0.885322	-1.10101	0	1
	1.54898	-0.885299	-1.10098	0	1
	1.54998	-0.885276	-1.10095	0	1
	1.55098	-0.885253	-1.10092	0	1
	1.55198	-0.88523	-1.10089	0	1
	1.55298	-0.885207	-1.10086	0	1
	1.55398	-0.885185	-1.10083	0	1
	1.55498	-0.885162	-1.1008	0	1
	1.55598	-0.88514	-1.10076	0	1
	1.55698	-0.885117	-1.10073	0	1
	1.55798	-0.885095	-1.1007	0	1
	1.55898	-0.885073	-1.10066	0	1
	1.55998	-0.885051	-1.10063	0	1
	1.56098	-0.88503	-1.10059	0	1
	1.56198	-0.885008	-1.10056	0	1
	1.56298	-0.884987	-1.10052	0	1
	1.56398	-0.884965	-1.10049	0	1
	1.56498	-0.884944	-1.10045	0	1
	1.56598	-0.884923	-1.10041	0	1
	1.56698	-0.884902	-1.10037	0	1
	1.56798	-0.884881	-1.10034	0	1
	1.56898	-0.88486	-1.1003	0	1
	1.56998	-0.88484	-1.10026	0	1
	1.57098	-0.884819	-1.10022	0	1
	1.57198	-0.884798	-1.10018	0	1
	1.57298	-0.884778	-1.10014	0	1
	1.57398	-0.884757	-1.10009	0	1
	1.57498	-0.884737	-1.10005	0	1
	1.57598	-0.884716	-1.10001	0	1
	1.57698	-0.884696	-1.09997	0	1
	1.57798	-0.884675	-1.09993	0	1
	1.57898	-0.884655	-1.09988	0	1
	1.57998	-0.884634	-1.09984	0	1
	1.58098	-0.884614	-1.0998	0	1
	1.58198	-0.884593	-1.09975	0	1
	1.58298	-0.884572	-1.09971	0	1
	1.58398	-0.884551	-1.09966	0	1
	1.58498	-0.884531	-1.09962	0	1
	1.58598	-0.88451	-1.09958	0	1
	1.58698	-0.884488	-1.09953	0	1
	1.58798	-0.884467	-1.09949	0	1
	1.58898	-0.884446	-1.09944	0	1
	1.58998	-0.884424	-1.09939	0	1
	1.59098	-0.884403	-1.09935	0	1
	1.59198	-0.884381	-1.0993	0	1
	1.59298	-0.884359	-1.09926	0	1
	1.59398	-0.884336	-1.09921	0	1
	1.59498	-0.884314	-1.09917	0	1
	1.59598	-0.884291	-1.09912	0	1
	1.59698	-0.884269	-1.09908	0	1
	1.59798	-0.884246	-1.09903	0	1
	1.59898	-0.884222	-1.09898	0	1
	1.59998	-0.884199	-1.09894	0	1
	1.60098	-0.884175	-1.09889	0	1
	1.60198	-0.884151	-1.09885	0	1
	1.60298	-0.884126	-1.0988	0	1
	1.60398	-0.884102	-1.09876	0	1
	1.60498	-0.884077	-1.09871	0	1
	1.60598	-0.884051	-1.09867	0	1
	1.60698	-0.884026	-1.09862	0	1
	1.60798	-0.883999	-1.09858	0	1
	1.60898	-0.883973	-1.09853	0	1
	1.60998	-0.883946	-1.09849	0	1
	1.61098	-0.883919	-1.09844	0	1
	1.61198	-0.883892	-1.0984	0	1
	1.61298	-0.883864	-1.09836	0	1
	1.61398	-0.883836	-1.09831	0	1
	1.61498	-0.883807	-1.09827	0	1
	1.61598	-0.883778	-1.09823	0	1
	1.61698	-0.883748	-1.09818	0	1
	1.61798	-0.883718	-1.09814	0	1
	1.61898	-0.883688	-1.0981	0	1
	1.61998	-0.883657	-1.09806	0	1
	1.62098	-0.883625	-1.09802	0	1
	1.62198	-0.883593	-1.09798	0	1
	1.62298	-0.883561	-1.09794	0	1
	1.62398	-0.883528	-1.0979	0	1
	1.62498	-0.883494	-1.09786	0	1
	1.62598	-0.88346	-1.09782	0	1
	1.62698	-0.883425	-1.09778	0	1
	1.62798	-0.88339	-1.09774	0	1
	1.62898	-0.883355	-1.09771	0	1
	1.62998	-0.883319	-1.09767	0	1
	1.63098	-0.883282	-1.09763	0	1
	1.63198	-0.883245	-1.0976	0	1
	1.63298	-0.883208	-1.09756	0	1
	1.63398	-0.88317	-1.09753	0	1
	1.63498	-0.883132	-1.09749	0	1
	1.63598	-0.883094	-1.09746	0	1
	1.63698	-0.883055	-1.09742	0	1
	1.63798	-0.883016	-1.09739	0	1
	1.63898	-0.882976	-1.09736	0	1
	1.63998	-0.882937	-1.09732	0	1
	1.64098	-0.882897	-1.09729	0	1
	1.64198	-0.882857	-1.09726	0	1
	1.64298	-0.882816	-1.09723	0	1
	1.64398	-0.882776	-1.09719	0	1
	1.64498	-0.882735	-1.09716	0	1
	1.64598	-0.882694	-1.09713	0	1
	1.64698	-0.882653	-1.0971	0	1
	1.64798	-0.882612	-1.09707	0	1
	1.64898	-0.882571	-1.09704	0	1
	1.64998	-0.88253	-1.09701	0	1
	1.65098	-0.882489	-1.09698	0	1
	1.65198	-0.882447	-1.09695	0	1
	1.65298	-0.882406	-1.09692	0	1
	1.65398	-0.882365	-1.09689	0	1
	1.65498	-0.882324	-1.09686	0	1
	1.65598	-0.882282	-1.09683	0	1
	1.65698	-0.882241	-1.0968	0	1
	1.65798	-0.8822	-1.09678	0	1
	1.65898	-0.882159	-1.09675	0	1
	1.65998	-0.882118	-1.09672	0	1
	1.66098	-0.882078	-1.09669	0	1
	1.66198	-0.882037	-1.09666	0	1
	1.66298	-0.881997	-1.09664	0	1
	1.66398	-0.881957	-1.09661	0	1
	1.66498	-0.881917	-1.09658	0	1
	1.66598	-0.881878	-1.09655	0	1
	1.66698	-0.881838	-1.09653	0	1
	1.66798	-0.881799	-1.0965	0	1
	1.66898	-0.881761	-1.09647	0	1
	1.66998	-0.881722	-1.09645	0	1
	1.67098	-0.881684	-1.09642	0	1
	1.67198	-0.881647	-1.09639	0	1
	1.67298	-0.881609	-1.09636	0	1
	1.67398	-0.881573	-1.09634	0	1
	1.67498	-0.881536	-1.09631	0	1
	1.67598	-0.8815	-1.09628	0	1
	1.67698	-0.881465	-1.09626	0	1
	1.67798	-0.88143	-1.09623	0	1
	1.67898	-0.881396	-1.0962	0	1
	1.67998	-0.881362	-1.09618	0	1
	1.68098	-0.881328	-1.09615	0	1
	1.68198	-0.881295	-1.09612	0	1
	1.68298	-0.881263	-1.09609	0	1
	1.68398	-0.881232	-1.09607	0	1
	1.68498	-0.881201	-1.09604	0	1
	1.68598	-0.881171	-1.09601	0	1
	1.68698	-0.881141	-1.09599	0	1
	1.68798	-0.881112	-1.09596	0	1
	1.68898	-0.881084	-1.09593	0	1
	1.68998	-0.881056	-1.0959	0	1
	1.69098	-0.881029	-1.09587	0	1
	1.69198	-0.881003	-1.09585	0	1
	1.69298	-0.880978	-1.09582	0	1
	1.69398	-0.880953	-1.09579	0	1
	1.69498	-0.880929	-1.09576	0	1
	1.69598	-0.880906	-1.09573	0	1
	1.69698	-0.880883	-1.0957	0	1
	1.69798	-0.880861	-1.09568	0	1
	1.69898	-0.880839	-1.09565	0	1
	1.69998	-0.880818	-1.09562	0	1
	1.70098	-0.880798	-1.09559	0	1
	1.70198	-0.880778	-1.09556	0	1
	1.70298	-0.880759	-1.09553	0	1
	1.70398	-0.880741	-1.0955	0	1
	1.70498	-0.880723	-1.09547	0	1
	1.70598	-0.880706	-1.09544	0	1
	1.70698	-0.880689	-1.09541	0	1
	1.70798	-0.880673	-1.09538	0	1
	1.70898	-0.880657	-1.09535	0	1
	1.70998	-0.880642	-1.09532	0	1
	1.71098	-0.880628	-1.09529	0	1
	1.71198	-0.880614	-1.09526	0	1
	1.71298	-0.8806	-1.09523	0	1
	1.71398	-0.880587	-1.0952	0	1
	1.71498	-0.880575	-1.09517	0	1
	1.71598	-0.880563	-1.09514	0	1
	1.71698	-0.880552	-1.09511	0	1
	1.71798	-0.880541	-1.09508	0	1
	1.71898	-0.88053	-1.09505	0	1
	1.71998	-0.88052	-1.09502	0	1
	1.72098	-0.880511	-1.09499	0	1
	1.72198	-0.880502	-1.09496	0	1
	1.72298	-0.880493	-1.09493	0	1
	1.72398	-0.880485	-1.0949	0	1
	1.72498	-0.880478	-1.09487	0	1
	1.72598	-0.880471	-1.09484	0	1
	1.72698	-0.880464	-1.09481	0	1
	1.72798	-0.880458	-1.09478	0	1
	1.72898	-0.880452	-1.09475	0	1
	1.72998	-0.880446	-1.09472	0	1
	1.73098	-0.880441	-1.09468	0	1
	1.73198	-0.880436	-1.09465	0	1
	1.73298	-0.880432	-1.09462	0	1
	1.73398	-0.880428	-1.09459	0	1
	1.73498	-0.880424	-1.09456	0	1
	1.73598	-0.880421	-1.09453	0	1
	1.73698	-0.880418	-1.0945	0	1
	1.73798	-0.880416	-1.09447	0	1
	1.73898	-0.880414	-1.09443	0	1
	1.73998	-0.880412	-1.0944	0	1
	1.74098	-0.88041	-1.09437	0	1
	1.74198	-0.880409	-1.09434	0	1
	1.74298	-0.880408	-1.09431	0	1
	1.74398	-0.880407	-1.09428	0	1
	1.74498	-0.880407	-1.09425	0	1
	1.74598	-0.880407	-1.09421	0	1
	1.74698	-0.880407	-1.09418	0	1
	1.74798	-0.880408	-1.09415	0	1
	1.74898	-0.880409	-1.09412	0	1
	1.74998	-0.88041	-1.09409	0	1
	1.75098	-0.880411	-1.09406	0	1
	1.75198	-0.880413	-1.09402	0	1
	1.75298	-0.880415	-1.09399	0	1
	1.75398	-0.880417	-1.09396	0	1
	1.75498	-0.880419	-1.09393	0	1
	1.75598	-0.880421	-1.0939	0	1
	1.75698	-0.880424	-1.09387	0	1
	1.75798	-0.880426	-1.09384	0	1
	1.75898	-0.880429	-1.0938	0	1
	1.75998	-0.880432	-1.09377	0	1
	1.76098	-0.880435	-1.09374	0	1
	1.76198	-0.880438	-1.09371	0	1
	1.76298	-0.880441	-1.09368	0	1
	1.76398	-0.880444	-1.09365	0	1
	1.76498	-0.880448	-1.09362	0	1
	1.76598	-0.880451	-1.09358	0	1
	1.76698	-0.880454	-1.09355	0	1
	1.76798	-0.880457	-1.09352	0	1
	1.76898	-0.88046	-1.09349	0	1
	1.76998	-0.880464	-1.09346	0	1
	1.77098	-0.880467	-1.09343	0	1
	1.77198	-0.88047	-1.0934	0	1
	1.77298	-0.880473	-1.09337	0	1
	1.77398	-0.880475	-1.09333	0	1
	1.77498	-0.880478	-1.0933	0	1
	1.77598	-0.880481	-1.09327	0	1
	1.77698	-0.880483	-1.09324	0	1
	1.77798	-0.880485	-1.09321	0	1
	1.77898	-0.880487	-1.09318	0	1
	1.77998	-0.880489	-1.09315	0	1
	1.78098	-0.880491	-1.09312	0	1
	1.78198	-0.880492	-1.09309	0	1
	1.78298	-0.880493	-1.09306	0	1
	1.78398	-0.880494	-1.09303	0	1
	1.78498	-0.880495	-1.093	0	1
	1.78598	-0.880495	-1.09297	0	1
	1.78698	-0.880495	-1.09294	0	1
	1.78798	-0.880495	-1.09291	0	1
	1.78898	-0.880494	-1.09288	0	1
	1.78998	-0.880493	-1.09285	0	1
	1.79098	-0.880491	-1.09282	0	1
	1.79198	-0.88049	-1.09279	0	1
	1.79298	-0.880487	-1.09276	0	1
	1.79398	-0.880485	-1.09273	0	1
	1.79498	-0.880482	-1.0927	0	1
	1.79598	-0.880478	-1.09267	0	1
	1.79698	-0.880474	-1.09264	0	1
	1.79798	-0.880469	-1.09261	0	1
	1.79898	-0.880464	-1.09258	0	1
	1.79998	-0.880459	-1.09255	0	1
	1.80098	-0.880453	-1.09252	0	1
	1.80198	-0.880446	-1.0925	0	1
	1.80298	-0.880439	-1.09247	0	1
	1.80398	-0.880431	-1.09244	0	1
	1.80498	-0.880423	-1.09241	0	1
	1.80598	-0.880414	-1.09238	0	1
	1.80698	-0.880404	-1.09235	0	1
	1.80798	-0.880394	-1.09233	0	1
	1.80898	-0.880383	-1.0923	0	1
	1.80998	-0.880371	-1.09227	0	1
	1.81098	-0.880359	-1.09224	0	1
	1.81198	-0.880346	-1.09222	0	1
	1.81298	-0.880332	-1.09219	0	1
	1.81398	-0.880318	-1.09216	0	1
	1.81498	-0.880303	-1.09214	0	1
	1.81598	-0.880287	-1.09211	0	1
	1.81698	-0.88027	-1.09208	0	1
	1.81798	-0.880253	-1.09206	0	1
	1.81898	-0.880235	-1.09203	0	1
	1.81998	-0.880217	-1.092	0	1
	1.82098	-0.880198	-1.09198	0	1
	1.82198	-0.880178	-1.09195	0	1
	1.82298	-0.880158	-1.09192	0	1
	1.82398	-0.880137	-1.0919	0	1
	1.82498	-0.880116	-1.09187	0	1
	1.82598	-0.880094	-1.09185	0	1
	1.82698	-0.880072	-1.09182	0	1
	1.82798	-0.880049	-1.09179	0	1
	1.82898	-0.880025	-1.09177	0	1
	1.82998	-0.880001	-1.09174	0	1
	1.83098	-0.879977	-1.09172	0	1
	1.83198	-0.879952	-1.09169	0	1
	1.83298	-0.879927	-1.09166	0	1
	1.83398	-0.879902	-1.09164	0	1
	1.83498	-0.879876	-1.09161	0	1
	1.83598	-0.87985	-1.09158	0	1
	1.83698	-0.879823	-1.09156	0	1
	1.83798	-0.879796	-1.09153	0	1
	1.83898	-0.879769	-1.0915	0	1
	1.83998	-0.879741	-1.09147	0	1
	1.84098	-0.879714	-1.09145	0	1
	1.84198	-0.879686	-1.09142	0	1
	1.84298	-0.879657	-1.09139	0	1
	1.84398	-0.879629	-1.09136	0	1
	1.84498	-0.8796	-1.09133	0	1
	1.84598	-0.879571	-1.09131	0	1
	1.84698	-0.879542	-1.09128	0	1
	1.84798	-0.879513	-1.09125	0	1
	1.84898	-0.879483	-1.09122	0	1
	1.84998	-0.879454	-1.09119	0	1
	1.85098	-0.879424	-1.09116	0	1
	1.85198	-0.879394	-1.09113	0	1
	1.85298	-0.879364	-1.0911	0	1
	1.85398	-0.879334	-1.09107	0	1
	1.85498	-0.879305	-1.09104	0	1
	1.85598	-0.879275	-1.091	0	1
	1.85698	-0.879245	-1.09097	0	1
	1.85798	-0.879215	-1.09094	0	1
	1.85898	-0.879185	-1.09091	0	1
	1.85998	-0.879155	-1.09087	0	1
	1.86098	-0.879125	-1.09084	0	1
	1.86198	-0.879095	-1.09081	0	1
	1.86298	-0.879065	-1.09077	0	1
	1.86398	-0.879036	-1.09074	0	1
	1.86498	-0.879006	-1.0907	0	1
	1.86598	-0.878977	-1.09067	0	1
	1.86698	-0.878948	-1.09063	0	1
	1.86798	-0.878918	-1.09059	0	1
	1.86898	-0.87889	-1.09056	0	1
	1.86998	-0.878861	-1.09052	0	1
	1.87098	-0.878833	-1.09048	0	1
	1.87198	-0.878804	-1.09044	0	1
	1.87298	-0.878776	-1.0904	0	1
	1.87398	-0.878749	-1.09036	0	1
	1.87498	-0.878721	-1.09032	0	1
	1.87598	-0.878694	-1.09028	0	1
	1.87698	-0.878667	-1.09024	0	1
	1.87798	-0.878641	-1.09019	0	1
	1.87898	-0.878615	-1.09015	0	1
	1.87998	-0.878589	-1.09011	0	1
	1.88098	-0.878563	-1.09006	0	1
	1.88198	-0.878538	-1.09002	0	1
	1.88298	-0.878512	-1.08997	0	1
	1.88398	-0.878487	-1.08993	0	1
	1.88498	-0.878462	-1.08988	0	1
	1.88598	-0.878438	-1.08984	0	1
	1.88698	-0.878413	-1.08979	0	1
	1.88798	-0.878389	-1.08974	0	1
	1.88898	-0.878365	-1.0897	0	1
	1.88998	-0.878341	-1.08965	0	1
	1.89098	-0.878317	-1.0896	0	1
	1.89198	-0.878293	-1.08956	0	1
	1.89298	-0.87827	-1.08951	0	1
	1.89398	-0.878246	-1.08946	0	1
	1.89498	-0.878223	-1.08941	0	1
	1.89598	-0.8782	-1.08937	0	1
	1.89698	-0.878176	-1.08932	0	1
	1.89798	-0.878153	-1.08927	0	1
	1.89898	-0.87813	-1.08922	0	1
	1.89998	-0.878107	-1.08917	0	1
	1.90098	-0.878084	-1.08913	0	1
	1.90198	-0.878061	-1.08908	0	1
	1.90298	-0.878038	-1.08903	0	1
	1.90398	-0.878015	-1.08898	0	1
	1.90498	-0.877992	-1.08893	0	1
	1.90598	-0.877969	-1.08889	0	1
	1.90698	-0.877945	-1.08884	0	1
	1.90798	-0.877922	-1.08879	0	1
	1.90898	-0.877899	-1.08875	0	1
	1.90998	-0.877876	-1.0887	0	1
	1.91098	-0.877852	-1.08865	0	1
	1.91198	-0.877829	-1.08861	0	1
	1.91298	-0.877805	-1.08856	0	1
	1.91398	-0.877781	-1.08852	0	1
	1.91498	-0.877758	-1.08847	0	1
	1.91598	-0.877734	-1.08843	0	1
	1.91698	-0.877709	-1.08839	0	1
	1.91798	-0.877685	-1.08834	0	1
	1.91898	-0.877661	-1.0883	0	1
	1.91998	-0.877636	-1.08826	0	1
	1.92098	-0.877611	-1.08822	0	1
	1.92198	-0.877586	-1.08818	0	1
	1.92298	-0.877561	-1.08813	0	1
	1.92398	-0.877535	-1.0881	0	1
	1.92498	-0.877509	-1.08806	0	1
	1.92598	-0.877483	-1.08802	0	1
	1.92698	-0.877457	-1.08798	0	1
	1.92798	-0.87743	-1.08794	0	1
	1.92898	-0.877404	-1.08791	0	1
	1.92998	-0.877377	-1.08787	0	1
	1.93098	-0.877349	-1.08784	0	1
	1.93198	-0.877321	-1.0878	0	1
	1.93298	-0.877293	-1.08777	0	1
	1.93398	-0.877265	-1.08774	0	1
	1.93498	-0.877236	-1.08771	0	1
	1.93598	-0.877207	-1.08768	0	1
	1.93698	-0.877177	-1.08765	0	1
	1.93798	-0.877147	-1.08762	0	1
	1.93898	-0.877117	-1.0876	0	1
	1.93998	-0.877086	-1.08757	0	1
	1.94098	-0.877055	-1.08754	0	1
	1.94198	-0.877024	-1.08752	0	1
	1.94298	-0.876992	-1.0875	0	1
	1.94398	-0.87696	-1.08748	0	1
	1.94498	-0.876928	-1.08745	0	1
	1.94598	-0.876895	-1.08743	0	1
	1.94698	-0.876862	-1.08741	0	1
	1.94798	-0.876829	-1.08739	0	1
	1.94898	-0.876795	-1.08738	0	1
	1.94998	-0.876761	-1.08736	0	1
	1.95098	-0.876727	-1.08734	0	1
	1.95198	-0.876693	-1.08732	0	1
	1.95298	-0.876658	-1.08731	0	1
	1.95398	-0.876623	-1.08729	0	1
	1.95498	-0.876588	-1.08728	0	1
	1.95598	-0.876553	-1.08726	0	1
	1.95698	-0.876518	-1.08725	0	1
	1.95798	-0.876482	-1.08723	0	1
	1.95898	-0.876446	-1.08722	0	1
	1.95998	-0.87641	-1.08721	0	1
	1.96098	-0.876374	-1.08719	0	1
	1.96198	-0.876338	-1.08718	0	1
	1.96298	-0.876302	-1.08717	0	1
	1.96398	-0.876265	-1.08716	0	1
	1.96498	-0.876229	-1.08714	0	1
	1.96598	-0.876192	-1.08713	0	1
	1.96698	-0.876155	-1.08712	0	1
	1.96798	-0.876118	-1.08711	0	1
	1.96898	-0.876082	-1.0871	0	1
	1.96998	-0.876045	-1.08708	0	1
	1.97098	-0.876008	-1.08707	0	1
	1.97198	-0.875971	-1.08706	0	1
	1.97298	-0.875934	-1.08705	0	1
	1.97398	-0.875897	-1.08703	0	1
	1.97498	-0.87586	-1.08702	0	1
	1.97598	-0.875823	-1.08701	0	1
	1.97698	-0.875786	-1.087	0	1
	1.97798	-0.875749	-1.08698	0	1
	1.97898	-0.875712	-1.08697	0	1
	1.97998	-0.875675	-1.08695	0	1
	1.98098	-0.875638	-1.08694	0	1
	1.98198	-0.875601	-1.08693	0	1
	1.98298	-0.875565	-1.08691	0	1
	1.98398	-0.875528	-1.08689	0	1
	1.98498	-0.875492	-1.08688	0	1
	1.98598	-0.875456	-1.08686	0	1
	1.98698	-0.875419	-1.08684	0	1
	1.98798	-0.875383	-1.08683	0	1
	1.98898	-0.875348	-1.08681	0	1
	1.98998	-0.875312	-1.08679	0	1
	1.99098	-0.875276	-1.08677	0	1
	1.99198	-0.875241	-1.08675	0	1
	1.99298	-0.875206	-1.08673	0	1
	1.99398	-0.875171	-1.0867	0	1
	1.99498	-0.875136	-1.08668	0	1
	1.99598	-0.875102	-1.08666	0	1
	1.99698	-0.875068	-1.08663	0	1
	1.99798	-0.875034	-1.0866	0	1
	1.99898	-0.875	-1.08658	0	1
[truncated: 98,002 more rows]

## Sheet: Supplementary Figure 10
Supplementary Figure 10	C	Projection depth	PSNR				D	Projection depth	Signal Area/Tissue Area
			ROI1	ROI2	ROI3	ROI4			ROI1	ROI2	ROI3	ROI4	Mean
		1.1	28.7708	29.5702	26.0931	27.7351		1.1	0.105156	0.0424039	0.0714031	0.0563269	0.0688225
		2.1	22.1047	21.6029	20.6488	23.9335		2.1	0.167012	0.0714512	0.115575	0.0595351	0.103393
		4.2	20.1954	20.4447	19.4782	21.5601		4.2	0.146047	0.069692	0.105602	0.090806	0.103037
		8.5	19.0639	19.5513	18.0525	20.1406		8.5	0.132666	0.0597033	0.0804885	0.0964837	0.0923353
		21.2	16.7551	16.7462	16.052	17.8593		21.2	0.163818	0.0813225	0.149872	0.126532	0.130386
		42.4	14.5629	14.3221	14.7982	14.7571		42.4	0.193057	0.115136	0.133163	0.117586	0.139736
		84.8	12.2131	12.5426	12.5339	13.0255		84.8	0.122065	0.110222	0.149422	0.10728	0.122247
		217.2	11.291	11.3955	10.8426	11.2849		217.2	0.0713057	0.0801286	0.0989436	0.142895	0.0983182

## Sheet: Supplementary Figure 14
Supplementary Figure 14	Intensity
	393.274
	394.218
	379.594
	375.942
	404.052
	412.222
	390.457
	377.762
	383.75
	375.767
	365.182
	373.22
	380.308
	384.746
	398.775
	400.095
	381.09
	370.636
	384.423
	379.107
	374.936
	399.224
	404.973
	392.12
	378.112
	371.283
	366.814
	381.811
	389.754
	392.216
	381.937
	381.251
	400.343
	395.22
	393.708
	385.182
	377.196
	387.697
	391.977
	380.876
	382.064
	397.119
	395.73
	404.09
	403.29
	400.625
	402.669
	382.999
	382.99
	395.115
	394.233
	385.308
	389.08
	392.795
	393.451
	378.947
	356.661
	363.264
	386.18
	407.221
	395.875
	385.643
	390.148
	398.831
	403.774
	401.067
	409.846
	410.67
	385.955
	384.597
	398.278
	381.425
	386.047
	396.176
	396.745
	397.446
	398.897
	393.422
	391.341
	403.895
	387.667
	356.535
	356.168
	363.576
	370.607
	387.855
	401.468
	404.209
	397.1
	389.465
	384.112
	382.7
	384.016
	373.329
	366.75
	359.654
	383.254
	392.047
	375.09
	361.279
	362.438
	392.006
	398.682
	399.568
	389.338
	382.12
	401.031
	396.082
	387.773
	397.544
	401.608
	420.722
	507.833
	766.906
	1222.87
	1865.05
	2513.14
	2952.77
	3217.14
	3321.49
	3305.88
	3219.42
	3039
	2789.22
	2578.95
	2400.57
	2318.5
	2164.28
	2032.62
	1961.49
	1861.13
	1757.09
	1711.21
	1711.4
	1663.15
	1593.92
	1544.79
	1519.54
	1463.34
	1427.93
	1466.39
	1448.51
	1401.78
	1377.03
	1362.47
	1319.57
	1284.87
	1305.94
	1264.82
	1225.15
	1198.4
	1204.1
	1231.33
	1250.42
	1234.57
	1243.85
	1215.48
	1173.09
	1202.89
	1214.57
	1179.01
	1069.7
	1035.02
	1055.02
	1040.04
	1044.26
	1047.61
	1077.31
	1080.74
	1061.92
	1025.19
	1022.86
	990.445
	957.231
	978.464
	1014.92
	1021.47
	1008.23
	1009.81
	1011.67
	993.917
	966.665
	990.528
	1003.79
	984.085
	962.422
	944.829
	941.08
	956.552
	961.062
	1006.19
	1027.41
	1023.22
	1002.09
	969.698
	941.169
	943.912
	943.641
	925.588
	921.482
	917.489
	903.369
	893.46
	897.875
	904.633
	893.135
	889.859
	924.836
	905.857
	873.344
	859.471
	874.997
	887.752
	850.208
	824.83
	877.715
	880.401
	842.704
	826.566
	838.063
	865.497
	873.458
	866.443
	856.478
	857.007
	858.328
	844.218
	847.063
	836.841
	849.864
	850.325
	870.003
	860.305
	835.058
	821.534
	840.529
	851.795
	857.171
	846.381
	817.64
	836.293
	834.894
	806.679
	779.971
	810.993
	829.067
	793.184
	791.059
	810.253
	824.901
	794.419
	792.801
	804
	801.148
	799.919
	768.364
	763.312
	786.996
	796.013
	780.207
	750.285
	734.541
	713.792
	755.358
	762.278
	764.347
	774.62
	763.015
	752.701
	786.604
	789.227
	781.074
	780.371
	782.84
	800.325
	737.846
	725.827
	787.858
	782.841
	785.825
	778.624
	774.16
	781.163
	827.546
	802.442
	785.565
	809.137
	730.76
	736.117
	760.268
	777.063
	748.892
	688.09
	697.909
	742.704
	758.788
	761.755
	722.726
	713.298
	768.069
	815.342
	762.666
	740.32
	752.845
	760.247
	780.225
	760.893
	748.165
	752.034
	720.672
	686.863
	707.765
	699.031
	679.045
	717.82
	734.555
	739.276
	758.863
	744.04
	739.143
	732.859
	704.594
	694.092
	696.546
	692.062
	718.15
	714.748
	698.929
	687.925
	659.671
	677.491
	707.019
	707.002
	722.374
	741.004
	731.788
	698.442
	691.695
	704.705
	714.503
	708.178
	713.634
	687.855
	698.271
	707.087
	684.374
	713.069
	711.701
	688.827
	716.474
	723.854
	686.32
	690.509
	686.045
	663.247
	682.407
	675.929
	721.351
	750.165
	743.85
	716.923
	677.578
	697.136
	716.643
	730.149
	704.329
	735.153
	731.587
	689.416
	694.215
	666.313
	692.423
	689.067
	689.41
	693.358
	699.452
	692.466
	676.474
	662.568
	689.758
	708.152
	687.332
	703.491
	700.977
	695.916
	695.596
	702.68
	689.993
	688.097
	708.757
	653.997
	669.052
	671.723
	691.515
	696.408
	689.829
	654.525
	647.911
	663.215
	665.24
	683.981
	705.84
	701.404
	694.227
	700.904
	706.271
	699.941
	704.203
	698.316
	677.95
	693.465
	697.59
	691.013
	669.773
	668.707
	671.453
	657.911
	673.074
	675.695
	651.63
	651.235
	676.558
	692.663
	677.797
	665.782
	658.441
	652.161
	651.928
	664.293
	646.725
	645.826
	648.693
	658.183
	674.575
	670.661
	655.598
	654.424
	652.939
	643.938
	658.758
	645.122
	644.03
	635.559
	644.87
	680.648
	658.935
	667.888
	639.683
	643.145
	647.663
	638.938
	619.725
	643.826
	645.217
	641.891
	636.132
	656.282
	623.404
	639.201
	671.568
	674.342
	677.393
	653.982
	635.21
	649.582
	644.282
	630.816
	628.8
	616.761
	630.456
	657.062
	658.082
	640.863
	633.716
	657.768
	644.154
	629.836
	634.622
	627.188
	639.745
	636.594
	645.516
	645.133
	649.584
	617.364
	620.984
	638.344
	627.782
	641.243
	649.064
	652.382
	639.029
	625.123
	641.373
	657.94
	645.76
	627.344
	613.046
	588.158
	614.709
	641.667
	615.057
	633.251
	621.932
	596.2
	604.9
	648.918
	644.735
	625.113
	599.861
	610.439
	616.174
	637.98
	637.777
	615.884
	618.109
	609.975
	601.239
	603.226
	612.75
	620.748
	640.846
	632.287
	608.743
	615.199
	621.371
	610.342
	613.863
	592.461
	594.691
	607.746
	614.544
	584.442
	586.185
	596.038
	624.954
	627.214
	644.471
	598.74
	595.094
	588.429
	602.55
	589.361
	619.835
	597.631
	598.53
	593.904
	593.497
	615.669
	607.497
	598.08
	610.477
	623.528
	606.496
	602.277
	601.035
	589.365
	603.453
	609.646
	627.453
	589.49
	586.132
	596.299
	586.287
	606.492
	601.207
	629.984
	607.331
	609.642
	601.971
	595.581
	590.754
	587.355
	581.967
	600.447
	593.558
	585.002
	572.066
	595.549
	602.497
	585.029
	591.312
	592.943
	566.824
	565.446
	571.924
	583.291
	562.451
	577.731
	616.762
	615.913
	573.698
	592.713
	592.491
	580.975
	558.75
	572.084
	578.314
	573.028
	570.819
	592.468
	563.816
	560.037
	583.939
	593.413
	580.331
	562.941
	571.186
	569.252
	576.045
	597.046
	588.181
	580.701
	543.121
	561.754
	577.204
	599.163
	612.217
	595.818
	565.567
	560.026
	566.488
	550.411
	556.303
	575.741
	597.915
	594.28
	590.002
	551.062
	544.663
	577.016
	597.646
	585.612
	552.535
	541.73
	571.477
	569.745
	564.338
	579.543
	598.124
	591.106
	557.862
	567.569
	579.505
	533.64
	541.443
	575.262
	577.375
	555.414
	526.325
	554.631
	574.688
	571.451
	545.752
	572.881
	566.842
	564.408
	571.629
	571.129
	543.921
	548.823
	544.778
	549.946
	562.18
	543.696
	569.371
	564.839
	549.956
	515.681
	581.803
	568.434
	552.479
	592.805
	587.105
	566.643
	565.98
	548.377
	568.596
	546.179
	580.032
	544.932
	529.515
	532.058
	531.886
	544.616
	574.972
	598.743
	608.487
	576.087
	563.261
	565.619
	562.375
	574.461
	586.34
	549.498
	561.101
	558.839
	558.703
	552.732
	571.392
	546.249
	555.216
	553.05
	562.347
	558.269
	559.039
	576.604
	579.522
	556.244
	589.445
	545.565
	555.215
	528.08
	559.101
	572.681
	588.553
	564.587
	567.974
	573.45
	560.082
	591.112
	559.569
	561.039
	568.311
	549.212
	567.182
	532.18
	527.111
	530.298
	533.823
	554.291
	562.939
	555.191
	574.339
	562.153
	560.96
	526.441
	533.773
	548.925
	561.306
	572.979
	543.679
	520.198
	529.728
	539.486
	568.937
	541.276
	547.815
	540.091
	561.986
	563.25
	540.846
	544.403
	551.433
	552.531
	541.181
	562.573
	517.106
	545.122
	551.874
	567.148
	571.327
	574.73
	556.487
	582.604
	597.115
	573.333
	621.165
	583.168
	581.505
	598.533
	603.135
	563.614
	560.264
	561.054
	580.528
	555.661
	554.581
	544.546
	573.202
	568.095
	542.933
	517.121
	530.357
	543.236
	561.312
	562.62
	568.233
	541.695
	554.852
	541.081
	551.633
	575.181
	598.118
	550.93
	542.631
	558.845
	536.27
	532.581
	561.444
	573.102
	576.984
	551.107
	542.449
	579.991
	561.459
	570.146
	582.576
	593.096
	569.34
	556.562
	516.898
	551.036
	554.691
	563.063
	565.694
	592.784
	605.261
	578.131
	557.194
	555.913
	586.073
	579.819
	574.149
	547.742
	551.854
	565.431
	570.353
	575.869
	561.978
	551.642
	559.482
	566.456
	565.88
	567.97
	563.049
	574.987
	567.773
	540.409
	551.922
	542.53
	556.744
	576.161
	582.172
	582.56
	581.148
	568.573
	584.65
	581.774
	592.104
	564.827
	589.21
	579.546
	575.406
	582.595
	592.828
	599.358
	598.716
	543.624
	552.743
	564.974
	587.88
	579.987
	543.213
	538.357
	532.302
	566.919
	553.587
	546.351
	585.235
	557.55
	594.297
	590.663
	592.884
	545.808
	596.496
	552.256
	599.08
	601.39
	585.284
	569.786
	604.84
	561.801
	576.708
	573.386
	578.693
	577.647
	597.58
	577.263
	580.73
	619.186
	600.388
	598.684
	585.593
	544.259
	585.874
	583.033
	587.703
	574.958
	575.651
	570.033
	566.006
	601.703
	584.328
	626.579
	592.736
	595.116
	551.023
	586.369
	579.084
	586.944
	594.505
	601.404
	622.378
	610.379
	600.763
	564.2
	562.453
	564.371
	576.624
	596.39
	587.857
	582.807
	601.541
	590.991
	606.936
	579.093
	580.403
	600.97
	632.116
	549.183
	559.257
	618.35
	632.358
	621.155
	631.145
	617.205
	596.118
	615.824
	626.736
	619.78
	638.069
	593.27
	648.021
	655.332
	620.828
	578.745
	621.068
	614.415
	580.667
	621.261
	617.661
	606.135
	609.153
	579.077
	568.675
	626.626
	629.694
	596.151
	612.881
	626.462
	613.237
	608.397
	644.701
	636.54
	588.023
	644.932
	641.769
	640.049
	634.461
	624.095
	601.342
	616.971
	615.475
	613.036
	642.472
	637.64
	617.798
	599.991
	623.578
	680.521
	625.35
	600.615
	625.07
	627.993
	629.862
	666.791
	642.86
	581.539
	599.197
	652.363
	618.555
	608.54
	601.241
	597.748
	590.496
	611.61
	603.196
	635.123
	622.42
	618.007
	653.39
	641.213
	637.629
	641.435
	600.519
	632.394
	640.303
	619.011
	630.534
	635
	609.954
	643.941
	657.223
	666.696
	627.814
	672.024
	635.933
	650.479
	612.012
	653.038
	626.657
	635.059
	600.211
	610.649
	589.912
	624.771
	660.436
	668.697
	662.28
	645.166
	652.497
	619.881
	688.359
	678.158
	728.645
	641.54
	652.209
	651.185
	662.004
	619.789
	674.454
	633.721
	660.808
	637.212
	629.05
	622.245
	670.305
	703.716
	635.503
	627.632
	676.203
	682.475
	644.097
	669.593
	692.831
	661.346
	664.735
	669.924
	650.928
	672.789
	708.556
	676.638
	647.272
	682.886
	687.568
	639.139
	673.31
	694.333
	683.017
	680.053
	652.994
	697.55
	665.653
	653.063
	679.464
	662.021
	678.092
	678.073
	689.916
	683.45
	671.536
	740.641
	684.112
	692.129
	690.343
	706.322
	681.923
	653.74
	672.232
	700.503
	710.303
	678.925
	726.395
	699.134
	650.131
	678.952
	662.298
	663.384
	684.004
	702.586
	704.1
	692.231
	687.661
	710.474
	716.615
	698.817
	704.395
	664.198
	660.64
	679.463
	713.728
	700.154
	724.604
	688.362
	675.936
	701.01
	732.488
	712.113
	723.637
	715.704
	706.393
	676.184
	753.402
	729.038
	714.611
	703.533
	661.162
	702.773
	686.825
	686.001
	687.233
	718.931
	663.475
	672.91
	713.27
	712.852
	729.696
	707.002
	660.901
	717.034
	680.067
	762.051
	718.842
	733.731
	713.611
	682.661
	681.708
	730.826
	734.349
	722.741
	722.615
	669.741
	749.265
	745.169
	697.907
	698.08
	747.531
	736.811
	715.609
	724.168
	699.288
	704.718
	722.71
	778.872
	696.26
	684.98
	720.212
	748.859
	751.731
	744.408
	702.462
	732.043
	758.275
	746.271
	740.73
	723.81
	713.711
	708.177
	750.916
	730.435
	742.367
	728.966
	713.007
	697.159
	725.368
	748.97
	748.386
	740.925
	733.616
	726.108
	744.499
	731.529
	724.92
	708.825
	718.868
	715.311
	735.655
	751.348
	717.22
	728.554
	755.12
	695.612
	709.713
	706.844
	743.6
	746.795
	743.741
	756.159
	722.138
	753.637
	729.883
	774.402
	701.15
	748.932
	737.183
	748.658
	729.133
	715.023
	727.674
	742.677
	769.974
	738.78
	740.941
	764.833
	793.266
	752.557
	721.313
	749.096
	787.82
	773.663
	780.275
	737.044
	752.315
	742.617
	753.904
	751.919
	764.83
	791.777
	757.834
	801.286
	776.504
	763.983
	781.3
	765.063
	741.285
	772.017
	781.272
	807.867
	784.524
	792.978
	786.386
	751.969
	778.075
	781.726
	778.433
	778.087
	766.671
	764.62
	784.718
	785.803
	749.372
	727.326
	774.392
	778.855
	757.757
	727.7
	733.197
	774.806
	780.478
	824.86
	783.237
	733.873
	791.333
	804.506
	767.88
	785.297
	832.293
	805.234
	845.336
	819.085
	798.866
	812.432
	827.876
	804.194
	811.791
	821.276
	823.354
	799.964
	808.492
	809.06
	828.766
	817.94
	779.656
	808.075
	811.914
	837.871
	804.406
	806.363
	817.605
	842.214
	820.025
	843.598
	799.663
	826.844
	815.112
	840.527
	859.732
	825.317
	828.582
	853.52
	883.486
	844.228
	873.053
	852.458
	818.587
	848.8
	843.832
	814.514
	824.38
	843.864
	848.341
	871.042
	853.267
	856.737
	815.845
	899.168
	883.796
	903.169
	867.384
	849.35
	875.73
	916.701
	854.42
	964.887
	886.106
	900.803
	925.317
	848.963
	963.321
	907.666
	872.355
	907.617
	915.132
	905.548
	864.615
	979.509
	996.467
	939.862
	957.628
	974.415
	996.334
	970.445
	1029.68
	969.381
	989.404
	998.647
	1026.28
	1021.35
	986.616
	978.404
	973.181
	1055.57
	1054.53
	1058.24
	1010.02
	1045.27
	1063.62
	1120.94
	1054.48
	1120.87
	1052.33
	1095.03
	1154.42
	1155.87
	1107.87
	1177.84
	1188.33
	1207.83
	1223.14
	1204.35
	1224.13
	1298.92
	1258.36
	1244.75
	1350.31
	1332.11
	1401.67
	1407.19
	1452.48
	1411.57
	1435.34
	1560.37
	1557.84
	1602.38
	1647.34
	1771.91
	1902.73
	2018.12
	2149.77
	2455.93
	2808.45
	3017.25
	3165.18
	2890.08
	2463.6
	2048.22
	1649.94
	1303.22
	1064.73
	827.992
	677.651
	646.167
	586.023
	570.466
	556.488
	540.504
	536.183
	513.507
	532.247
	526.361
	505.328
	522.799
	555.256
	545.633
	513.166
	543.591
	501.63
	514.551
	510.714
	541.903
	502.645
	538.461
	525.294
	513.529
	513.685
	526.736
	533.623
	513.42
	531.83
	480.419
	560.146
	560.026
	591.687
	570.135
	553.883
	546.967
	495.087
	516.291
	512.023
	482.075
	502.145
	561.491
	493.633
	514.065
	537.755
	515.348
	560.21
	550.234
	543.568
	575.252
	560.727
	548.21
	528.107
	547.156
	508.388
	555.547
	533.832
	553.258
	522.225
	548.462
	547.079
	593.875
	506.351
	549.102
	517.588
	529.688
	556.122
	534.37
	561.732
	583.99
	531.125
	500.774
	555.024
	524.524
	558.517
	531.24
	535.275
	540.327
	527.341
	539.267
	543.554
	553.148
	528.528
	522.873
	542.053
	514.097
	563.609
	509.175
	552.897
	525.067

## Sheet: Supplementary Figure 15
Supplementary Figure 15	Time	Galvo Signal	Camera Trigger	Laser Shutter
	0	-1.16997	0	0
	0.000625	-1.16997	0	0
	0.00125	-1.16997	0	0
	0.001875	-1.16997	0	0
	0.0025	-1.16997	0	0
	0.003125	-1.16997	0	0
	0.00375	-1.16997	0	0
	0.004375	-1.16997	0	0
	0.005	-1.16997	0	0
	0.005625	-1.16997	0	0
	0.00625	-1.16997	0	0
	0.006875	-1.16997	0	0
	0.0075	-1.16997	0	0
	0.008125	-1.16997	0	0
	0.00875	-1.16997	0	0
	0.009375	-1.16997	0	0
	0.01	-1.16997	0	0
	0.010625	-1.16997	0	0
	0.01125	-1.16997	0	0
	0.011875	-1.16997	0	0
	0.0125	-1.16997	0	0
	0.013125	-1.16997	0	0
	0.01375	-1.16997	0	0
	0.014375	-1.16997	0	0
	0.015	-1.16997	0	0
	0.015625	-1.16997	0	0
	0.01625	-1.16997	0	0
	0.016875	-1.16997	0	0
	0.0175	-1.16997	0	0
	0.018125	-1.16997	0	0
	0.01875	-1.16997	0	0
	0.019375	-1.16997	0	0
	0.02	-1.16997	0	0
	0.020625	-1.16997	0	0
	0.02125	-1.16997	0	0
	0.021875	-1.16997	0	0
	0.0225	-1.16997	0	0
	0.023125	-1.16997	0	0
	0.02375	-1.16997	0	0
	0.024375	-1.16997	0	0
	0.025	-1.16997	0	0
	0.025625	-1.16997	0	0
	0.02625	-1.16997	0	0
	0.026875	-1.16997	0	0
	0.0275	-1.16997	0	0
	0.028125	-1.16997	0	0
	0.02875	-1.16997	0	0
	0.029375	-1.16997	0	0
	0.03	-1.16997	0	0
	0.030625	-1.16997	0	0
	0.03125	-1.16997	0	0
	0.031875	-1.16997	0	0
	0.0325	-1.16997	0	0
	0.033125	-1.16997	0	0
	0.03375	-1.16997	0	0
	0.034375	-1.16997	0	0
	0.035	-1.16997	0	0
	0.035625	-1.16997	0	0
	0.03625	-1.16997	0	0
	0.036875	-1.16997	0	0
	0.0375	-1.16997	0	0
	0.038125	-1.16997	0	0
	0.03875	-1.16997	0	0
	0.039375	-1.16997	0	0
	0.04	-1.16997	0	0
	0.040625	-1.16997	0	0
	0.04125	-1.16997	0	0
	0.041875	-1.16997	0	0
	0.0425	-1.16997	0	0
	0.043125	-1.16997	0	0
	0.04375	-1.16997	0	0
	0.044375	-1.16997	0	0
	0.045	-1.16997	0	0
	0.045625	-1.16997	0	0
	0.04625	-1.16997	0	0
	0.046875	-1.16997	0	0
	0.0475	-1.16997	0	0
	0.048125	-1.16997	0	0
	0.04875	-1.16997	0	0
	0.049375	-1.16997	0	0
	0.05	-1.16997	0	0
	0.050625	-1.16997	0	0
	0.05125	-1.16997	0	0
	0.051875	-1.16997	0	0
	0.0525	-1.16997	0	0
	0.053125	-1.16997	0	0
	0.05375	-1.16997	0	0
	0.054375	-1.16997	0	0
	0.055	-1.16997	0	0
	0.055625	-1.16997	0	0
	0.05625	-1.16997	0	0
	0.056875	-1.16997	0	0
	0.0575	-1.16997	0	0
	0.058125	-1.16997	0	0
	0.05875	-1.16997	0	0
	0.059375	-1.16997	0	0
	0.06	-1.16997	0	0
	0.060625	-1.16997	0	0
	0.06125	-1.16997	0	0
	0.061875	-1.16997	0	0
	0.0625	-1.16997	0	0
	0.063125	-1.16997	0	0
	0.06375	-1.16997	0	0
	0.064375	-1.16997	0	0
	0.065	-1.16997	0	0
	0.065625	-1.16997	0	0
	0.06625	-1.16997	0	0
	0.066875	-1.16997	0	0
	0.0675	-1.16997	0	0
	0.068125	-1.16997	0	0
	0.06875	-1.16997	0	0
	0.069375	-1.16997	0	0
	0.07	-1.16997	0	0
	0.070625	-1.16997	0	0
	0.07125	-1.16997	0	0
	0.071875	-1.16997	0	0
	0.0725	-1.16997	0	0
	0.073125	-1.16997	0	0
	0.07375	-1.16997	0	0
	0.074375	-1.16997	0	0
	0.075	-1.16997	0	0
	0.075625	-1.16997	0	0
	0.07625	-1.16997	0	0
	0.076875	-1.16997	0	0
	0.0775	-1.16997	0	0
	0.078125	-1.16997	0	0
	0.07875	-1.16997	0	0
	0.079375	-1.16997	0	0
	0.08	-1.16997	0	0
	0.080625	-1.16997	0	0
	0.08125	-1.16997	0	0
	0.081875	-1.16997	0	0
	0.0825	-1.16997	0	0
	0.083125	-1.16997	0	0
	0.08375	-1.16997	0	0
	0.084375	-1.16997	0	0
	0.085	-1.16997	0	0
	0.085625	-1.16997	0	0
	0.08625	-1.16997	0	0
	0.086875	-1.16997	0	0
	0.0875	-1.16997	0	0
	0.088125	-1.16997	0	0
	0.08875	-1.16997	0	0
	0.089375	-1.16997	0	0
	0.09	-1.16997	0	0
	0.090625	-1.16997	0	0
	0.09125	-1.16997	0	0
	0.091875	-1.16997	0	0
	0.0925	-1.16997	0	0
	0.093125	-1.16997	0	0
	0.09375	-1.16997	0	0
	0.094375	-1.16997	0	0
	0.095	-1.16997	0	0
	0.095625	-1.16997	0	0
	0.09625	-1.16997	0	0
	0.096875	-1.16997	0	0
	0.0975	-1.16997	0	0
	0.098125	-1.16997	0	0
	0.09875	-1.16997	0	0
	0.099375	-1.16997	0	0
	0.1	-1.16997	0	0
	0.100625	-1.16997	0	0
	0.10125	-1.16997	0	0
	0.101875	-1.16997	0	0
	0.1025	-1.16997	0	0
	0.103125	-1.16997	0	0
	0.10375	-1.16997	0	0
	0.104375	-1.16997	0	0
	0.105	-1.16997	0	0
	0.105625	-1.16997	0	0
	0.10625	-1.16997	0	0
	0.106875	-1.16997	0	0
	0.1075	-1.16997	0	0
	0.108125	-1.16997	0	0
	0.10875	-1.16997	0	0
	0.109375	-1.16997	0	0
	0.11	-1.16997	0	0
	0.110625	-1.16997	0	0
	0.11125	-1.16997	0	0
	0.111875	-1.16997	0	0
	0.1125	-1.16997	0	0
	0.113125	-1.16997	0	0
	0.11375	-1.16997	0	0
	0.114375	-1.16997	0	0
	0.115	-1.16997	0	0
	0.115625	-1.16997	0	0
	0.11625	-1.16997	0	0
	0.116875	-1.16997	0	0
	0.1175	-1.16997	0	0
	0.118125	-1.16997	0	0
	0.11875	-1.16997	0	0
	0.119375	-1.16997	0	0
	0.12	-1.16997	0	0
	0.120625	-1.16997	0	0
	0.12125	-1.16997	0	0
	0.121875	-1.16997	0	0
	0.1225	-1.16997	0	0
	0.123125	-1.16997	0	0
	0.12375	-1.16997	0	0
	0.124375	-1.16997	0	0
	0.125	-1.16997	0	0
	0.125625	-1.16997	0	0
	0.12625	-1.16997	0	0
	0.126875	-1.16997	0	0
	0.1275	-1.16997	0	0
	0.128125	-1.16997	0	0
	0.12875	-1.16997	0	0
	0.129375	-1.16997	0	0
	0.13	-1.16997	0	0
	0.130625	-1.16997	0	0
	0.13125	-1.16997	0	0
	0.131875	-1.16997	0	0
	0.1325	-1.16997	0	0
	0.133125	-1.16997	0	0
	0.13375	-1.16997	0	0
	0.134375	-1.16997	0	0
	0.135	-1.16997	0	0
	0.135625	-1.16997	0	0
	0.13625	-1.16997	0	0
	0.136875	-1.16997	0	0
	0.1375	-1.16997	0	0
	0.138125	-1.16997	0	0
	0.13875	-1.16997	0	0
	0.139375	-1.16997	0	0
	0.14	-1.16997	0	0
	0.140625	-1.16997	0	0
	0.14125	-1.16997	0	0
	0.141875	-1.16997	0	0
	0.1425	-1.16997	0	0
	0.143125	-1.16997	0	0
	0.14375	-1.16997	0	0
	0.144375	-1.16997	0	0
	0.145	-1.16997	0	0
	0.145625	-1.16997	0	0
	0.14625	-1.16997	0	0
	0.146875	-1.16997	0	0
	0.1475	-1.16997	0	0
	0.148125	-1.16997	0	0
	0.14875	-1.16997	0	0
	0.149375	-1.16997	0	0
	0.15	-1.16997	0	0
	0.150625	-1.16997	0	0
	0.15125	-1.16997	0	0
	0.151875	-1.16997	0	0
	0.1525	-1.16997	0	0
	0.153125	-1.16997	0	0
	0.15375	-1.16997	0	0
	0.154375	-1.16997	0	0
	0.155	-1.16997	0	0
	0.155625	-1.16997	0	0
	0.15625	-1.16997	0	0
	0.156875	-1.16997	0	0
	0.1575	-1.16997	0	0
	0.158125	-1.16997	0	0
	0.15875	-1.16997	0	0
	0.159375	-1.16997	0	0
	0.16	-1.16997	0	0
	0.160625	-1.16997	0	0
	0.16125	-1.16997	0	0
	0.161875	-1.16997	0	0
	0.1625	-1.16997	0	0
	0.163125	-1.16997	0	0
	0.16375	-1.16997	0	0
	0.164375	-1.16926	0	0
	0.165	-1.16926	0	0
	0.165625	-1.16926	0	0
	0.16625	-1.16926	0	0
	0.166875	-1.16926	0	0
	0.1675	-1.16926	0	0
	0.168125	-1.16926	0	0
	0.16875	-1.16926	0	0
	0.169375	-1.16926	0	0
	0.17	-1.16926	0	0
	0.170625	-1.16926	0	0
	0.17125	-1.16926	0	0
	0.171875	-1.16926	0	0
	0.1725	-1.16926	0	0
	0.173125	-1.16926	0	0
	0.17375	-1.16926	0	0
	0.174375	-1.16926	0	0
	0.175	-1.16926	0	0
	0.175625	-1.16926	0	0
	0.17625	-1.16926	0	0
	0.176875	-1.16926	0	0
	0.1775	-1.16926	0	0
	0.178125	-1.16926	0	0
	0.17875	-1.16926	0	0
	0.179375	-1.16926	0	0
	0.18	-1.16926	0	0
	0.180625	-1.16926	0	0
	0.18125	-1.16926	0	0
	0.181875	-1.16926	0	0
	0.1825	-1.16926	0	0
	0.183125	-1.16926	0	0
	0.18375	-1.16926	0	0
	0.184375	-1.16926	0	0
	0.185	-1.16926	0	0
	0.185625	-1.16926	0	0
	0.18625	-1.16926	0	0
	0.186875	-1.16926	0	0
	0.1875	-1.16926	0	0
	0.188125	-1.16926	0	0
	0.18875	-1.16926	0	0
	0.189375	-1.16926	0	0
	0.19	-1.16926	0	0
	0.190625	-1.16926	0	0
	0.19125	-1.16926	0	0
	0.191875	-1.16926	0	0
	0.1925	-1.16926	0	0
	0.193125	-1.16926	0	0
	0.19375	-1.16926	0	0
	0.194375	-1.16926	0	0
	0.195	-1.16926	0	0
	0.195625	-1.16926	0	0
	0.19625	-1.16926	0	0
	0.196875	-1.16926	0	0
	0.1975	-1.16926	0	0
	0.198125	-1.16926	0	0
	0.19875	-1.16926	0	0
	0.199375	-1.16926	0	0
	0.2	-1.16926	0	0
	0.200625	-1.16926	0	0
	0.20125	-1.16926	0	0
	0.201875	-1.16926	0	0
	0.2025	-1.16926	0	0
	0.203125	-1.16926	0	0
	0.20375	-1.16926	0	0
	0.204375	-1.16926	0	0
	0.205	-1.16926	0	0
	0.205625	-1.16926	0	0
	0.20625	-1.16926	0	0
	0.206875	-1.16926	0	0
	0.2075	-1.16926	0	0
	0.208125	-1.16926	0	0
	0.20875	-1.16926	0	0
	0.209375	-1.16926	0	0
	0.21	-1.16926	0	0
	0.210625	-1.16926	0	0
	0.21125	-1.16926	0	0
	0.211875	-1.16926	0	0
	0.2125	-1.16926	0	0
	0.213125	-1.16926	0	0
	0.21375	-1.16926	0	0
	0.214375	-1.16926	0	0
	0.215	-1.16926	0	0
	0.215625	-1.16926	0	0
	0.21625	-1.16926	0	0
	0.216875	-1.16926	0	0
	0.2175	-1.16926	0	0
	0.218125	-1.16926	0	0
	0.21875	-1.16926	0	0
	0.219375	-1.16926	0	0
	0.22	-1.16926	0	0
	0.220625	-1.16926	0	0
	0.22125	-1.16926	0	0
	0.221875	-1.16926	0	0
	0.2225	-1.16926	0	0
	0.223125	-1.16926	0	0
	0.22375	-1.16926	0	0
	0.224375	-1.16926	0	0
	0.225	-1.16926	0	0
	0.225625	-1.16926	0	0
	0.22625	-1.16926	0	0
	0.226875	-1.16926	0	0
	0.2275	-1.16926	0	0
	0.228125	-1.16926	0	0
	0.22875	-1.16926	0	0
	0.229375	-1.16926	0	0
	0.23	-1.16926	0	0
	0.230625	-1.16926	0	0
	0.23125	-1.16926	0	0
	0.231875	-1.16926	0	0
	0.2325	-1.16926	0	0
	0.233125	-1.16926	0	0
	0.23375	-1.16926	0	0
	0.234375	-1.16926	0	0
	0.235	-1.16926	0	0
	0.235625	-1.16926	0	0
	0.23625	-1.16926	0	0
	0.236875	-1.16926	0	0
	0.2375	-1.16926	0	0
	0.238125	-1.16926	0	0
	0.23875	-1.16926	0	0
	0.239375	-1.16926	0	0
	0.24	-1.16926	0	0
	0.240625	-1.16926	0	0
	0.24125	-1.16926	0	0
	0.241875	-1.16926	0	0
	0.2425	-1.16926	0	0
	0.243125	-1.16926	0	0
	0.24375	-1.16926	0	0
	0.244375	-1.16926	0	0
	0.245	-1.16926	0	0
	0.245625	-1.16926	0	0
	0.24625	-1.16926	0	0
	0.246875	-1.16926	0	0
	0.2475	-1.16926	0	0
	0.248125	-1.16926	0	0
	0.24875	-1.16926	0	0
	0.249375	-1.16926	0	0
	0.25	-1.16926	0	0
	0.250625	-1.16926	0	0
	0.25125	-1.16926	0	0
	0.251875	-1.16926	0	0
	0.2525	-1.16926	0	0
	0.253125	-1.16926	0	0
	0.25375	-1.16926	0	0
	0.254375	-1.16926	0	0
	0.255	-1.16926	0	0
	0.255625	-1.16926	0	0
	0.25625	-1.16926	0	0
	0.256875	-1.16926	0	0
	0.2575	-1.16926	0	0
	0.258125	-1.16926	0	0
	0.25875	-1.16926	0	0
	0.259375	-1.16926	0	0
	0.26	-1.16926	0	0
	0.260625	-1.16926	0	0
	0.26125	-1.16926	0	0
	0.261875	-1.16926	0	0
	0.2625	-1.16926	0	0
	0.263125	-1.16926	0	0
	0.26375	-1.16926	0	0
	0.264375	-1.16926	0	0
	0.265	-1.16926	0	0
	0.265625	-1.16926	0	0
	0.26625	-1.16926	0	0
	0.266875	-1.16926	0	0
	0.2675	-1.16926	0	0
	0.268125	-1.16926	0	0
	0.26875	-1.16926	0	0
	0.269375	-1.16926	0	0
	0.27	-1.16926	0	0
	0.270625	-1.16926	0	0
	0.27125	-1.16926	0	0
	0.271875	-1.16926	0	0
	0.2725	-1.16926	0	0
	0.273125	-1.16926	0	0
	0.27375	-1.16926	0	0
	0.274375	-1.16926	0	0
	0.275	-1.16926	0	0
	0.275625	-1.16926	0	0
	0.27625	-1.16926	0	0
	0.276875	-1.16926	0	0
	0.2775	-1.16855	0	0
	0.278125	-1.16855	0	0
	0.27875	-1.16855	0	0
	0.279375	-1.16855	0	0
	0.28	-1.16855	0	0
	0.280625	-1.16855	0	0
	0.28125	-1.16855	0	0
	0.281875	-1.16855	0	0
	0.2825	-1.16855	0	0
	0.283125	-1.16855	0	0
	0.28375	-1.16855	0	0
	0.284375	-1.16855	0	0
	0.285	-1.16855	0	0
	0.285625	-1.16855	0	0
	0.28625	-1.16855	0	0
	0.286875	-1.16855	0	0
	0.2875	-1.16855	0	0
	0.288125	-1.16855	0	0
	0.28875	-1.16855	0	0
	0.289375	-1.16855	0	0
	0.29	-1.16855	0	0
	0.290625	-1.16855	0	0
	0.29125	-1.16855	0	0
	0.291875	-1.16855	0	0
	0.2925	-1.16855	0	0
	0.293125	-1.16855	0	0
	0.29375	-1.16855	0	0
	0.294375	-1.16855	0	0
	0.295	-1.16855	0	0
	0.295625	-1.16855	0	0
	0.29625	-1.16855	0	0
	0.296875	-1.16855	0	0
	0.2975	-1.16855	0	0
	0.298125	-1.16855	0	0
	0.29875	-1.16855	0	0
	0.299375	-1.16855	0	0
	0.3	-1.16855	0	0
	0.300625	-1.16855	0	0
	0.30125	-1.16855	0	0
	0.301875	-1.16855	0	0
	0.3025	-1.16855	0	0
	0.303125	-1.16855	0	0
	0.30375	-1.16855	0	0
	0.304375	-1.16855	0	0
	0.305	-1.16855	0	0
	0.305625	-1.16855	0	0
	0.30625	-1.16855	0	0
	0.306875	-1.16855	0	0
	0.3075	-1.16855	0	0
	0.308125	-1.16855	0	0
	0.30875	-1.16855	0	0
	0.309375	-1.16855	0	0
	0.31	-1.16855	0	0
	0.310625	-1.16855	0	0
	0.31125	-1.16855	0	0
	0.311875	-1.16855	0	0
	0.3125	-1.16855	0	0
	0.313125	-1.16855	0	0
	0.31375	-1.16855	0	0
	0.314375	-1.16855	0	0
	0.315	-1.16855	0	0
	0.315625	-1.16855	0	0
	0.31625	-1.16855	0	0
	0.316875	-1.16855	0	0
	0.3175	-1.16855	0	0
	0.318125	-1.16855	0	0
	0.31875	-1.16855	0	0
	0.319375	-1.16855	0	0
	0.32	-1.16855	0	0
	0.320625	-1.16855	0	0
	0.32125	-1.16855	0	0
	0.321875	-1.16855	0	0
	0.3225	-1.16855	0	0
	0.323125	-1.16855	0	0
	0.32375	-1.16855	0	0
	0.324375	-1.16855	0	0
	0.325	-1.16855	0	0
	0.325625	-1.16855	0	0
	0.32625	-1.16855	0	0
	0.326875	-1.16855	0	0
	0.3275	-1.16855	0	0
	0.328125	-1.16855	0	0
	0.32875	-1.16855	0	0
	0.329375	-1.16855	0	0
	0.33	-1.16855	0	0
	0.330625	-1.16855	0	0
	0.33125	-1.16855	0	0
	0.331875	-1.16855	0	0
	0.3325	-1.16855	0	0
	0.333125	-1.16855	0	0
	0.33375	-1.16855	0	0
	0.334375	-1.16855	0	0
	0.335	-1.16855	0	0
	0.335625	-1.16855	0	0
	0.33625	-1.16855	0	0
	0.336875	-1.16855	0	0
	0.3375	-1.16855	0	0
	0.338125	-1.16855	0	0
	0.33875	-1.16855	0	0
	0.339375	-1.16855	0	0
	0.34	-1.16855	0	0
	0.340625	-1.16855	0	0
	0.34125	-1.16855	0	0
	0.341875	-1.16855	0	0
	0.3425	-1.16855	0	0
	0.343125	-1.16855	0	0
	0.34375	-1.16855	0	0
	0.344375	-1.16855	0	0
	0.345	-1.16855	0	0
	0.345625	-1.16855	0	0
	0.34625	-1.16855	0	0
	0.346875	-1.16855	0	0
	0.3475	-1.16855	0	0
	0.348125	-1.16855	0	0
	0.34875	-1.16855	0	0
	0.349375	-1.16855	0	0
	0.35	-1.16855	0	0
	0.350625	-1.16855	0	0
	0.35125	-1.16855	0	0
	0.351875	-1.16855	0	0
	0.3525	-1.16855	0	0
	0.353125	-1.16783	0	0
	0.35375	-1.16783	0	0
	0.354375	-1.16783	0	0
	0.355	-1.16783	0	0
	0.355625	-1.16783	0	0
	0.35625	-1.16783	0	0
	0.356875	-1.16783	0	0
	0.3575	-1.16783	0	0
	0.358125	-1.16783	0	0
	0.35875	-1.16783	0	0
	0.359375	-1.16783	0	0
	0.36	-1.16783	0	0
	0.360625	-1.16783	0	0
	0.36125	-1.16783	0	0
	0.361875	-1.16783	0	0
	0.3625	-1.16783	0	0
	0.363125	-1.16783	0	0
	0.36375	-1.16783	0	0
	0.364375	-1.16783	0	0
	0.365	-1.16783	0	0
	0.365625	-1.16783	0	0
	0.36625	-1.16783	0	0
	0.366875	-1.16783	0	0
	0.3675	-1.16783	0	0
	0.368125	-1.16783	0	0
	0.36875	-1.16783	0	0
	0.369375	-1.16783	0	0
	0.37	-1.16783	0	0
	0.370625	-1.16783	0	0
	0.37125	-1.16783	0	0
	0.371875	-1.16783	0	0
	0.3725	-1.16783	0	0
	0.373125	-1.16783	0	0
	0.37375	-1.16783	0	0
	0.374375	-1.16783	0	0
	0.375	-1.16783	0	0
	0.375625	-1.16783	0	0
	0.37625	-1.16783	0	0
	0.376875	-1.16783	0	0
	0.3775	-1.16783	0	0
	0.378125	-1.16783	0	0
	0.37875	-1.16783	0	0
	0.379375	-1.16783	0	0
	0.38	-1.16783	0	0
	0.380625	-1.16783	0	0
	0.38125	-1.16783	0	0
	0.381875	-1.16783	0	0
	0.3825	-1.16783	0	0
	0.383125	-1.16783	0	0
	0.38375	-1.16783	0	0
	0.384375	-1.16783	0	0
	0.385	-1.16783	0	0
	0.385625	-1.16783	0	0
	0.38625	-1.16783	0	0
	0.386875	-1.16783	0	0
	0.3875	-1.16783	0	0
	0.388125	-1.16783	0	0
	0.38875	-1.16783	0	0
	0.389375	-1.16783	0	0
	0.39	-1.16783	0	0
	0.390625	-1.16783	0	0
	0.39125	-1.16783	0	0
	0.391875	-1.16783	0	0
	0.3925	-1.16783	0	0
	0.393125	-1.16783	0	0
	0.39375	-1.16783	0	0
	0.394375	-1.16783	0	0
	0.395	-1.16783	0	0
	0.395625	-1.16783	0	0
	0.39625	-1.16783	0	0
	0.396875	-1.16783	0	0
	0.3975	-1.16783	0	0
	0.398125	-1.16783	0	0
	0.39875	-1.16783	0	0
	0.399375	-1.16783	0	0
	0.4	-1.16783	0	0
	0.400625	-1.16783	0	0
	0.40125	-1.16783	0	0
	0.401875	-1.16783	0	0
	0.4025	-1.16783	0	0
	0.403125	-1.16783	0	0
	0.40375	-1.16783	0	0
	0.404375	-1.16783	0	0
	0.405	-1.16783	0	0
	0.405625	-1.16783	0	0
	0.40625	-1.16783	0	0
	0.406875	-1.16783	0	0
	0.4075	-1.16783	0	0
	0.408125	-1.16783	0	0
	0.40875	-1.16783	0	0
	0.409375	-1.16783	0	0
	0.41	-1.16783	0	0
	0.410625	-1.16783	0	0
	0.41125	-1.16783	0	0
	0.411875	-1.16783	0	0
	0.4125	-1.16783	0	0
	0.413125	-1.16783	0	0
	0.41375	-1.16783	0	0
	0.414375	-1.16783	0	0
	0.415	-1.16783	0	0
	0.415625	-1.16783	0	0
	0.41625	-1.16783	0	0
	0.416875	-1.16783	0	0
	0.4175	-1.16783	0	0
	0.418125	-1.16783	0	0
	0.41875	-1.16783	0	0
	0.419375	-1.16783	0	0
	0.42	-1.16783	0	0
	0.420625	-1.16783	0	0
	0.42125	-1.16783	0	0
	0.421875	-1.16783	0	0
	0.4225	-1.16783	0	0
	0.423125	-1.16783	0	0
	0.42375	-1.16783	0	0
	0.424375	-1.16783	0	0
	0.425	-1.16783	0	0
	0.425625	-1.16783	0	0
	0.42625	-1.16783	0	0
	0.426875	-1.16783	0	0
	0.4275	-1.16783	0	0
	0.428125	-1.16783	0	0
	0.42875	-1.16712	0	0
	0.429375	-1.16712	0	0
	0.43	-1.16712	0	0
	0.430625	-1.16712	0	0
	0.43125	-1.16712	0	0
	0.431875	-1.16712	0	0
	0.4325	-1.16712	0	0
	0.433125	-1.16712	0	0
	0.43375	-1.16712	0	0
	0.434375	-1.16712	0	0
	0.435	-1.16712	0	0
	0.435625	-1.16712	0	0
	0.43625	-1.16712	0	0
	0.436875	-1.16712	0	0
	0.4375	-1.16712	0	0
	0.438125	-1.16712	0	0
	0.43875	-1.16712	0	0
	0.439375	-1.16712	0	0
	0.44	-1.16712	0	0
	0.440625	-1.16712	0	0
	0.44125	-1.16712	0	0
	0.441875	-1.16712	0	0
	0.4425	-1.16712	0	0
	0.443125	-1.16712	0	0
	0.44375	-1.16712	0	0
	0.444375	-1.16712	0	0
	0.445	-1.16712	0	0
	0.445625	-1.16712	0	0
	0.44625	-1.16712	0	0
	0.446875	-1.16712	0	0
	0.4475	-1.16712	0	0
	0.448125	-1.16712	0	0
	0.44875	-1.16712	0	0
	0.449375	-1.16712	0	0
	0.45	-1.16712	0	0
	0.450625	-1.16712	0	0
	0.45125	-1.16712	0	0
	0.451875	-1.16712	0	0
	0.4525	-1.16712	0	0
	0.453125	-1.16712	0	0
	0.45375	-1.16712	0	0
	0.454375	-1.16712	0	0
	0.455	-1.16712	0	0
	0.455625	-1.16712	0	0
	0.45625	-1.16712	0	0
	0.456875	-1.16712	0	0
	0.4575	-1.16712	0	0
	0.458125	-1.16712	0	0
	0.45875	-1.16712	0	0
	0.459375	-1.16712	0	0
	0.46	-1.16712	0	0
	0.460625	-1.16712	0	0
	0.46125	-1.16712	0	0
	0.461875	-1.16712	0	0
	0.4625	-1.16712	0	0
	0.463125	-1.16712	0	0
	0.46375	-1.16712	0	0
	0.464375	-1.16712	0	0
	0.465	-1.16712	0	0
	0.465625	-1.16712	0	0
	0.46625	-1.16712	0	0
	0.466875	-1.1664	0	0
	0.4675	-1.1664	0	0
	0.468125	-1.1664	0	0
	0.46875	-1.1664	0	0
	0.469375	-1.1664	0	0
	0.47	-1.1664	0	0
	0.470625	-1.1664	0	0
	0.47125	-1.1664	0	0
	0.471875	-1.1664	0	0
	0.4725	-1.1664	0	0
	0.473125	-1.1664	0	0
	0.47375	-1.1664	0	0
	0.474375	-1.1664	0	0
	0.475	-1.1664	0	0
	0.475625	-1.1664	0	0
	0.47625	-1.1664	0	0
	0.476875	-1.1664	0	0
	0.4775	-1.1664	0	0
	0.478125	-1.1664	0	0
	0.47875	-1.1664	0	0
	0.479375	-1.1664	0	0
	0.48	-1.1664	0	0
	0.480625	-1.1664	0	0
	0.48125	-1.1664	0	0
	0.481875	-1.1664	0	0
	0.4825	-1.1664	0	0
	0.483125	-1.1664	0	0
	0.48375	-1.1664	0	0
	0.484375	-1.1664	0	0
	0.485	-1.1664	0	0
	0.485625	-1.1664	0	0
	0.48625	-1.1664	0	0
	0.486875	-1.1664	0	0
	0.4875	-1.1664	0	0
	0.488125	-1.1664	0	0
	0.48875	-1.1664	0	0
	0.489375	-1.1664	0	0
	0.49	-1.1664	0	0
	0.490625	-1.1664	0	0
	0.49125	-1.1664	0	0
	0.491875	-1.1664	0	0
	0.4925	-1.1664	0	0
	0.493125	-1.1664	0	0
	0.49375	-1.1664	0	0
	0.494375	-1.1664	0	0
	0.495	-1.1664	0	0
	0.495625	-1.1664	0	0
	0.49625	-1.1664	0	0
	0.496875	-1.1664	0	0
	0.4975	-1.1664	0	0
	0.498125	-1.1664	0	0
	0.49875	-1.1664	0	0
	0.499375	-1.1664	0	0
	0.5	-1.1664	0	0
	0.500625	-1.1664	0	0
	0.50125	-1.1664	0	0
	0.501875	-1.1664	0	0
	0.5025	-1.1664	0	0
	0.503125	-1.1664	0	0
	0.50375	-1.1664	0	0
	0.504375	-1.1664	0	0
	0.505	-1.1664	0	0
	0.505625	-1.1664	0	0
	0.50625	-1.1664	0	0
	0.506875	-1.1664	0	0
	0.5075	-1.1664	0	0
	0.508125	-1.1664	0	0
	0.50875	-1.1664	0	0
	0.509375	-1.1664	0	0
	0.51	-1.1664	0	0
	0.510625	-1.1664	0	0
	0.51125	-1.1664	0	0
	0.511875	-1.1664	0	0
	0.5125	-1.1664	0	0
	0.513125	-1.1664	0	0
	0.51375	-1.1664	0	0
	0.514375	-1.1664	0	0
	0.515	-1.1664	0	0
	0.515625	-1.1664	0	0
	0.51625	-1.1664	0	0
	0.516875	-1.1664	0	0
	0.5175	-1.1664	0	0
	0.518125	-1.1664	0	0
	0.51875	-1.1664	0	0
	0.519375	-1.1664	0	0
	0.52	-1.1664	0	0
	0.520625	-1.1664	0	0
	0.52125	-1.1664	0	0
	0.521875	-1.1664	0	0
	0.5225	-1.1664	0	0
	0.523125	-1.1664	0	0
	0.52375	-1.1664	0	0
	0.524375	-1.1664	0	0
	0.525	-1.1664	0	0
	0.525625	-1.1664	0	0
	0.52625	-1.1664	0	0
	0.526875	-1.1664	0	0
	0.5275	-1.1664	0	0
	0.528125	-1.1664	0	0
	0.52875	-1.1664	0	0
	0.529375	-1.1664	0	0
	0.53	-1.1664	0	0
	0.530625	-1.1664	0	0
	0.53125	-1.1664	0	0
	0.531875	-1.1664	0	0
	0.5325	-1.1664	0	0
	0.533125	-1.1664	0	0
	0.53375	-1.1664	0	0
	0.534375	-1.1664	0	0
	0.535	-1.1664	0	0
	0.535625	-1.1664	0	0
	0.53625	-1.1664	0	0
	0.536875	-1.1664	0	0
	0.5375	-1.1664	0	0
	0.538125	-1.1664	0	0
	0.53875	-1.1664	0	0
	0.539375	-1.1664	0	0
	0.54	-1.1664	0	0
	0.540625	-1.1664	0	0
	0.54125	-1.1664	0	0
	0.541875	-1.1664	0	0
	0.5425	-1.16569	0	0
	0.543125	-1.16569	0	0
	0.54375	-1.16569	0	0
	0.544375	-1.16569	0	0
	0.545	-1.16569	0	0
	0.545625	-1.16569	0	0
	0.54625	-1.16569	0	0
	0.546875	-1.16569	0	0
	0.5475	-1.16569	0	0
	0.548125	-1.16569	0	0
	0.54875	-1.16569	0	0
	0.549375	-1.16569	0	0
	0.55	-1.16569	0	0
	0.550625	-1.16569	0	0
	0.55125	-1.16569	0	0
	0.551875	-1.16569	0	0
	0.5525	-1.16569	0	0
	0.553125	-1.16569	0	0
	0.55375	-1.16569	0	0
	0.554375	-1.16569	0	0
	0.555	-1.16569	0	0
	0.555625	-1.16569	0	0
	0.55625	-1.16569	0	0
	0.556875	-1.16569	0	0
	0.5575	-1.16569	0	0
	0.558125	-1.16569	0	0
	0.55875	-1.16569	0	0
	0.559375	-1.16569	0	0
	0.56	-1.16569	0	0
	0.560625	-1.16569	0	0
	0.56125	-1.16569	0	0
	0.561875	-1.16569	0	0
	0.5625	-1.16569	0	0
	0.563125	-1.16569	0	0
	0.56375	-1.16569	0	0
	0.564375	-1.16569	0	0
	0.565	-1.16569	0	0
	0.565625	-1.16569	0	0
	0.56625	-1.16569	0	0
	0.566875	-1.16569	0	0
	0.5675	-1.16569	0	0
	0.568125	-1.16569	0	0
	0.56875	-1.16569	0	0
	0.569375	-1.16569	0	0
	0.57	-1.16569	0	0
	0.570625	-1.16569	0	0
	0.57125	-1.16569	0	0
	0.571875	-1.16569	0	0
	0.5725	-1.16569	0	0
	0.573125	-1.16569	0	0
	0.57375	-1.16569	0	0
	0.574375	-1.16569	0	0
	0.575	-1.16569	0	0
	0.575625	-1.16569	0	0
	0.57625	-1.16569	0	0
	0.576875	-1.16569	0	0
	0.5775	-1.16569	0	0
	0.578125	-1.16569	0	0
	0.57875	-1.16569	0	0
	0.579375	-1.16569	0	0
	0.58	-1.16498	0	0
	0.580625	-1.16498	0	0
	0.58125	-1.16498	0	0
	0.581875	-1.16498	0	0
	0.5825	-1.16498	0	0
	0.583125	-1.16498	0	0
	0.58375	-1.16498	0	0
	0.584375	-1.16498	0	0
	0.585	-1.16498	0	0
	0.585625	-1.16498	0	0
	0.58625	-1.16498	0	0
	0.586875	-1.16498	0	0
	0.5875	-1.16498	0	0
	0.588125	-1.16498	0	0
	0.58875	-1.16498	0	0
	0.589375	-1.16498	0	0
	0.59	-1.16498	0	0
	0.590625	-1.16498	0	0
	0.59125	-1.16498	0	0
	0.591875	-1.16498	0	0
	0.5925	-1.16498	0	0
	0.593125	-1.16498	0	0
	0.59375	-1.16498	0	0
	0.594375	-1.16498	0	0
	0.595	-1.16498	0	0
	0.595625	-1.16498	0	0
	0.59625	-1.16498	0	0
	0.596875	-1.16498	0	0
	0.5975	-1.16498	0	0
	0.598125	-1.16498	0	0
	0.59875	-1.16498	0	0
	0.599375	-1.16498	0	0
	0.6	-1.16498	0	0
	0.600625	-1.16498	0	0
	0.60125	-1.16498	0	0
	0.601875	-1.16498	0	0
	0.6025	-1.16498	0	0
	0.603125	-1.16498	0	0
	0.60375	-1.16498	0	0
	0.604375	-1.16498	0	0
	0.605	-1.16498	0	0
	0.605625	-1.16498	0	0
	0.60625	-1.16498	0	0
	0.606875	-1.16498	0	0
	0.6075	-1.16498	0	0
	0.608125	-1.16498	0	0
	0.60875	-1.16498	0	0
	0.609375	-1.16498	0	0
	0.61	-1.16498	0	0
	0.610625	-1.16498	0	0
	0.61125	-1.16498	0	0
	0.611875	-1.16498	0	0
	0.6125	-1.16498	0	0
	0.613125	-1.16498	0	0
	0.61375	-1.16498	0	0
	0.614375	-1.16498	0	0
	0.615	-1.16498	0	0
	0.615625	-1.16498	0	0
	0.61625	-1.16498	0	0
	0.616875	-1.16498	0	0
	0.6175	-1.16498	0	0
	0.618125	-1.16427	0	0
	0.61875	-1.16427	0	0
	0.619375	-1.16427	0	0
	0.62	-1.16427	0	0
	0.620625	-1.16427	0	0
	0.62125	-1.16427	0	0
	0.621875	-1.16427	0	0
	0.6225	-1.16427	0	0
	0.623125	-1.16427	0	0
	0.62375	-1.16427	0	0
	0.624375	-1.16427	0	0
	0.625	-1.16427	0	0
	0.625625	-1.16427	0	0
	0.62625	-1.16427	0	0
	0.626875	-1.16427	0	0
	0.6275	-1.16427	0	0
	0.628125	-1.16427	0	0
	0.62875	-1.16427	0	0
	0.629375	-1.16427	0	0
	0.63	-1.16427	0	0
	0.630625	-1.16427	0	0
	0.63125	-1.16427	0	0
	0.631875	-1.16427	0	0
	0.6325	-1.16427	0	0
	0.633125	-1.16427	0	0
	0.63375	-1.16427	0	0
	0.634375	-1.16427	0	0
	0.635	-1.16427	0	0
	0.635625	-1.16427	0	0
	0.63625	-1.16427	0	0
	0.636875	-1.16427	0	0
	0.6375	-1.16427	0	0
	0.638125	-1.16427	0	0
	0.63875	-1.16427	0	0
	0.639375	-1.16427	0	0
	0.64	-1.16427	0	0
	0.640625	-1.16427	0	0
	0.64125	-1.16427	0	0
	0.641875	-1.16427	0	0
	0.6425	-1.16427	0	0
	0.643125	-1.16427	0	0
	0.64375	-1.16427	0	0
	0.644375	-1.16427	0	0
	0.645	-1.16427	0	0
	0.645625	-1.16427	0	0
	0.64625	-1.16427	0	0
	0.646875	-1.16427	0	0
	0.6475	-1.16427	0	0
	0.648125	-1.16427	0	0
	0.64875	-1.16427	0	0
	0.649375	-1.16427	0	0
	0.65	-1.16427	0	0
	0.650625	-1.16427	0	0
	0.65125	-1.16427	0	0
	0.651875	-1.16427	0	0
	0.6525	-1.16427	0	0
	0.653125	-1.16427	0	0
	0.65375	-1.16427	0	0
	0.654375	-1.16427	0	0
	0.655	-1.16427	0	0
	0.655625	-1.16355	0	0
	0.65625	-1.16355	0	0
	0.656875	-1.16355	0	0
	0.6575	-1.16355	0	0
	0.658125	-1.16355	0	0
	0.65875	-1.16355	0	0
	0.659375	-1.16355	0	0
	0.66	-1.16355	0	0
	0.660625	-1.16355	0	0
	0.66125	-1.16355	0	0
	0.661875	-1.16355	0	0
	0.6625	-1.16355	0	0
	0.663125	-1.16355	0	0
	0.66375	-1.16355	0	0
	0.664375	-1.16355	0	0
	0.665	-1.16355	0	0
	0.665625	-1.16355	0	0
	0.66625	-1.16355	0	0
	0.666875	-1.16355	0	0
	0.6675	-1.16355	0	0
	0.668125	-1.16355	0	0
	0.66875	-1.16355	0	0
	0.669375	-1.16355	0	0
	0.67	-1.16355	0	0
	0.670625	-1.16355	0	0
	0.67125	-1.16355	0	0
	0.671875	-1.16355	0	0
	0.6725	-1.16355	0	0
	0.673125	-1.16355	0	0
	0.67375	-1.16355	0	0
	0.674375	-1.16355	0	0
	0.675	-1.16355	0	0
	0.675625	-1.16355	0	0
	0.67625	-1.16355	0	0
	0.676875	-1.16355	0	0
	0.6775	-1.16355	0	0
	0.678125	-1.16355	0	0
	0.67875	-1.16355	0	0
	0.679375	-1.16355	0	0
	0.68	-1.16355	0	0
	0.680625	-1.16355	0	0
	0.68125	-1.16355	0	0
	0.681875	-1.16355	0	0
	0.6825	-1.16355	0	0
	0.683125	-1.16355	0	0
	0.68375	-1.16355	0	0
	0.684375	-1.16355	0	0
	0.685	-1.16355	0	0
	0.685625	-1.16355	0	0
	0.68625	-1.16355	0	0
	0.686875	-1.16355	0	0
	0.6875	-1.16355	0	0
	0.688125	-1.16355	0	0
	0.68875	-1.16355	0	0
	0.689375	-1.16355	0	0
	0.69	-1.16355	0	0
	0.690625	-1.16355	0	0
	0.69125	-1.16355	0	0
	0.691875	-1.16355	0	0
	0.6925	-1.16355	0	0
	0.693125	-1.16355	0	0
	0.69375	-1.16284	0	0
	0.694375	-1.16284	0	0
	0.695	-1.16284	0	0
	0.695625	-1.16284	0	0
	0.69625	-1.16284	0	0
	0.696875	-1.16284	0	0
	0.6975	-1.16284	0	0
	0.698125	-1.16284	0	0
	0.69875	-1.16284	0	0
	0.699375	-1.16284	0	0
	0.7	-1.16284	0	0
	0.700625	-1.16284	0	0
	0.70125	-1.16284	0	0
	0.701875	-1.16284	0	0
	0.7025	-1.16284	0	0
	0.703125	-1.16284	0	0
	0.70375	-1.16284	0	0
	0.704375	-1.16284	0	0
	0.705	-1.16284	0	0
	0.705625	-1.16284	0	0
	0.70625	-1.16284	0	0
	0.706875	-1.16284	0	0
	0.7075	-1.16284	0	0
	0.708125	-1.16284	0	0
	0.70875	-1.16284	0	0
	0.709375	-1.16284	0	0
	0.71	-1.16284	0	0
	0.710625	-1.16284	0	0
	0.71125	-1.16284	0	0
	0.711875	-1.16284	0	0
	0.7125	-1.16284	0	0
	0.713125	-1.16284	0	0
	0.71375	-1.16284	0	0
	0.714375	-1.16284	0	0
	0.715	-1.16284	0	0
	0.715625	-1.16284	0	0
	0.71625	-1.16284	0	0
	0.716875	-1.16284	0	0
	0.7175	-1.16284	0	0
	0.718125	-1.16284	0	0
	0.71875	-1.16284	0	0
	0.719375	-1.16284	0	0
	0.72	-1.16284	0	0
	0.720625	-1.16284	0	0
	0.72125	-1.16284	0	0
	0.721875	-1.16284	0	0
	0.7225	-1.16284	0	0
	0.723125	-1.16284	0	0
	0.72375	-1.16284	0	0
	0.724375	-1.16284	0	0
	0.725	-1.16284	0	0
	0.725625	-1.16284	0	0
	0.72625	-1.16284	0	0
	0.726875	-1.16284	0	0
	0.7275	-1.16284	0	0
	0.728125	-1.16284	0	0
	0.72875	-1.16284	0	0
	0.729375	-1.16284	0	0
	0.73	-1.16284	0	0
	0.730625	-1.16284	0	0
	0.73125	-1.16212	0	0
	0.731875	-1.16212	0	0
	0.7325	-1.16212	0	0
	0.733125	-1.16212	0	0
	0.73375	-1.16212	0	0
	0.734375	-1.16212	0	0
	0.735	-1.16212	0	0
	0.735625	-1.16212	0	0
	0.73625	-1.16212	0	0
	0.736875	-1.16212	0	0
	0.7375	-1.16212	0	0
	0.738125	-1.16212	0	0
	0.73875	-1.16212	0	0
	0.739375	-1.16212	0	0
	0.74	-1.16212	0	0
	0.740625	-1.16212	0	0
	0.74125	-1.16212	0	0
	0.741875	-1.16212	0	0
	0.7425	-1.16212	0	0
	0.743125	-1.16212	0	0
	0.74375	-1.16212	0	0
	0.744375	-1.16212	0	0
	0.745	-1.16212	0	0
	0.745625	-1.16212	0	0
	0.74625	-1.16212	0	0
	0.746875	-1.16212	0	0
	0.7475	-1.16212	0	0
	0.748125	-1.16212	0	0
	0.74875	-1.16212	0	0
	0.749375	-1.16212	0	0
	0.75	-1.16212	0	0
	0.750625	-1.16212	0	0
	0.75125	-1.16212	0	0
	0.751875	-1.16212	0	0
	0.7525	-1.16212	0	0
	0.753125	-1.16212	0	0
	0.75375	-1.16212	0	0
	0.754375	-1.16212	0	0
	0.755	-1.16212	0	0
	0.755625	-1.16212	0	0
	0.75625	-1.16212	0	0
	0.756875	-1.16212	0	0
	0.7575	-1.16212	0	0
	0.758125	-1.16212	0	0
	0.75875	-1.16212	0	0
	0.759375	-1.16212	0	0
	0.76	-1.16212	0	0
	0.760625	-1.16212	0	0
	0.76125	-1.16212	0	0
	0.761875	-1.16212	0	0
	0.7625	-1.16212	0	0
	0.763125	-1.16212	0	0
	0.76375	-1.16212	0	0
	0.764375	-1.16212	0	0
	0.765	-1.16212	0	0
	0.765625	-1.16212	0	0
	0.76625	-1.16212	0	0
	0.766875	-1.16212	0	0
	0.7675	-1.16212	0	0
	0.768125	-1.16212	0	0
	0.76875	-1.16212	0	0
	0.769375	-1.16141	0	0
	0.77	-1.16141	0	0
	0.770625	-1.16141	0	0
	0.77125	-1.16141	0	0
	0.771875	-1.16141	0	0
	0.7725	-1.16141	0	0
	0.773125	-1.16141	0	0
	0.77375	-1.16141	0	0
	0.774375	-1.16141	0	0
	0.775	-1.16141	0	0
	0.775625	-1.16141	0	0
	0.77625	-1.16141	0	0
	0.776875	-1.16141	0	0
	0.7775	-1.16141	0	0
	0.778125	-1.16141	0	0
	0.77875	-1.16141	0	0
	0.779375	-1.16141	0	0
	0.78	-1.16141	0	0
	0.780625	-1.16141	0	0
	0.78125	-1.16141	0	0
	0.781875	-1.16141	0	0
	0.7825	-1.16141	0	0
	0.783125	-1.16141	0	0
	0.78375	-1.16141	0	0
	0.784375	-1.16141	0	0
	0.785	-1.16141	0	0
	0.785625	-1.16141	0	0
	0.78625	-1.16141	0	0
	0.786875	-1.16141	0	0
	0.7875	-1.16141	0	0
	0.788125	-1.16141	0	0
	0.78875	-1.16141	0	0
	0.789375	-1.16141	0	0
	0.79	-1.16141	0	0
	0.790625	-1.16141	0	0
	0.79125	-1.16141	0	0
	0.791875	-1.16141	0	0
	0.7925	-1.16141	0	0
	0.793125	-1.16141	0	0
	0.79375	-1.16141	0	0
	0.794375	-1.16141	0	0
	0.795	-1.16141	0	0
	0.795625	-1.16141	0	0
	0.79625	-1.16141	0	0
	0.796875	-1.16141	0	0
	0.7975	-1.16141	0	0
	0.798125	-1.16141	0	0
	0.79875	-1.16141	0	0
	0.799375	-1.16141	0	0
	0.8	-1.16141	0	0
	0.800625	-1.16141	0	0
	0.80125	-1.16141	0	0
	0.801875	-1.16141	0	0
	0.8025	-1.16141	0	0
	0.803125	-1.16141	0	0
	0.80375	-1.16141	0	0
	0.804375	-1.16141	0	0
	0.805	-1.16141	0	0
	0.805625	-1.16141	0	0
	0.80625	-1.16141	0	0
	0.806875	-1.1607	0	0
	0.8075	-1.1607	0	0
	0.808125	-1.1607	0	0
	0.80875	-1.1607	0	0
	0.809375	-1.1607	0	0
	0.81	-1.1607	0	0
	0.810625	-1.1607	0	0
	0.81125	-1.1607	0	0
	0.811875	-1.1607	0	0
	0.8125	-1.1607	0	0
	0.813125	-1.1607	0	0
	0.81375	-1.1607	0	0
	0.814375	-1.1607	0	0
	0.815	-1.1607	0	0
	0.815625	-1.1607	0	0
	0.81625	-1.1607	0	0
	0.816875	-1.1607	0	0
	0.8175	-1.1607	0	0
	0.818125	-1.1607	0	0
	0.81875	-1.1607	0	0
	0.819375	-1.1607	0	0
	0.82	-1.1607	0	0
	0.820625	-1.1607	0	0
	0.82125	-1.1607	0	0
	0.821875	-1.1607	0	0
	0.8225	-1.1607	0	0
	0.823125	-1.1607	0	0
	0.82375	-1.1607	0	0
	0.824375	-1.1607	0	0
	0.825	-1.1607	0	0
	0.825625	-1.1607	0	0
	0.82625	-1.1607	0	0
	0.826875	-1.1607	0	0
	0.8275	-1.1607	0	0
	0.828125	-1.1607	0	0
	0.82875	-1.1607	0	0
	0.829375	-1.1607	0	0
	0.83	-1.1607	0	0
	0.830625	-1.1607	0	0
	0.83125	-1.1607	0	0
	0.831875	-1.1607	0	0
	0.8325	-1.1607	0	0
	0.833125	-1.1607	0	0
	0.83375	-1.1607	0	0
	0.834375	-1.1607	0	0
	0.835	-1.1607	0	0
	0.835625	-1.1607	0	0
	0.83625	-1.1607	0	0
	0.836875	-1.1607	0	0
	0.8375	-1.1607	0	0
	0.838125	-1.1607	0	0
	0.83875	-1.1607	0	0
	0.839375	-1.1607	0	0
	0.84	-1.1607	0	0
	0.840625	-1.1607	0	0
	0.84125	-1.1607	0	0
	0.841875	-1.1607	0	0
	0.8425	-1.1607	0	0
	0.843125	-1.1607	0	0
	0.84375	-1.1607	0	0
	0.844375	-1.1607	0	0
	0.845	-1.15999	0	0
	0.845625	-1.15999	0	0
	0.84625	-1.15999	0	0
	0.846875	-1.15999	0	0
	0.8475	-1.15999	0	0
	0.848125	-1.15999	0	0
	0.84875	-1.15999	0	0
	0.849375	-1.15999	0	0
	0.85	-1.15999	0	0
	0.850625	-1.15999	0	0
	0.85125	-1.15999	0	0
	0.851875	-1.15999	0	0
	0.8525	-1.15999	0	0
	0.853125	-1.15999	0	0
	0.85375	-1.15999	0	0
	0.854375	-1.15999	0	0
	0.855	-1.15999	0	0
	0.855625	-1.15999	0	0
	0.85625	-1.15999	0	0
	0.856875	-1.15999	0	0
	0.8575	-1.15999	0	0
	0.858125	-1.15999	0	0
	0.85875	-1.15999	0	0
	0.859375	-1.15999	0	0
	0.86	-1.15999	0	0
	0.860625	-1.15999	0	0
	0.86125	-1.15999	0	0
	0.861875	-1.15999	0	0
	0.8625	-1.15999	0	0
	0.863125	-1.15999	0	0
	0.86375	-1.15999	0	0
	0.864375	-1.15999	0	0
	0.865	-1.15999	0	0
	0.865625	-1.15999	0	0
	0.86625	-1.15999	0	0
	0.866875	-1.15999	0	0
	0.8675	-1.15999	0	0
	0.868125	-1.15999	0	0
	0.86875	-1.15999	0	0
	0.869375	-1.15999	0	0
	0.87	-1.15999	0	0
	0.870625	-1.15999	0	0
	0.87125	-1.15999	0	0
	0.871875	-1.15999	0	0
	0.8725	-1.15999	0	0
	0.873125	-1.15999	0	0
	0.87375	-1.15999	0	0
	0.874375	-1.15999	0	0
	0.875	-1.15999	0	0
	0.875625	-1.15999	0	0
	0.87625	-1.15999	0	0
	0.876875	-1.15999	0	0
	0.8775	-1.15999	0	0
	0.878125	-1.15999	0	0
	0.87875	-1.15999	0	0
	0.879375	-1.15999	0	0
	0.88	-1.15999	0	0
	0.880625	-1.15999	0	0
	0.88125	-1.15999	0	0
	0.881875	-1.15999	0	0
	0.8825	-1.15927	0	0
	0.883125	-1.15927	0	0
	0.88375	-1.15927	0	0
	0.884375	-1.15927	0	0
	0.885	-1.15927	0	0
	0.885625	-1.15927	0	0
	0.88625	-1.15927	0	0
	0.886875	-1.15927	0	0
	0.8875	-1.15927	0	0
	0.888125	-1.15927	0	0
	0.88875	-1.15927	0	0
	0.889375	-1.15927	0	0
	0.89	-1.15927	0	0
	0.890625	-1.15927	0	0
	0.89125	-1.15927	0	0
	0.891875	-1.15927	0	0
	0.8925	-1.15927	0	0
	0.893125	-1.15927	0	0
	0.89375	-1.15927	0	0
	0.894375	-1.15927	0	0
	0.895	-1.15927	0	0
	0.895625	-1.15927	0	0
	0.89625	-1.15927	0	0
	0.896875	-1.15927	0	0
	0.8975	-1.15927	0	0
	0.898125	-1.15927	0	0
	0.89875	-1.15927	0	0
	0.899375	-1.15927	0	0
	0.9	-1.15927	0	0
	0.900625	-1.15927	0	0
	0.90125	-1.15927	0	0
	0.901875	-1.15927	0	0
	0.9025	-1.15927	0	0
	0.903125	-1.15927	0	0
	0.90375	-1.15927	0	0
	0.904375	-1.15927	0	0
	0.905	-1.15927	0	0
	0.905625	-1.15927	0	0
	0.90625	-1.15927	0	0
	0.906875	-1.15927	0	0
	0.9075	-1.15927	0	0
	0.908125	-1.15927	0	0
	0.90875	-1.15927	0	0
	0.909375	-1.15927	0	0
	0.91	-1.15927	0	0
	0.910625	-1.15927	0	0
	0.91125	-1.15927	0	0
	0.911875	-1.15927	0	0
	0.9125	-1.15927	0	0
	0.913125	-1.15927	0	0
	0.91375	-1.15927	0	0
	0.914375	-1.15927	0	0
	0.915	-1.15927	0	0
	0.915625	-1.15927	0	0
	0.91625	-1.15927	0	0
	0.916875	-1.15927	0	0
	0.9175	-1.15927	0	0
	0.918125	-1.15927	0	0
	0.91875	-1.15927	0	0
	0.919375	-1.15927	0	0
	0.92	-1.15927	0	0
	0.920625	-1.15784	0	0
	0.92125	-1.15784	0	0
	0.921875	-1.15784	0	0
	0.9225	-1.15784	0	0
	0.923125	-1.15784	0	0
	0.92375	-1.15784	0	0
	0.924375	-1.15784	0	0
	0.925	-1.15784	0	0
	0.925625	-1.15784	0	0
	0.92625	-1.15784	0	0
	0.926875	-1.15784	0	0
	0.9275	-1.15784	0	0
	0.928125	-1.15784	0	0
	0.92875	-1.15784	0	0
	0.929375	-1.15784	0	0
	0.93	-1.15784	0	0
	0.930625	-1.15784	0	0
	0.93125	-1.15784	0	0
	0.931875	-1.15784	0	0
	0.9325	-1.15784	0	0
	0.933125	-1.15784	0	0
	0.93375	-1.15784	0	0
	0.934375	-1.15784	0	0
	0.935	-1.15784	0	0
	0.935625	-1.15784	0	0
	0.93625	-1.15784	0	0
	0.936875	-1.15784	0	0
	0.9375	-1.15784	0	0
	0.938125	-1.15784	0	0
	0.93875	-1.15784	0	0
	0.939375	-1.15784	0	0
	0.94	-1.15784	0	0
	0.940625	-1.15784	0	0
	0.94125	-1.15784	0	0
	0.941875	-1.15784	0	0
	0.9425	-1.15784	0	0
	0.943125	-1.15784	0	0
	0.94375	-1.15784	0	0
	0.944375	-1.15784	0	0
	0.945	-1.15784	0	0
	0.945625	-1.15784	0	0
	0.94625	-1.15784	0	0
	0.946875	-1.15784	0	0
	0.9475	-1.15784	0	0
	0.948125	-1.15784	0	0
	0.94875	-1.15784	0	0
	0.949375	-1.15784	0	0
	0.95	-1.15784	0	0
	0.950625	-1.15784	0	0
	0.95125	-1.15784	0	0
	0.951875	-1.15784	0	0
	0.9525	-1.15784	0	0
	0.953125	-1.15784	0	0
	0.95375	-1.15784	0	0
	0.954375	-1.15784	0	0
	0.955	-1.15784	0	0
	0.955625	-1.15784	0	0
	0.95625	-1.15784	0	0
	0.956875	-1.15784	0	0
	0.9575	-1.15784	0	0
	0.958125	-1.15713	0	0
	0.95875	-1.15713	0	0
	0.959375	-1.15713	0	0
	0.96	-1.15713	0	0
	0.960625	-1.15713	0	0
	0.96125	-1.15713	0	0
	0.961875	-1.15713	0	0
	0.9625	-1.15713	0	0
	0.963125	-1.15713	0	0
	0.96375	-1.15713	0	0
	0.964375	-1.15713	0	0
	0.965	-1.15713	0	0
	0.965625	-1.15713	0	0
	0.96625	-1.15713	0	0
	0.966875	-1.15713	0	0
	0.9675	-1.15713	0	0
	0.968125	-1.15713	0	0
	0.96875	-1.15713	0	0
	0.969375	-1.15713	0	0
	0.97	-1.15713	0	0
	0.970625	-1.15713	0	0
	0.97125	-1.15713	0	0
	0.971875	-1.15713	0	0
	0.9725	-1.15713	0	0
	0.973125	-1.15713	0	0
	0.97375	-1.15713	0	0
	0.974375	-1.15713	0	0
	0.975	-1.15713	0	0
	0.975625	-1.15713	0	0
	0.97625	-1.15713	0	0
	0.976875	-1.15713	0	0
	0.9775	-1.15713	0	0
	0.978125	-1.15713	0	0
	0.97875	-1.15713	0	0
	0.979375	-1.15713	0	0
	0.98	-1.15713	0	0
	0.980625	-1.15713	0	0
	0.98125	-1.15713	0	0
	0.981875	-1.15713	0	0
	0.9825	-1.15713	0	0
	0.983125	-1.15713	0	0
	0.98375	-1.15713	0	0
	0.984375	-1.15713	0	0
	0.985	-1.15713	0	0
	0.985625	-1.15713	0	0
	0.98625	-1.15713	0	0
	0.986875	-1.15713	0	0
	0.9875	-1.15713	0	0
	0.988125	-1.15713	0	0
	0.98875	-1.15713	0	0
	0.989375	-1.15713	0	0
	0.99	-1.15713	0	0
	0.990625	-1.15713	0	0
	0.99125	-1.15713	0	0
	0.991875	-1.15713	0	0
	0.9925	-1.15713	0	0
	0.993125	-1.15713	0	0
	0.99375	-1.15713	0	0
	0.994375	-1.15713	0	0
	0.995	-1.15713	0	0
	0.995625	-1.15713	0	0
	0.99625	-1.15642	0	0
	0.996875	-1.15642	0	0
	0.9975	-1.15642	0	0
	0.998125	-1.15642	0	0
	0.99875	-1.15642	0	0
	0.999375	-1.15642	0	0
	1	-1.15642	0	0
	1.00063	-1.15642	0	0
	1.00125	-1.15642	0	0
	1.00188	-1.15642	0	0
	1.0025	-1.15642	0	0
	1.00313	-1.15642	0	0
	1.00375	-1.15642	0	0
	1.00438	-1.15642	0	0
	1.005	-1.15642	0	0
	1.00562	-1.15642	0	0
	1.00625	-1.15642	0	0
	1.00687	-1.15642	0	0
	1.0075	-1.15642	0	0
	1.00812	-1.15642	0	0
	1.00875	-1.15642	0	0
	1.00937	-1.15642	0	0
	1.01	-1.15642	0	0
	1.01063	-1.15642	0	0
	1.01125	-1.15642	0	0
	1.01188	-1.15642	0	0
	1.0125	-1.15642	0	0
	1.01313	-1.15642	0	0
	1.01375	-1.15642	0	0
	1.01438	-1.15642	0	0
	1.015	-1.15642	0	0
	1.01562	-1.15642	0	0
	1.01625	-1.15642	0	0
	1.01687	-1.15642	0	0
	1.0175	-1.15642	0	0
	1.01812	-1.15642	0	0
	1.01875	-1.15642	0	0
	1.01937	-1.15642	0	0
	1.02	-1.15642	0	0
	1.02062	-1.15642	0	0
	1.02125	-1.15642	0	0
	1.02188	-1.15642	0	0
	1.0225	-1.15642	0	0
	1.02313	-1.15642	0	0
	1.02375	-1.15642	0	0
	1.02438	-1.15642	0	0
	1.025	-1.15642	0	0
	1.02563	-1.15642	0	0
	1.02625	-1.15642	0	0
	1.02687	-1.15642	0	0
	1.0275	-1.15642	0	0
	1.02812	-1.15642	0	0
	1.02875	-1.15642	0	0
	1.02937	-1.15642	0	0
	1.03	-1.15642	0	0
	1.03062	-1.15642	0	0
	1.03125	-1.15642	0	0
	1.03188	-1.15642	0	0
	1.0325	-1.15642	0	0
	1.03313	-1.15642	0	0
	1.03375	-1.15499	0	0
	1.03438	-1.15499	0	0
	1.035	-1.15499	0	0
	1.03563	-1.15499	0	0
	1.03625	-1.15499	0	0
	1.03687	-1.15499	0	0
	1.0375	-1.15499	0	0
	1.03812	-1.15499	0	0
	1.03875	-1.15499	0	0
	1.03937	-1.15499	0	0
	1.04	-1.15499	0	0
	1.04062	-1.15499	0	0
	1.04125	-1.15499	0	0
	1.04188	-1.15499	0	0
	1.0425	-1.15499	0	0
	1.04313	-1.15499	0	0
	1.04375	-1.15499	0	0
	1.04438	-1.15499	0	0
	1.045	-1.15499	0	0
	1.04563	-1.15499	0	0
	1.04625	-1.15499	0	0
	1.04688	-1.15499	0	0
	1.0475	-1.15499	0	0
	1.04812	-1.15499	0	0
	1.04875	-1.15499	0	0
	1.04937	-1.15499	0	0
	1.05	-1.15499	0	0
	1.05062	-1.15499	0	0
	1.05125	-1.15499	0	0
	1.05187	-1.15499	0	0
	1.0525	-1.15499	0	0
	1.05313	-1.15499	0	0
	1.05375	-1.15499	0	0
	1.05438	-1.15499	0	0
	1.055	-1.15499	0	0
	1.05563	-1.15499	0	0
	1.05625	-1.15499	0	0
	1.05688	-1.15499	0	0
	1.0575	-1.15499	0	0
	1.05812	-1.15499	0	0
	1.05875	-1.15499	0	0
	1.05937	-1.15499	0	0
	1.06	-1.15499	0	0
	1.06062	-1.15499	0	0
	1.06125	-1.15499	0	0
	1.06187	-1.15499	0	0
	1.0625	-1.15499	0	0
	1.06313	-1.15499	0	0
	1.06375	-1.15499	0	0
	1.06438	-1.15499	0	0
	1.065	-1.15499	0	0
	1.06563	-1.15499	0	0
	1.06625	-1.15499	0	0
	1.06688	-1.15499	0	0
	1.0675	-1.15499	0	0
	1.06812	-1.15499	0	0
	1.06875	-1.15499	0	0
	1.06937	-1.15499	0	0
	1.07	-1.15499	0	0
	1.07062	-1.15499	0	0
	1.07125	-1.15499	0	0
	1.07187	-1.15428	0	0
	1.0725	-1.15428	0	0
	1.07313	-1.15428	0	0
	1.07375	-1.15428	0	0
	1.07438	-1.15428	0	0
	1.075	-1.15428	0	0
	1.07563	-1.15428	0	0
	1.07625	-1.15428	0	0
	1.07688	-1.15428	0	0
	1.0775	-1.15428	0	0
	1.07812	-1.15428	0	0
	1.07875	-1.15428	0	0
	1.07937	-1.15428	0	0
	1.08	-1.15428	0	0
	1.08062	-1.15428	0	0
	1.08125	-1.15428	0	0
	1.08187	-1.15428	0	0
	1.0825	-1.15428	0	0
	1.08312	-1.15428	0	0
	1.08375	-1.15428	0	0
	1.08438	-1.15428	0	0
	1.085	-1.15428	0	0
	1.08563	-1.15428	0	0
	1.08625	-1.15428	0	0
	1.08688	-1.15428	0	0
	1.0875	-1.15428	0	0
	1.08813	-1.15428	0	0
	1.08875	-1.15428	0	0
	1.08937	-1.15428	0	0
	1.09	-1.15428	0	0
	1.09062	-1.15428	0	0
	1.09125	-1.15428	0	0
	1.09187	-1.15428	0	0
	1.0925	-1.15428	0	0
	1.09312	-1.15428	0	0
	1.09375	-1.15428	0	0
	1.09438	-1.15428	0	0
	1.095	-1.15428	0	0
	1.09563	-1.15428	0	0
	1.09625	-1.15428	0	0
	1.09688	-1.15428	0	0
	1.0975	-1.15428	0	0
	1.09813	-1.15428	0	0
	1.09875	-1.15428	0	0
	1.09937	-1.15428	0	0
	1.1	-1.15428	0	0
	1.10062	-1.15428	0	0
	1.10125	-1.15428	0	0
	1.10187	-1.15428	0	0
	1.1025	-1.15428	0	0
	1.10312	-1.15428	0	0
	1.10375	-1.15428	0	0
	1.10438	-1.15428	0	0
	1.105	-1.15428	0	0
	1.10563	-1.15428	0	0
	1.10625	-1.15428	0	0
	1.10688	-1.15428	0	0
	1.1075	-1.15428	0	0
	1.10813	-1.15428	0	0
	1.10875	-1.15428	0	0
	1.10938	-1.15428	0	0
	1.11	-1.15356	0	0
	1.11062	-1.15356	0	0
	1.11125	-1.15356	0	0
	1.11187	-1.15356	0	0
	1.1125	-1.15356	0	0
	1.11312	-1.15356	0	0
	1.11375	-1.15356	0	0
	1.11437	-1.15356	0	0
	1.115	-1.15356	0	0
	1.11563	-1.15356	0	0
	1.11625	-1.15356	0	0
	1.11688	-1.15356	0	0
	1.1175	-1.15356	0	0
	1.11813	-1.15356	0	0
	1.11875	-1.15356	0	0
	1.11938	-1.15356	0	0
	1.12	-1.15356	0	0
	1.12062	-1.15356	0	0
	1.12125	-1.15356	0	0
	1.12187	-1.15356	0	0
	1.1225	-1.15356	0	0
	1.12312	-1.15356	0	0
	1.12375	-1.15356	0	0
	1.12437	-1.15356	0	0
	1.125	-1.15356	0	0
	1.12563	-1.15356	0	0
	1.12625	-1.15356	0	0
	1.12688	-1.15356	0	0
	1.1275	-1.15356	0	0
	1.12813	-1.15356	0	0
	1.12875	-1.15356	0	0
	1.12938	-1.15356	0	0
	1.13	-1.15356	0	0
	1.13062	-1.15356	0	0
	1.13125	-1.15356	0	0
	1.13187	-1.15356	0	0
	1.1325	-1.15356	0	0
	1.13312	-1.15356	0	0
	1.13375	-1.15356	0	0
	1.13437	-1.15356	0	0
	1.135	-1.15356	0	0
	1.13563	-1.15356	0	0
	1.13625	-1.15356	0	0
	1.13688	-1.15356	0	0
	1.1375	-1.15356	0	0
	1.13813	-1.15356	0	0
	1.13875	-1.15356	0	0
	1.13938	-1.15356	0	0
	1.14	-1.15356	0	0
	1.14062	-1.15356	0	0
	1.14125	-1.15356	0	0
	1.14187	-1.15356	0	0
	1.1425	-1.15356	0	0
	1.14312	-1.15356	0	0
	1.14375	-1.15356	0	0
	1.14437	-1.15356	0	0
	1.145	-1.15356	0	0
	1.14562	-1.15356	0	0
	1.14625	-1.15356	0	0
	1.14688	-1.15356	0	0
	1.1475	-1.15214	0	0
	1.14813	-1.15214	0	0
	1.14875	-1.15214	0	0
	1.14938	-1.15214	0	0
	1.15	-1.15214	0	0
	1.15063	-1.15214	0	0
	1.15125	-1.15214	0	0
	1.15187	-1.15214	0	0
	1.1525	-1.15214	0	0
	1.15312	-1.15214	0	0
	1.15375	-1.15214	0	0
	1.15437	-1.15214	0	0
	1.155	-1.15214	0	0
	1.15562	-1.15214	0	0
	1.15625	-1.15214	0	0
	1.15688	-1.15214	0	0
	1.1575	-1.15214	0	0
	1.15813	-1.15214	0	0
	1.15875	-1.15214	0	0
	1.15938	-1.15214	0	0
	1.16	-1.15214	0	0
	1.16063	-1.15214	0	0
	1.16125	-1.15214	0	0
	1.16187	-1.15214	0	0
	1.1625	-1.15214	0	0
	1.16312	-1.15214	0	0
	1.16375	-1.15214	0	0
	1.16437	-1.15214	0	0
	1.165	-1.15214	0	0
	1.16562	-1.15214	0	0
	1.16625	-1.15214	0	0
	1.16688	-1.15214	0	0
	1.1675	-1.15214	0	0
	1.16813	-1.15214	0	0
	1.16875	-1.15214	0	0
	1.16938	-1.15214	0	0
	1.17	-1.15214	0	0
	1.17063	-1.15214	0	0
	1.17125	-1.15214	0	0
	1.17188	-1.15214	0	0
	1.1725	-1.15214	0	0
	1.17312	-1.15214	0	0
	1.17375	-1.15214	0	0
	1.17437	-1.15214	0	0
	1.175	-1.15214	0	0
	1.17562	-1.15214	0	0
	1.17625	-1.15214	0	0
	1.17687	-1.15214	0	0
	1.1775	-1.15214	0	0
	1.17813	-1.15214	0	0
	1.17875	-1.15214	0	0
	1.17938	-1.15214	0	0
	1.18	-1.15214	0	0
	1.18063	-1.15214	0	0
	1.18125	-1.15214	0	0
	1.18188	-1.15214	0	0
	1.1825	-1.15214	0	0
	1.18312	-1.15214	0	0
	1.18375	-1.15214	0	0
	1.18437	-1.15214	0	0
	1.185	-1.15214	0	0
	1.18562	-1.15142	0	0
	1.18625	-1.15142	0	0
	1.18687	-1.15142	0	0
	1.1875	-1.15142	0	0
	1.18813	-1.15142	0	0
	1.18875	-1.15142	0	0
	1.18938	-1.15142	0	0
	1.19	-1.15142	0	0
	1.19063	-1.15142	0	0
	1.19125	-1.15142	0	0
	1.19188	-1.15142	0	0
	1.1925	-1.15142	0	0
	1.19312	-1.15142	0	0
	1.19375	-1.15142	0	0
	1.19437	-1.15142	0	0
	1.195	-1.15142	0	0
	1.19562	-1.15142	0	0
	1.19625	-1.15142	0	0
	1.19687	-1.15142	0	0
	1.1975	-1.15142	0	0
	1.19813	-1.15142	0	0
	1.19875	-1.15142	0	0
	1.19938	-1.15142	0	0
	1.2	-1.15142	0	0
	1.20063	-1.15142	0	0
	1.20125	-1.15142	0	0
	1.20188	-1.15142	0	0
	1.2025	-1.15142	0	0
	1.20312	-1.15142	0	0
	1.20375	-1.15142	0	0
	1.20437	-1.15142	0	0
	1.205	-1.15142	0	0
	1.20562	-1.15142	0	0
	1.20625	-1.15142	0	0
	1.20687	-1.15142	0	0
	1.2075	-1.15142	0	0
	1.20812	-1.15142	0	0
	1.20875	-1.15142	0	0
	1.20938	-1.15142	0	0
	1.21	-1.15142	0	0
	1.21063	-1.15142	0	0
	1.21125	-1.15142	0	0
	1.21188	-1.15142	0	0
	1.2125	-1.15142	0	0
	1.21313	-1.15142	0	0
	1.21375	-1.15142	0	0
	1.21437	-1.15142	0	0
	1.215	-1.15142	0	0
	1.21562	-1.15142	0	0
	1.21625	-1.15142	0	0
	1.21687	-1.15142	0	0
	1.2175	-1.15142	0	0
	1.21812	-1.15142	0	0
	1.21875	-1.15142	0	0
	1.21938	-1.15142	0	0
	1.22	-1.15142	0	0
	1.22063	-1.15142	0	0
	1.22125	-1.15142	0	0
	1.22188	-1.15142	0	0
	1.2225	-1.15142	0	0
	1.22313	-1.15	0	0
	1.22375	-1.15	0	0
	1.22437	-1.15	0	0
	1.225	-1.15	0	0
	1.22562	-1.15	0	0
	1.22625	-1.15	0	0
	1.22687	-1.15	0	0
	1.2275	-1.15	0	0
	1.22812	-1.15	0	0
	1.22875	-1.15	0	0
	1.22938	-1.15	0	0
	1.23	-1.15	0	0
	1.23063	-1.15	0	0
	1.23125	-1.15	0	0
	1.23188	-1.15	0	0
	1.2325	-1.15	0	0
	1.23313	-1.15	0	0
	1.23375	-1.15	0	0
	1.23438	-1.15	0	0
	1.235	-1.15	0	0
	1.23562	-1.15	0	0
	1.23625	-1.15	0	0
	1.23687	-1.15	0	0
	1.2375	-1.15	0	0
	1.23812	-1.15	0	0
	1.23875	-1.15	0	0
	1.23937	-1.15	0	0
	1.24	-1.15	0	0
	1.24063	-1.15	0	0
	1.24125	-1.15	0	0
	1.24188	-1.15	0	0
	1.2425	-1.15	0	0
	1.24313	-1.15	0	0
	1.24375	-1.15	0	0
	1.24438	-1.15	0	0
	1.245	-1.15	0	0
	1.24562	-1.15	0	0
	1.24625	-1.15	0	0
	1.24687	-1.15	0	0
	1.2475	-1.15	0	0
	1.24812	-1.15	0	0
	1.24875	-1.15	0	0
[truncated: 190,002 more rows]

## Sheet: Supplementary Figure 16
Supplementary Figure 16	Micrometer relative position	Measured relative position	Linear fit
	10	68	70.269
	20	135	136.366
	30	201	202.462
	40	267	268.559
	50	335	334.655
	60	401	400.752
	70	466	466.848
	80	533	532.945
	90	600	599.041
	100	665	665.138
	110	735	731.234
	120	799	797.331
	130	864	863.428
	140	930	929.524
	150	997	995.621
	160	1062	1061.72
	170	1129	1127.81
	180	1195	1193.91
	190	1260	1260.01
	200	1327	1326.1
	210	1392	1392.2
	220	1460	1458.3
	230	1524	1524.39
	240	1590	1590.49
	250	1655	1656.59
	260	1722	1722.68
	270	1788	1788.78
	280	1854	1854.88
	290	1919	1920.97
